# Supplementary material for: Exosome-mediated transfer of mRNAs and microRNAs is a novel mechanism of genetic exchange between cells
Source: Springer Nature journal article supplement (doi:10.1038/ncb1596), 2007-05-07
Supplement: 41556_2007_BFncb1596_MOESM16_ESM.pdf [file 41556_2007_BFncb1596_MOESM16_ESM.pdf]

## Supplementary Information, Table S1.

### Proteomic results from LC-MS/MS analysis of MC/9 exosomes.

Proteins of MC/9 exosomes were collected in the stacking parts of an SDS-PAGE, cut out, trypsinated and analysed by a tandem mass spectrometry. The experiment was repeated three times. All proteins identified are shown in the table. The proteins were compared to previously identified exosome proteins released from other cells (Epithelial cells<sup>2</sup>, Urine<sup>25</sup>, Dendritic cells<sup>15, 26</sup>, Microglia-derived exosomes<sup>27</sup>, T-cells<sup>7</sup>, B-cells<sup>28</sup>, Melanoma-derived exosomes<sup>29</sup>. No\* means number of experiments the protein was identified in and bold indicates proteins identified in all three samples.

| Accession No  | Protein name                                   | Location         | Family                  | MW (kDa)  | No*      | Identified before |
|---------------|------------------------------------------------|------------------|-------------------------|-----------|----------|-------------------|
| Q9CQV8        | 14-3-3 beta/alpha                              | cytoplasm        | other                   | 28        | 1        | no                |
| P62259        | 14-3-3 epsilon                                 | cytoplasm        | other                   | 29        | 1        | yes               |
| P68510        | 14-3-3 eta                                     | cytoplasm        | transcription regulator | 28        | 2        | yes               |
| P61982        | 14-3-3 gamma                                   | cytoplasm        | other                   | 28        | 1        | yes               |
| O70456        | 14-3-3 sigma                                   | cytoplasm        | other                   | 28        | 2        | yes               |
| P68254        | 14-3-3 theta                                   | cytoplasm        | other                   | 28        | 1        | no                |
| P63101        | 14-3-3 zeta/delta                              | cytoplasm        | enzyme                  | 28        | 2        | no                |
| O88685        | 26S protease regulatory subunit 6A             | nucleus          | transcription regulator | 49        | 1        | yes               |
| Q8VDM4        | 26S proteasome non-ATPase regulatory subunit 2 | cytoplasm        | other                   | 100       | 1        | no                |
| P63325        | 40S ribosomal protein S10                      | cytoplasm        | other                   | 19        | 2        | no                |
| P62281        | 40S ribosomal protein S11                      | cytoplasm        | other                   | 18        | 1        | no                |
| P63323        | 40S ribosomal protein S12                      | cytoplasm        | other                   | 14        | 1        | no                |
| P62301        | 40S ribosomal protein S13                      | cytoplasm        | other                   | 17        | 2        | no                |
| P62264        | 40S ribosomal protein S14                      | cytoplasm        | other                   | 16        | 1        | no                |
| P62245        | 40S ribosomal protein S15a                     | cytoplasm        | other                   | 15        | 1        | no                |
| P14131        | 40S ribosomal protein S16                      | cytoplasm        | other                   | 16        | 1        | no                |
| P63276        | 40S ribosomal protein S17                      | cytoplasm        | other                   | 15        | 1        | no                |
| <b>P62270</b> | <b>40S ribosomal protein S18</b>               | <b>cytoplasm</b> | <b>other</b>            | <b>18</b> | <b>3</b> | <b>yes</b>        |
| Q9CZX8        | 40S ribosomal protein S19                      | cytoplasm        | other                   | 16        | 1        | no                |
| P25444        | 40S ribosomal protein S2                       | cytoplasm        | other                   | 31        | 1        | no                |
| P60867        | 40S ribosomal protein S20                      | cytoplasm        | other                   | 13        | 1        | no                |
| P62267        | 40S ribosomal protein S23                      | cytoplasm        | other                   | 16        | 1        | no                |
| P62849        | 40S ribosomal protein S24                      | cytoplasm        | other                   | 15        | 2        | no                |
| P62852        | 40S ribosomal protein S25                      | cytoplasm        | other                   | 14        | 1        | no                |
| P62855        | 40S ribosomal protein S26                      | cytoplasm        | other                   | 13        | 2        | no                |
| <b>P62908</b> | <b>40S ribosomal protein S3</b>                | <b>cytoplasm</b> | <b>other</b>            | <b>27</b> | <b>3</b> | <b>no</b>         |
| P97351        | 40S ribosomal protein S3a                      | cytoplasm        | other                   | 30        | 1        | no                |
| P62702        | 40S ribosomal protein S4, X isoform            | cytoplasm        | other                   | 29        | 1        | no                |
| P97461        | 40S ribosomal protein S5                       | cytoplasm        | other                   | 23        | 1        | no                |
| P62754        | 40S ribosomal protein S6                       | cytoplasm        | other                   | 29        | 1        | no                |
| P62082        | 40S ribosomal protein S7                       | cytoplasm        | other                   | 22        | 1        | no                |
| P62242        | 40S ribosomal protein S8                       | cytoplasm        | other                   | 24        | 2        | no                |
| 6ZWN5         | 40S ribosomal protein S9                       | cytoplasm        | other                   | 22        | 1        | no                |
| P14206        | 40S ribosomal protein SA                       | plasma membrane  | transmembrane receptor  | 33        | 1        | no                |
| P10852        | 4F2 cell-surface antigen heavy chain           | plasma membrane  | transporter             | 58        | 1        | no                |
| P14869        | 60S acidic ribosomal protein P0                | cytoplasm        | other                   | 34        | 1        | no                |
| P47955        | 60S acidic ribosomal protein P1                | cytoplasm        | other                   | 11        | 1        | no                |
| P35979        | 60S ribosomal protein L12                      | cytoplasm        | other                   | 18        | 1        | no                |

|               |                                                                              |                        |                                |           |          |            |
|---------------|------------------------------------------------------------------------------|------------------------|--------------------------------|-----------|----------|------------|
| P47963        | 60S ribosomal protein L13                                                    | cytoplasm              | other                          | 24        | 1        | no         |
| P19253        | 60S ribosomal protein L13a                                                   | cytoplasm              | other                          | 23        | 1        | no         |
| Q9CR57        | 60S ribosomal protein L14                                                    | cytoplasm              | other                          | 23        | 1        | no         |
| Q9CPR4        | 60S ribosomal protein L17                                                    | cytoplasm              | other                          | 21        | 1        | no         |
| P35980        | 60S ribosomal protein L18                                                    | cytoplasm              | other                          | 22        | 2        | yes        |
| P62717        | 60S ribosomal protein L18a                                                   | cytoplasm              | other                          | 21        | 1        | yes        |
| O09167        | 60S ribosomal protein L21                                                    | cytoplasm              | other                          | 18        | 1        | no         |
| P67984        | 60S ribosomal protein L22                                                    | nucleus                | other                          | 15        | 1        | no         |
| P62751        | 60S ribosomal protein L23a                                                   | cytoplasm              | other                          | 18        | 1        | no         |
| Q8BP67        | 60S ribosomal protein L24                                                    | cytoplasm              | other                          | 18        | 1        | no         |
| P61358        | 60S ribosomal protein L27                                                    | cytoplasm              | other                          | 16        | 1        | no         |
| P47915        | 60S ribosomal protein L29                                                    | cytoplasm              | enzyme                         | 17        | 1        | no         |
| P62889        | 60S ribosomal protein L30                                                    | cytoplasm              | other                          | 13        | 1        | no         |
| P47964        | 60S ribosomal protein L36                                                    | cytoplasm              | other                          | 12        | 1        | no         |
| Q9D8E6        | 60S ribosomal protein L4                                                     | cytoplasm              | enzyme                         | 47        | 2        | no         |
| P47911        | 60S ribosomal protein L6                                                     | cytoplasm              | other                          | 33        | 1        | yes        |
| P14148        | 60S ribosomal protein L7                                                     | cytoplasm              | transcription regulator        | 31        | 1        | no         |
| P12970        | 60S ribosomal protein L7a                                                    | cytoplasm              | other                          | 30        | 1        | no         |
| P62918        | 60S ribosomal protein L8                                                     | cytoplasm              | other                          | 28        | 1        | no         |
| P20029        | 78 kDa glucose-regulated protein precursor                                   | cytoplasm              | other                          | 72        | 1        | no         |
| P68033        | Actin, alpha cardiac                                                         | cytoplasm              | other                          | 42        | 2        | yes        |
| P61161        | Actin-like protein 2                                                         | plasma membrane        | other                          | 45        | 1        | no         |
| Q99JY9        | Actin-like protein 3                                                         | plasma membrane        | other                          | 47        | 1        | no         |
| Q9JM76        | Actin-related protein 2/3 complex subunit 3                                  | cytoplasm              | other                          | 20        | 1        | no         |
| Q9CPW4        | Actin-related protein 2/3 complex subunit 5                                  | cytoplasm              | other                          | 16        | 1        | no         |
| <b>P11031</b> | <b>Activated RNA polymerase II transcriptional coactivator p15 precursor</b> | <b>nucleus</b>         | <b>transcription regulator</b> | <b>14</b> | <b>3</b> | <b>no</b>  |
| Q9QXN3        | Activating signal cointegrator 1                                             | nucleus                | transcription regulator        | 66        | 1        | no         |
| P57110        | ADAMTS-8 precursor                                                           | extracellular space    | peptidase                      | 10        | 1        | no         |
| P84078        | <b>ADP-ribosylation factor 1</b>                                             | cytoplasm              | transporter                    | <b>21</b> | <b>3</b> | <b>no</b>  |
| O88398        | Advillin                                                                     | cytoplasm              | other                          | 92        | 1        | yes        |
| <b>P17182</b> | <b>Alpha enolase</b>                                                         | <b>cytoplasm</b>       | <b>transcription regulator</b> | <b>47</b> | <b>3</b> | <b>yes</b> |
| P57780        | Alpha-actinin 4                                                              | cytoplasm              | other                          | 105       | 1        | yes        |
| P68373        | Alpha-tubulin 6                                                              | cytoplasm              | other                          | 50        | 1        | yes        |
| P97449        | Aminopeptidase N                                                             | plasma membrane        | peptidase                      | 110       | 1        | yes        |
| Q8VHS6        | Ankyrin repeat and SOCS box protein 15                                       | nucleus                | transcription regulator        | 66        | 2        | no         |
| <b>P97384</b> | <b>Annexin 11</b>                                                            | <b>nucleus</b>         | <b>other</b>                   | <b>54</b> | <b>3</b> | <b>yes</b> |
| <b>O35639</b> | <b>Annexin 3</b>                                                             | <b>cytoplasm</b>       | <b>enzyme</b>                  | <b>36</b> | <b>3</b> | <b>yes</b> |
| <b>P48036</b> | <b>Annexin 5</b>                                                             | <b>plasma membrane</b> | <b>other</b>                   | <b>36</b> | <b>3</b> | <b>yes</b> |
| <b>P14824</b> | <b>Annexin 6</b>                                                             | <b>plasma membrane</b> | <b>other</b>                   | <b>76</b> | <b>3</b> | <b>yes</b> |
| Q07076        | Annexin 7                                                                    | plasma membrane        | ion channel                    | 50        | 2        | yes        |
| O35640        | Annexin 8                                                                    | unknown                | other                          | 37        | 2        | no         |

|               |                                                             |                        |                                   |            |          |            |
|---------------|-------------------------------------------------------------|------------------------|-----------------------------------|------------|----------|------------|
| P32261        | Antithrombin-III precursor                                  | extracellular space    | other                             | 52         | 1        | no         |
| P08226        | Apo-E                                                       | extracellular space    | transporter                       | 36         | 1        | no         |
| Q9Z1R3        | Apo-M                                                       | plasma membrane        | transporter                       | 21         | 1        | no         |
| <b>Q91V92</b> | <b>ATP-citrate synthase</b>                                 | <b>cytoplasm</b>       | <b>enzyme</b>                     | <b>120</b> | <b>3</b> | <b>yes</b> |
| O54962        | Barrier-to-autointegration factor                           | nucleus                | other                             | 10         | 1        | no         |
| <b>P60710</b> | <b>Beta-actin</b>                                           | <b>cytoplasm</b>       | <b>other</b>                      | <b>42</b>  | <b>3</b> | <b>yes</b> |
| O54833        | Casein kinase II subunit alpha                              | cytoplasm              | kinase                            | 41         | 1        | no         |
| Q60737        | Casein kinase II subunit alpha                              | cytoplasm              | kinase                            | 45         | 1        | no         |
| P67871        | Casein kinase II subunit beta                               | cytoplasm              | kinase                            | 25         | 1        | no         |
| O08738        | Caspase-6 precursor                                         | cytoplasm              | peptidase                         | 32         | 1        | no         |
| O89110        | Caspase-8 precursor                                         | nucleus                | peptidase                         | 55         | 1        | no         |
| Q8K0V4        | CCR4-associated factor 3                                    | nucleus                | other                             | 82         | 2        | no         |
| Q61470        | CD37                                                        | plasma membrane        | other                             | 32         | 1        | no         |
| <b>P15702</b> | <b>CD43</b>                                                 | <b>plasma membrane</b> | <b>transmembrane receptor</b>     | <b>40</b>  | <b>3</b> | <b>no</b>  |
| <b>P41731</b> | <b>CD63</b>                                                 | <b>plasma membrane</b> | <b>other</b>                      | <b>26</b>  | <b>3</b> | <b>yes</b> |
| <b>Q9Z0M6</b> | <b>CD97 antigen precursor</b>                               | <b>plasma membrane</b> | <b>G-protein coupled receptor</b> | <b>90</b>  | <b>3</b> | <b>no</b>  |
| Q9Z1Q5        | Chloride intracellular channel protein 1                    | nucleus                | ion channel                       | 27         | 2        | yes        |
| Q9CZU6        | Citrate synthase, mitochondrial precursor                   | cytoplasm              | enzyme                            | 52         | 1        | no         |
| Q9QXK3        | Coatomer gamma-2 subunit                                    | cytoplasm              | transporter                       | 98         | 1        | no         |
| P18760        | Cofilin-1                                                   | nucleus                | other                             | 18         | 1        | yes        |
| Q8K212        | Coiled-coil alpha-helical rod protein 1                     | unknown                | other                             | 87         | 1        | no         |
| Q02788        | Collagen alpha-2(VI) chain precursor                        | extracellular space    | other                             | 110        | 1        | no         |
| Q9JMB8        | Contactin-6 precursor                                       | unknown                | enzyme                            | 114        | 1        | no         |
| Q8BT60        | Copine-3                                                    | unknown                | kinase                            | 60         | 1        | yes        |
| Q9Z140        | Copine-6                                                    | unknown                | transporter                       | 62         | 1        | no         |
| O89053        | Coronin-1A                                                  | cytoplasm              | other                             | 51         | 1        | yes        |
| Q62167        | DEAD-box protein 3, X-chromosomal                           | nucleus                | enzyme                            | 73         | 1        | no         |
| Q62371        | Discoidin domain-containing receptor 2 precursor            | plasma membrane        | kinase                            | 96         | 1        | no         |
| Q9EQP2        | EH-domain containing protein 4                              | plasma membrane        | enzyme                            | 61         | 1        | yes        |
| <b>P10126</b> | <b>Elongation factor 1-alpha 1</b>                          | <b>cytoplasm</b>       | <b>translation regulator</b>      | <b>50</b>  | <b>3</b> | <b>yes</b> |
| P62631        | Elongation factor 1-alpha 2                                 | cytoplasm              | translation regulator             | 50         | 1        | yes        |
| P58252        | Elongation factor 2                                         | cytoplasm              | translation regulator             | 95         | 1        | yes        |
| P08113        | Endoplasmin precursor                                       | plasma membrane        | other                             | 92         | 1        | yes        |
| P23116        | Eukaryotic translation initiation factor 3 subunit 10       | cytoplasm              | translation regulator             | 162        | 1        | no         |
| Q9DCH4        | Eukaryotic translation initiation factor 3 subunit 5        | cytoplasm              | translation regulator             | 38         | 1        | yes        |
| <b>O70194</b> | <b>Eukaryotic translation initiation factor 3 subunit 7</b> | <b>cytoplasm</b>       | <b>translation regulator</b>      | <b>64</b>  | <b>3</b> | <b>no</b>  |

|               |                                                                          |                        |                               |           |          |            |
|---------------|--------------------------------------------------------------------------|------------------------|-------------------------------|-----------|----------|------------|
| Q9ERK4        | Exportin-2                                                               | nucleus                | transporter                   | 110       | 2        | no         |
| <b>P26040</b> | <b>Ezrin</b>                                                             | <b>plasma membrane</b> | <b>other</b>                  | <b>69</b> | <b>3</b> | <b>yes</b> |
| P47753        | F-actin capping protein alpha-1 subunit                                  | cytoplasm              | other                         | 33        | 1        | no         |
| P47754        | F-actin capping protein alpha-2 subunit                                  | cytoplasm              | other                         | 33        | 1        | no         |
| P47757        | F-actin capping protein beta subunit                                     | cytoplasm              | other                         | 31        | 1        | yes        |
| Q920E5        | Farnesyl pyrophosphate synthetase                                        | cytoplasm              | enzyme                        | 41        | 1        | no         |
| Q9JMJ2        | F-box/WD-repeat protein 4                                                | unknown                | other                         | 46        | 1        | no         |
| P09528        | Ferritin heavy chain                                                     | cytoplasm              | enzyme                        | 21        | 2        | no         |
| P29391        | Ferritin light chain 1                                                   | cytoplasm              | other                         | 21        | 1        | yes        |
| P49945        | Ferritin light chain 2                                                   | unknown                | other                         | 21        | 1        | yes        |
| Q08879        | Fibulin-1 precursor                                                      | extracellular space    | other                         | 78        | 1        | no         |
| P05064        | Fructose-bisphosphate aldolase A                                         | cytoplasm              | enzyme                        | 39        | 2        | yes        |
| P63260        | Gamma-actin                                                              | cytoplasm              | other                         | 42        | 1        | yes        |
| P17183        | Gamma-enolase                                                            | cytoplasm              | enzyme                        | 47        | 1        | no         |
| P13020        | Gelsolin precursor                                                       | extracellular space    | other                         | 86        | 2        | no         |
| Q8BX17        | Gem-associated protein 5                                                 | nucleus                | other                         | 167       | 1        | no         |
| P06745        | Glucose-6-phosphate isomerase                                            | extracellular space    | enzyme                        | 63        | 2        | yes        |
| Q60934        | Glutamate receptor, ionotropic kainate 1 precursor                       | plasma membrane        | ion channel                   | 95        | 1        | no         |
| P16858        | Glyceraldehyde-3-phosphate dehydrogenase                                 | cytoplasm              | enzyme                        | 36        | 2        | yes        |
| P62827        | GTP-binding nuclear protein Ran                                          | nucleus                | enzyme                        | 24        | 2        | yes        |
| P68040        | Guanine nucleotide-binding protein beta subunit 2-like 1                 | cytoplasm              | enzyme                        | 35        | 1        | yes        |
| <b>P08752</b> | <b>Guanine nucleotide-binding protein G(i), alpha-2 subunit</b>          | <b>plasma membrane</b> | <b>enzyme</b>                 | <b>40</b> | <b>3</b> | <b>yes</b> |
| P62874        | Guanine nucleotide-binding protein G(I)/G(S)/G(T) beta subunit 1         | plasma membrane        | enzyme                        | 37        | 1        | yes        |
| Q9DC51        | Guanine nucleotide-binding protein G(k), alpha subunit                   | plasma membrane        | enzyme                        | 40        | 1        | yes        |
| P01899        | H-2 class I histocompatibility antigen, D-B alpha chain precursor        | plasma membrane        | transmembrane receptor        | 41        | 1        | no         |
| P01900        | H-2 class I histocompatibility antigen, D-B alpha chain precursor        | plasma membrane        | transmembrane receptor        | 41        | 2        | no         |
| <b>P14426</b> | <b>H-2 class I histocompatibility antigen, D-K alpha chain precursor</b> | <b>plasma membrane</b> | <b>transmembrane receptor</b> | <b>41</b> | <b>3</b> | <b>no</b>  |
| P01901        | H-2 class I histocompatibility antigen, K-B alpha chain precursor        | plasma membrane        | transmembrane receptor        | 41        | 1        | no         |
| P04223        | <b>H-2 class I histocompatibility antigen, K-K alpha chain precursor</b> | plasma membrane        | transmembrane receptor        | <b>42</b> | <b>3</b> | <b>no</b>  |
| P14429        | H-2 class I histocompatibility antigen, Q7 alpha chain precursor         | plasma membrane        | transmembrane receptor        | 38        | 1        | no         |
| <b>P01942</b> | <b>Hemoglobin alpha chain</b>                                            | <b>cytoplasm</b>       | <b>transporter</b>            | <b>15</b> | <b>3</b> | <b>yes</b> |
| P02088        | Hemoglobin beta-1 chain                                                  | cytoplasm              | transporter                   | 16        | 2        | no         |
| <b>P02089</b> | <b>Hemoglobin beta-2 chain</b>                                           | <b>unknown</b>         | <b>transporter</b>            | <b>16</b> | <b>3</b> | <b>yes</b> |
| <b>O35737</b> | <b>Heterogeneous nuclear ribonucleoprotein H</b>                         | <b>nucleus</b>         | <b>other</b>                  | <b>49</b> | <b>3</b> | <b>no</b>  |
| P61979        | Heterogeneous nuclear ribonucleoprotein K                                | nucleus                | other                         | 51        | 1        | no         |
| P10922        | Histone H1'                                                              | nucleus                | other                         | 21        | 1        | yes        |
| P15864        | Histone H1.2                                                             | nucleus                | other                         | 21        | 2        | yes        |

|               |                                                              |                            |                        |            |          |            |
|---------------|--------------------------------------------------------------|----------------------------|------------------------|------------|----------|------------|
| P43277        | Histone H1.3                                                 | nucleus                    | other                  | 22         | 1        | yes        |
| P43274        | Histone H1.4                                                 | nucleus                    | other                  | 22         | 1        | yes        |
| P43276        | Histone H1.5                                                 | nucleus                    | other                  | 22         | 2        | yes        |
| P10812        | Histone H2A type 1                                           | nucleus                    | other                  | 14         | 1        | yes        |
| P20671        | Histone H2A type 1-D                                         | nucleus                    | other                  | 14         | 2        | yes        |
| P20670        | Histone H2A type 2-A                                         | nucleus                    | other                  | 14         | 1        | yes        |
| P22752        | <b>Histone H2A.1</b>                                         | nucleus                    | other                  | <b>14</b>  | <b>3</b> | <b>yes</b> |
| P27661        | Histone H2A.X                                                | nucleus                    | other                  | 15         | 2        | yes        |
| <b>P17317</b> | <b>Histone H2A.Z</b>                                         | nucleus                    | other                  | <b>13</b>  | <b>2</b> | <b>yes</b> |
| <b>P10853</b> | <b>Histone H2B F</b>                                         | nucleus                    | other                  | <b>14</b>  | <b>3</b> | <b>yes</b> |
| P10854        | Histone H2B type 1-M                                         | nucleus                    | other                  | 14         | 1        | yes        |
| <b>P68433</b> | <b>Histone H3.1</b>                                          | nucleus                    | other                  | <b>15</b>  | <b>3</b> | <b>yes</b> |
| P84228        | Histone H3.2                                                 | nucleus                    | other                  | 15         | 2        | yes        |
| P84244        | Histone H3.3                                                 | nucleus                    | other                  | 15         | 1        | no         |
| <b>P62806</b> | <b>Histone H4</b>                                            | nucleus                    | other                  | <b>11</b>  | <b>3</b> | <b>yes</b> |
| <b>P63017</b> | <b>Hsc70</b>                                                 | <b>cytoplasm</b>           | <b>enzyme</b>          | <b>71</b>  | <b>3</b> | <b>yes</b> |
| <b>P11499</b> | <b>Hsp 84</b>                                                | <b>cytoplasm</b>           | <b>other</b>           | <b>83</b>  | <b>3</b> | <b>yes</b> |
| P07901        | Hsp 86                                                       | cytoplasm                  | other                  | 85         | 2        | yes        |
| <b>Q9CQN1</b> | Hsp75                                                        | <b>cytoplasm</b>           | <b>enzyme</b>          | <b>80</b>  | <b>3</b> | <b>no</b>  |
| P13597        | ICAM-1                                                       | plasma membrane            | transmembrane receptor | 59         | 1        | yes        |
| P70168        | Importin beta-1 subunit                                      | nucleus                    | transporter            | 97         | 1        | no         |
| <b>Q61739</b> | <b>Integrin alpha-6 precursor</b>                            | <b>plasma membrane</b>     | <b>other</b>           | <b>122</b> | <b>3</b> | <b>no</b>  |
| P09055        | Integrin beta-1 precursor                                    | plasma membrane            | transmembrane receptor | 88         | 2        | yes        |
| Q61703        | Inter-alpha-trypsin inhibitor heavy chain H2 precursor       | extracellular space        | other                  | 106        | 2        | no         |
| Q61704        | Inter-alpha-trypsin inhibitor heavy chain H3 precursor       | unknown                    | other                  | 99         | 1        | no         |
| P02535        | Keratin, type I cytoskeletal 10                              | cytoplasm                  | other                  | 58         | 1        | yes        |
| Q61414        | Keratin, type I cytoskeletal 15                              | cytoplasm                  | other                  | 49         | 1        | no         |
| Q61FZ6        | Keratin, type II cytoskeletal 1b                             | unknown                    | other                  | 61         | 1        | no         |
| Q922U2        | Keratin, type II cytoskeletal 5                              | cytoplasm                  | other                  | 62         | 2        | no         |
| P50446        | Keratin, type II cytoskeletal 6A                             | cytoplasm                  | other                  | 59         | 2        | no         |
| Q9Z331        | Keratin, type II cytoskeletal 6B                             | cytoplasm                  | other                  | 60         | 1        | no         |
| Q9R0H5        | Keratin, type II cytoskeletal 6G                             | cytoplasm                  | other                  | 57         | 1        | no         |
| Q9Z127        | Large neutral amino acids transporter small subunit 1        | plasma membrane            | transporter            | 56         | 1        | no         |
| Q61233        | L-plastin                                                    | cytoplasm                  | other                  | 70         | 1        | yes        |
| P32067        | Lupus La protein homolog                                     | nucleus                    | enzyme                 | 48         | 1        | no         |
| P24452        | Macrophage capping protein                                   | nucleus                    | other                  | 39         | 1        | no         |
| <b>P15089</b> | <b>Mast cell carboxypeptidase A precursor</b>                | <b>extracellular space</b> | <b>peptidase</b>       | <b>49</b>  | <b>3</b> | <b>no</b>  |
| P21844        | Mast cell protease 5 precursor                               | extracellular space        | peptidase              | 28         | 1        | no         |
| Q9Z1S0        | Mitotic checkpoint serine/threonine-protein kinase BUB1 beta | nucleus                    | kinase                 | 118        | 1        | no         |
| <b>P26041</b> | <b>Moesin</b>                                                | <b>plasma membrane</b>     | <b>other</b>           | <b>68</b>  | <b>3</b> | <b>yes</b> |
| P28665        | Murinoglobulin-1 precursor                                   | extracellular space        | transporter            | 165        | 2        | no         |
| Q9CR53        | Neuromedin B-32 precursor                                    | extracellular space        | other                  | 14         | 1        | no         |
| Q8R1F1        | Niban-like protein                                           | unknown                    | other                  | 85         | 1        | no         |
| Q9DBB4        | NMDA receptor-regulated 1-like protein                       | unknown                    | enzyme                 | 101        | 1        | no         |

|               |                                                                  |                            |                         |            |          |            |
|---------------|------------------------------------------------------------------|----------------------------|-------------------------|------------|----------|------------|
| Q9D6Z1        | Nucleolar protein Nop56                                          | nucleus                    | other                   | 64         | 1        | no         |
| P09405        | Nucleolin                                                        | nucleus                    | other                   | 77         | 1        | no         |
| Q61937        | Nucleophosmin                                                    | nucleus                    | transcription regulator | 33         | 1        | yes        |
| P28656        | Nucleosome assembly protein 1-like 1                             | nucleus                    | other                   | 45         | 1        | no         |
| P17742        | Peptidyl-prolyl cis-trans isomerase A                            | cytoplasm                  | enzyme                  | 18         | 1        | yes        |
| Q9WTU0        | PHD finger protein 2                                             | unknown                    | other                   | 121        | 1        | no         |
| Q80TJ7        | PHD finger protein 8 [Fragment]                                  | unknown                    | other                   | 111        | 1        | no         |
| P09411        | Phosphoglycerate kinase 1                                        | cytoplasm                  | kinase                  | 44         | 2        | yes        |
| Q9JJ00        | Phospholipid scramblase 1                                        | plasma membrane            | enzyme                  | 36         | 2        | yes        |
| P62962        | Profilin-1                                                       | cytoplasm                  | other                   | 15         | 1        | yes        |
| Q9WU78        | Programmed cell death 6 interacting protein                      | cytoplasm                  | other                   | 96         | 1        | yes        |
| P61290        | Proteasome activator complex subunit 3                           | cytoplasm                  | peptidase               | 30         | 1        | no         |
| O70435        | Proteasome subunit alpha type 3                                  | cytoplasm                  | peptidase               | 28         | 1        | no         |
| Q9R1P0        | Proteasome subunit alpha type 4                                  | cytoplasm                  | peptidase               | 29         | 1        | no         |
| Q9Z2U1        | Proteasome subunit alpha type 5                                  | cytoplasm                  | peptidase               | 26         | 1        | no         |
| P27773        | Protein disulfide-isomerase A3 precursor                         | cytoplasm                  | peptidase               | 57         | 1        | no         |
| P09103        | Protein disulfide-isomerase precursor                            | cytoplasm                  | enzyme                  | 57         | 1        | no         |
| <b>P52480</b> | <b>Pyruvate kinase, isozyme M2</b>                               | <b>cytoplasm</b>           | <b>kinase</b>           | <b>58</b>  | <b>3</b> | <b>yes</b> |
| P53657        | Pyruvate kinase, isozymes R/L                                    | unknown                    | kinase                  | 62         | 1        | no         |
| Q9CQD1        | Rab-5A                                                           | cytoplasm                  | enzyme                  | 24         | 1        | yes        |
| P61021        | Rab-5B                                                           | cytoplasm                  | enzyme                  | 24         | 1        | yes        |
| P35278        | Rab-5C                                                           | cytoplasm                  | enzyme                  | 23         | 1        | yes        |
| P26043        | Radixin                                                          | cytoplasm                  | other                   | 69         | 1        | yes        |
| <b>P62835</b> | <b>Rap-1A</b>                                                    | <b>cytoplasm</b>           | <b>enzyme</b>           | <b>21</b>  | <b>3</b> | <b>no</b>  |
| Q99JI6        | Rap-1b precursor                                                 | cytoplasm                  | enzyme                  | 21         | 2        | yes        |
| <b>Q9JKF1</b> | <b>Ras GTPase-activating-like protein IQGAP1</b>                 | <b>cytoplasm</b>           | <b>other</b>            | <b>189</b> | <b>3</b> | <b>yes</b> |
| P63001        | Ras-related C3 botulinum toxin substrate 1                       | cytoplasm                  | enzyme                  | 21         | 1        | yes        |
| Q05144        | Ras-related C3 botulinum toxin substrate 2                       | cytoplasm                  | enzyme                  | 21         | 1        | no         |
| P35283        | Ras-related protein Rab-12 [Fragment]                            | cytoplasm                  | enzyme                  | 22         | 1        | no         |
| P11370        | Retrovirus-related Env polyprotein from Fv-4 locus               | unknown                    | other                   | 74         | 2        | no         |
| P10404        | Retrovirus-related Env polyprotein precursor [Fragment]          | unknown                    | other                   | 34         | 1        | no         |
| Q9QZ19        | Serine incorporator 3                                            | cytoplasm                  | other                   | 53         | 1        | no         |
| P62137        | Serine/threonine protein phosphatase PP1-alpha catalytic subunit | cytoplasm                  | phosphatase             | 38         | 1        | no         |
| Q76MZ3        | Serine/threonine protein phosphatase PP1-alpha catalytic subunit | cytoplasm                  | phosphatase             | 65         | 1        | no         |
| Q921I1        | Serotransferrin precursor                                        | extracellular space        | other                   | 77         | 1        | yes        |
| <b>P07724</b> | <b>Serum albumin precursor</b>                                   | <b>extracellular space</b> | <b>transporter</b>      | <b>69</b>  | <b>3</b> | <b>yes</b> |
| P62305        | Small nuclear ribonucleoprotein E                                | nucleus                    | other                   | 11         | 1        | no         |
| Q8VDN2        | Sodium/potassium-transporting ATPase alpha-1 chain precursor     | plasma membrane            | transporter             | 113        | 3        | yes        |
| Q6P069        | Sorcin                                                           | cytoplasm                  | transporter             | 22         | 2        | yes        |
| <b>Q62093</b> | <b>Splicing factor, arginine/serine-rich 2</b>                   | <b>nucleus</b>             | <b>other</b>            | <b>25</b>  | <b>3</b> | <b>no</b>  |

|               |                                                      |                        |                    |           |          |            |
|---------------|------------------------------------------------------|------------------------|--------------------|-----------|----------|------------|
| <b>P84104</b> | <b>Splicing factor, arginine/serine-rich 3</b>       | <b>nucleus</b>         | <b>other</b>       | <b>19</b> | <b>3</b> | <b>no</b>  |
| <b>Q60864</b> | <b>Stress-induced-phosphoprotein 1</b>               | <b>cytoplasm</b>       | <b>other</b>       | <b>63</b> | <b>3</b> | <b>no</b>  |
| O08992        | Syntenin-1                                           | plasma membrane        | enzyme             | 32        | 1        | yes        |
| P26039        | Talin 1                                              | plasma membrane        | other              | 270       | 1        | yes        |
| P11984        | T-complex protein 1, alpha subunit A                 | cytoplasm              | other              | 60        | 1        | no         |
| P80314        | T-complex protein 1, beta subunit                    | cytoplasm              | kinase             | 57        | 1        | yes        |
| <b>P80315</b> | <b>T-complex protein 1, delta subunit</b>            | <b>cytoplasm</b>       | <b>other</b>       | <b>58</b> | <b>3</b> | <b>yes</b> |
| P80313        | T-complex protein 1, eta subunit                     | cytoplasm              | other              | 60        | 1        | no         |
| <b>P80318</b> | <b>T-complex protein 1, gamma subunit</b>            | <b>cytoplasm</b>       | <b>other</b>       | <b>61</b> | <b>3</b> | <b>no</b>  |
| P42932        | T-complex protein 1, theta subunit                   | cytoplasm              | enzyme             | 59        | 2        | yes        |
| P80317        | T-complex protein 1, zeta subunit                    | cytoplasm              | other              | 58        | 2        | yes        |
| Q9ER58        | Testican-2 precursor                                 | extracellular space    | other              | 47        | 2        | no         |
| Q8QZY6        | Tetraspanin-14                                       | unknown                | other              | 31        | 1        | no         |
| Q9Z0U1        | Tight junction protein ZO-2                          | plasma membrane        | kinase             | 13        | 1        | no         |
| <b>Q62351</b> | <b>Transferrin receptor protein 1</b>                | <b>plasma membrane</b> | <b>transporter</b> | <b>86</b> | <b>3</b> | <b>yes</b> |
| Q9WVA4        | Transgelin-2                                         | cytoplasm              | other              | 23        | 1        | no         |
| <b>Q01853</b> | <b>Transitional endoplasmic reticulum ATPase</b>     | <b>cytoplasm</b>       | <b>enzyme</b>      | <b>89</b> | <b>3</b> | <b>no</b>  |
| P17751        | Triosephosphate isomerase                            | cytoplasm              | enzyme             | 27        | 1        | yes        |
| P58771        | Tropomyosin 1 alpha chain                            | cytoplasm              | other              | 33        | 1        | no         |
| P21107        | Tropomyosin alpha 3 chain                            | cytoplasm              | other              | 33        | 1        | yes        |
| P68369        | Tubulin alpha-1 chain                                | cytoplasm              | other              | 50        | 1        | yes        |
| P05213        | Tubulin alpha-2 chain                                | cytoplasm              | other              | 50        | 2        | no         |
| P68372        | Tubulin beta-? chain                                 | cytoplasm              | other              | 50        | 2        | yes        |
| Q9ERD7        | Tubulin beta-3 chain                                 | cytoplasm              | other              | 50        | 1        | no         |
| <b>Q9D6F9</b> | <b>Tubulin beta-4 chain</b>                          | <b>cytoplasm</b>       | <b>other</b>       | <b>50</b> | <b>3</b> | <b>no</b>  |
| <b>P99024</b> | <b>Tubulin beta-5 chain</b>                          | <b>cytoplasm</b>       | <b>other</b>       | <b>50</b> | <b>3</b> | <b>yes</b> |
| Q922F4        | Tubulin beta-6 chain                                 | unknown                | other              | 50        | 1        | no         |
| P25911        | Tyrosine-protein kinase Lyn                          | cytoplasm              | kinase             | 59        | 1        | no         |
| Q62376        | U1 small nuclear ribonucleoprotein 70 kDa [Fragment] | nucleus                | other              | 44        | 1        | no         |
| Q8R1S0        | Ubiquinone biosynthesis monoxygenase COQ6            | unknown                | enzyme             | 51        | 1        | no         |
| P62991        | Ubiquitin                                            | cytoplasm              | other              | 9         | 2        | no         |
| O88342        | WD-repeat protein 1                                  | unknown                | other              | 66        | 1        | yes        |
| P29788        | Vitronectin precursor                                | extracellular space    | other              | 55        | 1        | yes        |
| Q5BLK4        | Zinc finger CCHC domain-containing protein 6         | unknown                | other              | 169       | 1        | no         |
