# Supplementary material for: Exosome-mediated transfer of mRNAs and microRNAs is a novel mechanism of genetic exchange between cells
Source: Springer Nature journal article supplement (doi:10.1038/ncb1596), 2007-05-07
Supplement: 41556_2007_BFncb1596_MOESM17_ESM.pdf [file 41556_2007_BFncb1596_MOESM17_ESM.pdf]

**Supplementary Information, Table S2.****All genes present in exosomes.**

All transcripts (1272) identified by Affymetrix mouse DNA microarray in mast cell (MC/9) derived exosomes. The raw data were analysed by the Affymetrix program GCOS followed by the spotfire software.

| Entrez gene ID | Gene Symbol            | Description                                                                                             |
|----------------|------------------------|---------------------------------------------------------------------------------------------------------|
| AK004541       | Wars                   | tryptophanyl-tRNA synthetase                                                                            |
| BC025918       | Rpl23                  | ribosomal protein L23                                                                                   |
| AF320340       | Cdv3                   | carnitine deficiency-associated gene expressed in ventricle 3                                           |
| AA208652       | Rps27                  | ribosomal protein S27                                                                                   |
| BQ176989       | Eif5                   | eukaryotic translation initiation factor 5                                                              |
| BG071718       | Bat5                   | HLA-B associated transcript 5                                                                           |
| BM118442       | 2510002A14Rik          | RIKEN cDNA 2510002A14 gene                                                                              |
| AK003350       | Zc3h11a                | zinc finger CCCH type containing 11A                                                                    |
| NM_019768      | Morf4l2                | mortality factor 4 like 2                                                                               |
| NM_013798      | Actg1                  | actin, gamma, cytoplasmic 1                                                                             |
| NM_133354      | Sumo2 ///<br>LOC236622 | SMT3 suppressor of mif two 3 homolog 2 (yeast) /// similar to<br>SMT3 suppressor of mif two 3 homolog 2 |
| NM_133354      | Sumo2                  | SMT3 suppressor of mif two 3 homolog 2 (yeast)                                                          |
| BM228780       | Spin                   | spindlin                                                                                                |
| NM_009093      | Rps29                  | ribosomal protein S29                                                                                   |
| NM_008722      | Npm1                   | nucleophosmin 1                                                                                         |
| BC010581       | Stmn1                  | stathmin 1                                                                                              |
| NM_019643      | 3010003L21Rik          | RIKEN cDNA 3010003L21 gene                                                                              |
| NM_013765      | Rps26                  | ribosomal protein S26                                                                                   |
| BC012413       | Rplp2                  | ribosomal protein, large P2                                                                             |
| NM_134086      | Slc38a1                | solute carrier family 38, member 1                                                                      |
| NM_052835      | Rpl10 ///<br>LOC234703 | ribosomal protein 10 /// similar to ribosomal protein L10                                               |
| NM_080635      | Eif3s3                 | eukaryotic translation initiation factor 3, subunit 3 (gamma)                                           |
| NM_019868      | Hnrph2                 | heterogeneous nuclear ribonucleoprotein H2                                                              |
| BC025909       | Rpl7                   | ribosomal protein L7                                                                                    |
| NM_020035      | Pigo                   | phosphatidylinositol glycan, class O                                                                    |
| BC002008       | Fabp5                  | fatty acid binding protein 5, epidermal                                                                 |
| NM_009836      | Cct3                   | chaperonin subunit 3 (gamma)                                                                            |
| NM_009076      | Rpl12                  | ribosomal protein L12                                                                                   |
| NM_025860      | Ddx18                  | DEAD (Asp-Glu-Ala-Asp) box polypeptide 18                                                               |
| NM_009081      | Rpl28                  | ribosomal protein L28                                                                                   |
| NM_009091      | Rps15                  | ribosomal protein S15                                                                                   |
| NM_025364      | 1110005A23Rik          | RIKEN cDNA 1110005A23 gene                                                                              |
| NM_011289      | Rpl27                  | ribosomal protein L27                                                                                   |
| BC008518       | Nnt                    | nicotinamide nucleotide transhydrogenase                                                                |
| NM_009096      | Rps6                   | ribosomal protein S6                                                                                    |
| NM_009033      | Rbmxrt                 | RNA binding motif protein, X chromosome retrogene                                                       |
| NM_011432      | Snrp1c                 | U1 small nuclear ribonucleoprotein 1C                                                                   |
| NM_133682      | Taz                    | tafazzin                                                                                                |
| NM_009084      | Rpl37a                 | ribosomal protein L37a                                                                                  |
| NM_009078      | Rpl19                  | ribosomal protein L19                                                                                   |

|           |                                        |                                                                                                                                                                                           |
|-----------|----------------------------------------|-------------------------------------------------------------------------------------------------------------------------------------------------------------------------------------------|
| NM_025592 | Rpl35                                  | ribosomal protein L35                                                                                                                                                                     |
| NM_009094 | Rps4x                                  | ribosomal protein S4, X-linked                                                                                                                                                            |
| NM_018853 | Rplp1                                  | ribosomal protein, large, P1                                                                                                                                                              |
| NM_133668 | Slc25a3                                | solute carrier family 25 (mitochondrial carrier, phosphate carrier), member 3                                                                                                             |
| BB456860  | Fkbp4                                  | FK506 binding protein 4                                                                                                                                                                   |
| NM_013647 | Rps16                                  | ribosomal protein S16                                                                                                                                                                     |
| AY074806  | H2afz                                  | H2A histone family, member Z                                                                                                                                                              |
| AF180518  | Gabarapl1                              | gamma-aminobutyric acid (GABA(A)) receptor-associated protein-like 1                                                                                                                      |
| NM_011292 | Rpl9                                   | ribosomal protein L9                                                                                                                                                                      |
| NM_017367 | Ccni                                   | cyclin I                                                                                                                                                                                  |
| BB037317  | Vapa                                   | vesicle-associated membrane protein, associated protein A                                                                                                                                 |
| NM_019912 | Ube2d2                                 | ubiquitin-conjugating enzyme E2D 2                                                                                                                                                        |
| NM_016897 | Timm23                                 | translocase of inner mitochondrial membrane 23 homolog (yeast)                                                                                                                            |
| NM_007838 | Ddost                                  | dolichyl-di-phosphooligosaccharide-protein glycotransferase                                                                                                                               |
| NM_018730 | Rpl36                                  | ribosomal protein L36                                                                                                                                                                     |
| NM_018730 | Rpl36                                  | ribosomal protein L36                                                                                                                                                                     |
| NM_025274 | Dppa5                                  | developmental pluripotency associated 5                                                                                                                                                   |
| NM_019883 | Uba52                                  | ubiquitin A-52 residue ribosomal protein fusion product 1                                                                                                                                 |
| NM_026635 | 5730536A07Rik                          | RIKEN cDNA 5730536A07 gene                                                                                                                                                                |
| BF608828  | Tpt1p                                  | Tpt1 pseudogene                                                                                                                                                                           |
| NM_013608 | Naca                                   | nascent polypeptide-associated complex alpha polypeptide                                                                                                                                  |
| NM_025571 | MGI:1913699                            | mitochondria-associated protein involved in granulocyte-macrophage colony-stimulating factor signal transduction                                                                          |
| NM_007394 | Acvr1                                  | activin A receptor, type 1                                                                                                                                                                |
| NM_011561 | Tdg ///<br>LOC434200 ///<br>LOC545124  | thymine DNA glycosylase /// similar to Thymine DNA glycosylase /// similar to Thymine DNA glycosylase                                                                                     |
| NM_019865 | Rpl36a                                 | ribosomal protein L36a                                                                                                                                                                    |
| NM_029550 | Keg1                                   | kidney expressed gene 1                                                                                                                                                                   |
| BC018354  | Cbx3 ///<br>LOC382769 ///<br>LOC544944 | chromobox homolog 3 (Drosophila HP1 gamma) /// similar to chromobox homolog 3 /// similar to chromobox homolog 3                                                                          |
| NM_007438 | Aldoa                                  | aldolase 1, A isoform                                                                                                                                                                     |
| AW495711  | Trp53inp1                              | transformation related protein 53 inducible nuclear protein 1                                                                                                                             |
| NM_009945 | Cox7a2                                 | cytochrome c oxidase, subunit VIIa 2                                                                                                                                                      |
| NM_009945 | Cox7a2                                 | cytochrome c oxidase, subunit VIIa 2                                                                                                                                                      |
| NM_011482 | Nhp211                                 | NHP2 non-histone chromosome protein 2-like 1 (S. cerevisiae)                                                                                                                              |
| NM_011482 | LOC434401                              | similar to NHP2-like protein 1 (High mobility group-like nuclear protein 2 homolog 1) ([U4/U6.U5] tri-snRNP 15.5 kDa protein) (Sperm specific antigen 1) (Fertilization antigen 1) (FA-1) |
| NM_021511 | Rrs1                                   | RRS1 ribosome biogenesis regulator homolog (S. cerevisiae)                                                                                                                                |
| BC010191  | Ptpn1                                  | protein tyrosine phosphatase, non-receptor type 1                                                                                                                                         |
| NM_024171 | Sec61b                                 | Sec61 beta subunit                                                                                                                                                                        |
| AK007779  | 1300007B12Rik                          | RIKEN cDNA 1300007B12 gene                                                                                                                                                                |
| NM_025275 | X83328                                 | EST X83328                                                                                                                                                                                |
| NM_025349 | Lsm7                                   | LSM7 homolog, U6 small nuclear RNA associated (S. cerevisiae)                                                                                                                             |
| NM_021338 | Rpl35a ///<br>4632409L19Rik            | ribosomal protein L35a /// RIKEN cDNA 4632409L19 gene                                                                                                                                     |

|           |                                |                                                                     |
|-----------|--------------------------------|---------------------------------------------------------------------|
| AW491660  | Tuba4                          | tubulin, alpha 4                                                    |
| NM_018770 | ---                            | ---                                                                 |
| BG069413  | Klf4                           | Kruppel-like factor 4 (gut)                                         |
| NM_130450 | Elovl6                         | ELOVL family member 6, elongation of long chain fatty acids (yeast) |
| NM_008907 | Ppia                           | peptidylprolyl isomerase A                                          |
| NM_025415 | Cks2                           | CDC28 protein kinase regulatory subunit 2                           |
| NM_025415 | Cks2                           | CDC28 protein kinase regulatory subunit 2                           |
| NM_025605 | 2400001E08Rik<br>/// LOC433216 | RIKEN cDNA 2400001E08 gene /// similar to RIKEN cDNA 2400001E08     |
| BB737182  | Rps6ka2                        | ribosomal protein S6 kinase, polypeptide 2                          |
| BB478992  | Sfxn1                          | sideroflexin 1                                                      |
| AK014593  | Rpl11                          | ribosomal protein L11                                               |
| BC008270  | Cpsf5                          | cleavage and polyadenylation specific factor 5                      |
| AA985754  | Eif2s2                         | eukaryotic translation initiation factor 2, subunit 2 (beta)        |
| NM_023546 | Ssty2                          |                                                                     |
| NM_027940 | 1700001F09Rik                  | RIKEN cDNA 1700001F09 gene                                          |
| BC003708  | Ptges3                         | prostaglandin E synthase 3 (cytosolic)                              |
| NM_009384 | Tiam1                          | T-cell lymphoma invasion and metastasis 1                           |
| NM_018851 | Samhd1                         | SAM domain and HD domain, 1                                         |
| NM_010151 | Nr2f1                          | nuclear receptor subfamily 2, group F, member 1                     |
| BG916549  | Sp1                            | trans-acting transcription factor 1                                 |
| NM_021560 | Bhlhb5                         | basic helix-loop-helix domain containing, class B5                  |
| NM_009083 | Rpl30                          | ribosomal protein L30                                               |
| NM_010710 | Lhx2                           | LIM homeobox protein 2                                              |
| NM_008636 | Mtf1                           | metal response element binding transcription factor 1               |
| NM_010240 | Ftl1                           | ferritin light chain 1                                              |
| NM_020261 | Psg23                          | pregnancy-specific glycoprotein 23                                  |
| NM_021512 | Nup160                         | nucleoporin 160                                                     |
| M29881    | LOC386462                      | similar to MHC Q8/9d surface antigen                                |
| NM_008084 |                                | similar to glyceraldehyde-3-phosphate dehydrogenase                 |
| NM_008305 | ---                            | ---                                                                 |
| NM_007652 | Cd59a                          | CD59a antigen                                                       |
| BI248938  | Arf6                           | ADP-ribosylation factor 6                                           |
| NM_011774 | Slc30a4                        | solute carrier family 30 (zinc transporter), member 4               |
| NM_007799 | Ctse                           | cathepsin E                                                         |
| NM_023119 | Eno1                           | enolase 1, alpha non-neuron                                         |
| BM234652  | Ero1l                          | ERO1-like ( <i>S. cerevisiae</i> )                                  |
| AK017673  | 2810417H13Rik                  | RIKEN cDNA 2810417H13 gene                                          |
| NM_032541 | Hamp1                          | hepcidin antimicrobial peptide 1                                    |
| NM_007865 | Dll1                           | delta-like 1 ( <i>Drosophila</i> )                                  |
| NM_008176 | Cxcl1                          | chemokine (C-X-C motif) ligand 1                                    |
| BB524597  | Klf7                           | Kruppel-like factor 7 (ubiquitous)                                  |
| AI528781  | Ss18                           | synovial sarcoma translocation, Chromosome 18                       |
| NM_011300 | Rps7                           | ribosomal protein S7                                                |
| NM_009173 | Siah1a /// Siah1b              | seven in absentia 1A /// seven in absentia 1B                       |
| NM_011651 | Stk22s1                        | serine/threonine kinase 22 substrate 1                              |
| NM_007475 | Arbp                           | acidic ribosomal phosphoprotein P0                                  |
| NM_010282 | Ggps1                          | geranylgeranyl diphosphate synthase 1                               |

|           |                      |                                                                                                        |
|-----------|----------------------|--------------------------------------------------------------------------------------------------------|
| NM_009414 | Tph1                 | tryptophan hydroxylase 1                                                                               |
| NM_007566 | Birc6                | baculoviral IAP repeat-containing 6                                                                    |
| AW492543  | AI428795             | expressed sequence AI428795                                                                            |
| NM_007393 | Actb                 | actin, beta, cytoplasmic                                                                               |
| NM_010699 | Ldh1                 | lactate dehydrogenase 1, A chain                                                                       |
| C79214    | D2Ert239e            | DNA segment, Chr 2, ERATO Doi 239, expressed                                                           |
| C77489    | D4Ert117e            | DNA segment, Chr 4, ERATO Doi 117, expressed                                                           |
| C86506    | ---                  | ---                                                                                                    |
| BE628832  | ---                  | ---                                                                                                    |
| AI462015  | ---                  | ---                                                                                                    |
| AI036317  | Lor                  | Loricrin                                                                                               |
| C77692    | D2Ert63e             | DNA segment, Chr 2, ERATO Doi 63, expressed                                                            |
| NM_013612 | Slc11a1              | solute carrier family 11 (proton-coupled divalent metal ion transporters), member 1                    |
| BC003705  | Sftpd                | surfactant associated protein D                                                                        |
| NM_030676 | Nr5a2                | nuclear receptor subfamily 5, group A, member 2                                                        |
| NM_007548 | Prdm1                | PR domain containing 1, with ZNF domain                                                                |
| NM_031188 | Mup1 /// Mup2        | major urinary protein 1 /// major urinary protein 2                                                    |
| BE134116  | Ptp4a2               | protein tyrosine phosphatase 4a2                                                                       |
| NM_025975 | Tcte11               | t-complex-associated-testis-expressed 1-like                                                           |
| NM_020008 | Clec7a               | C-type lectin domain family 7, member a                                                                |
| NM_029667 | 2310069N01Rik        | RIKEN cDNA 2310069N01 gene                                                                             |
| NM_016970 | Klrg1                | killer cell lectin-like receptor subfamily G, member 1                                                 |
| NM_011739 | Ywhaq                | tyrosine 3-monooxygenase/tryptophan 5-monooxygenase activation protein, theta polypeptide              |
| BB780848  | Plekha3              | pleckstrin homology domain-containing, family A (phosphoinositide binding specific) member 3           |
| NM_018753 | Ywhab                | tyrosine 3-monooxygenase/tryptophan 5-monooxygenase activation protein, beta polypeptide               |
| NM_130881 | Pabpc4 /// LOC432881 | poly A binding protein, cytoplasmic 4 /// similar to Poly(A) binding protein, cytoplasmic 4, isoform 1 |
| NM_020506 | Lats2 /// Xpo4       | large tumor suppressor 2 /// exportin 4                                                                |
| NM_018826 | Irx5                 | Iroquois related homeobox 5 (Drosophila)                                                               |
| NM_019985 | Clec1b               | C-type lectin domain family 1, member b                                                                |
| NM_028605 | 2410116I05Rik        | RIKEN cDNA 2410116I05 gene                                                                             |
| BB132229  | Olf78                | olfactory receptor 78                                                                                  |
| NM_133243 | AY036118             | cDNA sequence AY036118                                                                                 |
| NM_009647 | Ak3l1                | adenylate kinase 3 alpha-like 1                                                                        |
| M97216    | Aplp2                | amyloid beta (A4) precursor-like protein 2                                                             |
| BE911144  | Prkr                 | protein kinase, interferon-inducible double stranded RNA dependent                                     |
| BE911144  | Prkr                 | protein kinase, interferon-inducible double stranded RNA dependent                                     |
| NM_022985 | Za20d3               | zinc finger, A20 domain containing 3                                                                   |
| X63440    | Ptpn12               | protein tyrosine phosphatase, non-receptor type 12                                                     |
| AY028963  | Zbtb20               | zinc finger and BTB domain containing 20                                                               |
| NM_033616 | Sp100-rs             | similar to component of Sp100-rs                                                                       |
| NM_033616 | Csprs                | component of Sp100-rs                                                                                  |
| NM_008503 |                      | ribosomal protein S2 /// similar to 40S ribosomal protein S2                                           |
| AF263536  | Fgf23                | fibroblast growth factor 23                                                                            |

|           |                                |                                                                                                                                      |
|-----------|--------------------------------|--------------------------------------------------------------------------------------------------------------------------------------|
| NM_008500 | Lhx6                           | LIM homeobox protein 6                                                                                                               |
| NM_008836 | Phxr5                          | per-hexamer repeat gene 5                                                                                                            |
| NM_016959 | Rps3a                          | ribosomal protein S3a                                                                                                                |
| NM_007808 | Cyts                           | cytochrome c, somatic                                                                                                                |
| AK004804  | Smad4                          | MAD homolog 4 (Drosophila)                                                                                                           |
| NM_008251 | Hmgn1                          | high mobility group nucleosomal binding domain 1                                                                                     |
| NM_024187 | U2af1                          | U2 small nuclear ribonucleoprotein auxiliary factor (U2AF) 1                                                                         |
| NM_019722 | Arl2                           | ADP-ribosylation factor-like 2                                                                                                       |
| BI665246  | Yy1                            | YY1 transcription factor                                                                                                             |
| BE291523  | Mxd4                           | Max dimerization protein 4                                                                                                           |
| AB056479  | Cs                             | citrate synthase                                                                                                                     |
| NM_021306 | Ecel1                          | endothelin converting enzyme-like 1                                                                                                  |
| NM_013721 | Rpl7a                          | ribosomal protein L7a                                                                                                                |
| NM_018860 | Rpl41                          | RIKEN cDNA 2210411K19 gene                                                                                                           |
| NM_029376 | Speer4a                        | spermatogenesis associated glutamate (E)-rich protein 4a                                                                             |
| NM_008239 | Foxq1                          | forkhead box Q1                                                                                                                      |
| AV028400  | Pabpn1                         | poly(A) binding protein, nuclear 1                                                                                                   |
| NM_009821 | Runx1                          | runt related transcription factor 1                                                                                                  |
| NM_009821 | Runx1                          | runt related transcription factor 1                                                                                                  |
| NM_008587 | Mertk                          | c-mer proto-oncogene tyrosine kinase                                                                                                 |
| NM_009126 | Serpinb3b                      | serine (or cysteine) proteinase inhibitor, clade B (ovalbumin), member 3B                                                            |
| AV107150  | Rpl39                          | ribosomal protein L39                                                                                                                |
| AW549928  | 6720475J19Rik                  | RIKEN cDNA 6720475J19 gene                                                                                                           |
| AW549928  | 6720475J19Rik                  | RIKEN cDNA 6720475J19 gene                                                                                                           |
| AK002902  | Tomm20 ///<br>LOC546321        | translocase of outer mitochondrial membrane 20 homolog (yeast) /// similar to translocase of outer mitochondrial membrane 20 homolog |
| AK002902  | Tomm20                         | translocase of outer mitochondrial membrane 20 homolog (yeast)                                                                       |
| BE308547  | 5730427N09Rik<br>/// LOC433230 | RIKEN cDNA 5730427N09 gene /// similar to TGF beta-inducible nuclear protein 1 (L-name related LNR42)                                |
| AV347477  | Skp1a                          | S-phase kinase-associated protein 1A                                                                                                 |
| BQ174163  | 0610041E09Rik                  | RIKEN cDNA 0610041E09 gene                                                                                                           |
| AK004120  | Nola3                          | nucleolar protein family A, member 3                                                                                                 |
| BI111967  | H3f3a                          | H3 histone, family 3A                                                                                                                |
| BI111967  | H3f3a                          | H3 histone, family 3A                                                                                                                |
| AI530149  | Ccdc16                         | coiled-coil domain containing 16                                                                                                     |
| BF181445  | Tex261                         | testis expressed gene 261                                                                                                            |
| BF787570  | Ptma                           | prothymosin alpha                                                                                                                    |
| BI663320  | Hnrpa1                         | heterogeneous nuclear ribonucleoprotein A1                                                                                           |
| AK004662  | Fgfr1op2                       | FGFR1 oncogene partner 2                                                                                                             |
| BB303874  | Atp8a1                         | ATPase, aminophospholipid transporter (APLT), class I, type 8A, member 1                                                             |
| BM114165  | Rpl5                           | ribosomal protein L5                                                                                                                 |
| BE553944  | Rbm10                          | RNA binding motif protein 10                                                                                                         |
| BC010987  | Rps28                          | Ribosomal protein S28                                                                                                                |
| BE995700  | Egln1                          | EGL nine homolog 1 (C. elegans)                                                                                                      |
| BI693609  | Sui1-rs1                       | suppressor of initiator codon mutations, related sequence 1 (S. cerevisiae)                                                          |
| BC008117  | Tuba2                          | tubulin, alpha 2                                                                                                                     |

|          |               |                                                                                                                 |
|----------|---------------|-----------------------------------------------------------------------------------------------------------------|
| BC003896 |               | ribosomal protein L17 /// similar to Rpl17 protein                                                              |
| BC023062 | Ppp2r5a       | protein phosphatase 2, regulatory subunit B (B56), alpha isoform                                                |
| BC002316 | Gng5          | guanine nucleotide binding protein (G protein), gamma 5 subunit                                                 |
| BC016898 | D3Jfr1        | DNA segment, Chr 3, MJeffers 1                                                                                  |
| U93864   | Rps11         | ribosomal protein S11                                                                                           |
| BC006718 | B230219D22Rik | RIKEN cDNA B230219D22 gene                                                                                      |
| BC017619 | Morf4l1       | mortality factor 4 like 1                                                                                       |
| AW537349 | Seh1l         | SEH1-like ( <i>S. cerevisiae</i> )                                                                              |
| BI661719 | Smarca5       | SWI/SNF related, matrix associated, actin dependent regulator of chromatin, subfamily a, member 5               |
| AY082485 | Dppa3         | developmental pluripotency-associated 3                                                                         |
| BC020531 | Spon1         | spondin 1, (f-spondin) extracellular matrix protein                                                             |
| BI157430 | Camkk2        | calcium/calmodulin-dependent protein kinase kinase 2, beta                                                      |
| AV226922 | Mobk1b        | MOB1, Mps One Binder kinase activator-like 1B (yeast)                                                           |
| BB440272 | B230354K17Rik | RIKEN cDNA B230354K17 gene                                                                                      |
| AB055854 |               | RIKEN cDNA 1700017G21 gene                                                                                      |
| BC006737 | Casp8         | caspase 8                                                                                                       |
| BC021452 | Ddx6          | DEAD (Asp-Glu-Ala-Asp) box polypeptide 6                                                                        |
| BM225255 |               | cDNA sequence BC003993 /// similar to hypothetical protein MGC37588                                             |
| BM225255 |               |                                                                                                                 |
| BM225255 |               | cDNA sequence BC003993                                                                                          |
| BC024418 | Sf3b4         | splicing factor 3b, subunit 4                                                                                   |
| BC018223 | Eef1a1        | eukaryotic translation elongation factor 1 alpha 1                                                              |
| BC007152 | Eef2          | eukaryotic translation elongation factor 2                                                                      |
| BB137173 | 2700078E11Rik | RIKEN cDNA 2700078E11 gene                                                                                      |
| U00431   | Hmgbl         | high mobility group box 1 /// similar to High mobility group protein 1 (HMG-1) (High mobility group protein B1) |
| BC020068 | ---           | PREDICTED: <i>Mus musculus</i> LOC433960 (LOC433960), mRNA                                                      |
| AF306667 | Tbx20         | T-box 20                                                                                                        |
| AF237702 | Shmt1         | serine hydroxymethyl transferase 1 (soluble)                                                                    |
| BC021775 | 2010003O18Rik | RIKEN cDNA 2010003O18 gene                                                                                      |
| AV370830 | Gpr43         | G protein-coupled receptor 43                                                                                   |
| BB168536 | Zfp318        | zinc finger protein 318                                                                                         |
| BC003330 | Hrbl          | HIV-1 Rev binding protein-like                                                                                  |
| AJ244015 | Stau2         | staufen (RNA binding protein) homolog 2 ( <i>Drosophila</i> )                                                   |
| BC006049 | 0610011I04Rik | RIKEN cDNA 0610011I04 gene                                                                                      |
| AF307746 | Tnk1          | tyrosine kinase, non-receptor, 1                                                                                |
| BC016247 | 6430548M08Rik | RIKEN cDNA 6430548M08 gene                                                                                      |
| AF290196 | Zfp352        | zinc finger protein 352                                                                                         |
| AF113598 | Psg28         | pregnancy-specific glycoprotein 28                                                                              |
| BC025093 | Bxdc1         | brix domain containing 1                                                                                        |
| BC005705 | ---           | CDNA clone MGC:11898 IMAGE:3598523, complete cds                                                                |
| U57821   | Mdf1          | MyoD family inhibitor                                                                                           |
| BC019413 | Gstm7         | glutathione S-transferase, mu 7                                                                                 |
| U15647   | LOC277923     | reverse transcriptase                                                                                           |
| M55512   | Wt1           | Wilms tumor homolog                                                                                             |
| BC007159 | Cul4a         | Cullin 4A                                                                                                       |
| BC007159 | Cul4a         | Cullin 4A                                                                                                       |

|          |                            |                                                                                                                 |
|----------|----------------------------|-----------------------------------------------------------------------------------------------------------------|
| AF292033 | Twsg1                      | twisted gastrulation homolog 1 (Drosophila)                                                                     |
| BC006770 | LOC434536                  | LOC434536                                                                                                       |
| L36663   | Hnrpab                     | heterogeneous nuclear ribonucleoprotein A/B                                                                     |
| BC003485 | Brms1                      | breast cancer metastasis-suppressor 1                                                                           |
| M85235   | Rpl7                       | ribosomal protein L7                                                                                            |
| D44443   | LOC212970 ///<br>BC005685  | similar to BC005685 protein /// cDNA sequence BC005685                                                          |
| AI391218 | Glul                       | glutamate-ammonia ligase (glutamine synthase)                                                                   |
| D87867   |                            | UDP glucuronosyltransferase 1 family, polypeptide A2                                                            |
| BB085906 |                            | RIKEN cDNA 4933439C20 gene /// phosphatidylserine decarboxylase                                                 |
| BE944919 | Arf1                       | ADP-ribosylation factor 1                                                                                       |
| BM116592 | Neurod1                    | neurogenic differentiation 1                                                                                    |
| BM225534 | Btg4                       | B-cell translocation gene 4                                                                                     |
| AU017520 | Ovgp1                      | oviductal glycoprotein 1                                                                                        |
| BQ176723 | Nrp2                       | neuropilin 2                                                                                                    |
| BB283527 | 3100002L24Rik              | RIKEN cDNA 3100002L24 gene                                                                                      |
| BG068672 | ---                        | Transcribed locus                                                                                               |
| BF178310 | Rpl23a                     | ribosomal protein L23a                                                                                          |
| BF178310 | Rpl23a                     | ribosomal protein L23a                                                                                          |
| BG807647 | Rpl27a                     | ribosomal protein L27a                                                                                          |
| AJ006215 | Cmas                       | cytidine monophospho-N-acetylneuraminic acid synthetase                                                         |
| BG076079 | Hipk3                      | Homeodomain interacting protein kinase 3                                                                        |
| BM229104 | Set                        | SET translocation                                                                                               |
| BM229104 | Set                        | SET translocation                                                                                               |
| BB296692 | Rfwd2                      | ring finger and WD repeat domain 2                                                                              |
| BC002257 |                            | similar to BC005512 protein                                                                                     |
| AW701147 | Hnrpr                      | heterogeneous nuclear ribonucleoprotein R                                                                       |
| BF022827 | Ifnz                       | interferon zeta                                                                                                 |
| AV003927 | LOC434079 ///<br>LOC544891 | hypothetical LOC434079 /// hypothetical protein LOC544891                                                       |
| BB238462 | D3Bwg0562e                 | DNA segment, Chr 3, Brigham & Women's Genetics 0562 expressed                                                   |
| X53753   | Tpm3                       | tropomyosin 3, gamma                                                                                            |
| AF312018 | Krt2-19                    | keratin complex 2, basic, gene 19                                                                               |
| BB316578 | LOC434002                  | hypothetical gene supported by AK018238; AK046289                                                               |
| X96606   |                            | ovary testis transcribed /// similar to Ott protein                                                             |
| BB071996 | Nalp6                      | NACHT, leucine rich repeat and PYD containing 6                                                                 |
| BC012655 | Thrap3                     | thyroid hormone receptor associated protein 3                                                                   |
| BI251153 | Helz                       | helicase with zinc finger domain                                                                                |
| AA413531 |                            | eukaryotic translation initiation factor 1A /// similar to Eukaryotic translation initiation factor 1A (eIF-1A) |
| BC019591 | ---                        | ---                                                                                                             |
| AI509029 | Six3                       | sine oculis-related homeobox 3 homolog (Drosophila)                                                             |
| AI615965 | Zfp125                     | zinc finger protein 125                                                                                         |
| AJ010605 | Sox6                       | SRY-box containing gene 6                                                                                       |
| X06746   | Egr2                       | early growth response 2                                                                                         |
| M18237   | ---                        | Immunoglobulin rearranged kappa-chain (OK1) mRNA V region                                                       |
| BG794429 | 1100001I22Rik              | RIKEN cDNA 1100001I22 gene                                                                                      |
| BI076834 |                            | RIKEN cDNA 1200003I10 gene /// RIKEN cDNA 1200016E24                                                            |

|          |                                                 | gene                                                                                                                                                         |
|----------|-------------------------------------------------|--------------------------------------------------------------------------------------------------------------------------------------------------------------|
| AF373288 | Adam34                                          | a disintegrin and metalloprotease domain 34                                                                                                                  |
| BG968046 | Ndufb4                                          | NADH dehydrogenase (ubiquinone) 1 beta subcomplex 4                                                                                                          |
| AK004547 | Cdc51                                           | cell division cycle 5-like ( <i>S. pombe</i> )                                                                                                               |
| BI694986 | Chchd2                                          | coiled-coil-helix-coiled-coil-helix domain containing 2                                                                                                      |
| AW554408 | Usp9x                                           | ubiquitin specific protease 9, X chromosome                                                                                                                  |
| BM239931 | Rpl31                                           | ribosomal protein L31                                                                                                                                        |
| AK011930 | Hnrpa3 ///<br>LOC547321                         | heterogeneous nuclear ribonucleoprotein A3 /// similar to Hnrpa3 protein                                                                                     |
| AW545056 | 2900097C17Rik                                   | RIKEN cDNA 2900097C17 gene                                                                                                                                   |
| BM195235 |                                                 | similar to hypothetical protein LOC67055 /// hypothetical protein LOC544988                                                                                  |
| BG067396 | Pcnp                                            | PEST-containing nuclear protein                                                                                                                              |
| AK019542 | Wdr56                                           | WD repeat domain 56                                                                                                                                          |
| AV206764 | Rps24                                           | ribosomal protein S24                                                                                                                                        |
| AK011545 | Basp1                                           | brain abundant, membrane attached signal protein 1                                                                                                           |
| AK011360 | 2610009E16Rik                                   | RIKEN cDNA 2610009E16 gene                                                                                                                                   |
| BE692399 | 2610005L07Rik                                   | RIKEN cDNA 2610005L07 gene                                                                                                                                   |
| AK008457 | Rpl21                                           | ribosomal protein L21                                                                                                                                        |
| AW494389 | 2610524H06Rik                                   | RIKEN cDNA 2610524H06 gene                                                                                                                                   |
| AK018361 | Zfp393                                          | zinc finger protein 393                                                                                                                                      |
| BB826276 | 2510001I10Rik                                   | RIKEN cDNA 2510001I10 gene                                                                                                                                   |
| AK009462 | Akr1a4                                          | aldo-keto reductase family 1, member A4 (aldehyde reductase)                                                                                                 |
| AK007904 | Ccnd2                                           | cyclin D2                                                                                                                                                    |
| BM207059 | Rps15a                                          | ribosomal protein S15a                                                                                                                                       |
| BM729504 | Rps25                                           | ribosomal protein S25                                                                                                                                        |
| BI654600 | Pitpnc1                                         | phosphatidylinositol transfer protein, cytoplasmic 1                                                                                                         |
| AK002613 | Rpl10a                                          | ribosomal protein L10A                                                                                                                                       |
| BG297038 | 1300007C21Rik<br>/// LOC433762<br>/// LOC546083 | RIKEN cDNA 1300007C21 gene /// similar to Retrovirus-related POL polyprotein (Endonuclease) /// similar to Retrovirus-related Pol polyprotein (Endonuclease) |
| AK011748 |                                                 | RIKEN cDNA 1700001E04 gene                                                                                                                                   |
| AK009340 | 2310014H01Rik                                   | RIKEN cDNA 2310014H01 gene                                                                                                                                   |
| AK008394 | Ppih                                            | peptidyl prolyl isomerase H                                                                                                                                  |
| AK010713 | Klf3                                            | Kruppel-like factor 3 (basic)                                                                                                                                |
| AK004568 |                                                 | ribosomal protein S2 /// similar to 40S ribosomal protein S2                                                                                                 |
| AK004568 | Rps2                                            | ribosomal protein S2                                                                                                                                         |
| AK019911 | Wwox                                            | WW domain-containing oxidoreductase                                                                                                                          |
| AK016268 | 4930571B16Rik                                   | RIKEN cDNA 4930571B16 gene                                                                                                                                   |
| AK014104 | Wasl                                            | Wiskott-Aldrich syndrome-like (human)                                                                                                                        |
| AK003189 | Gcsh                                            | glycine cleavage system protein H (aminomethyl carrier)                                                                                                      |
| AK011359 | Ikbkb                                           | inhibitor of kappaB kinase beta                                                                                                                              |
| AK005498 | Npm1                                            | nucleophosmin 1                                                                                                                                              |
| AI413680 | Rps12                                           | ribosomal protein S12                                                                                                                                        |
| AA050777 | Rpl38                                           | ribosomal protein L38                                                                                                                                        |
| BE553881 | Hmgn2                                           | high mobility group nucleosomal binding domain 2                                                                                                             |
| AV216370 | Rpl36                                           | ribosomal protein L36                                                                                                                                        |
| AV123618 | Rps21                                           | ribosomal protein S21                                                                                                                                        |
| BM232571 | Prkwnk1                                         | protein kinase, lysine deficient 1                                                                                                                           |



|          |                                       |                                                                                                                 |
|----------|---------------------------------------|-----------------------------------------------------------------------------------------------------------------|
| BE993872 | Rpl14                                 | ribosomal protein L14                                                                                           |
| AV123577 | Rps21                                 | ribosomal protein S21                                                                                           |
| AI596986 | Serf2                                 | small EDRK-rich factor 2                                                                                        |
| AV014698 | 1110055N21Rik                         | RIKEN cDNA 1110055N21 gene                                                                                      |
| AI325112 | Tle1                                  | transducin-like enhancer of split 1, homolog of Drosophila E(spl)                                               |
| BG064927 | Aebp2                                 | AE binding protein 2                                                                                            |
| BB252350 | H3f3a                                 | H3 histone, family 3A                                                                                           |
| BB364520 | Tcf4                                  | transcription factor 4                                                                                          |
| AV124680 | Rpl35                                 | ribosomal protein L35                                                                                           |
| BG976607 | Mtm1                                  | X-linked myotubular myopathy gene 1                                                                             |
| BG976607 | ---                                   | ---                                                                                                             |
| BG976607 | ---                                   | ---                                                                                                             |
| AA200355 | Psma5                                 | proteasome (prosome, macropain) subunit, alpha type 5                                                           |
| AV124427 | Rps21                                 | ribosomal protein S21                                                                                           |
| AV217767 | Nutf2                                 | nuclear transport factor 2                                                                                      |
| BE134127 | Rps6                                  | ribosomal protein S6                                                                                            |
| BM241271 | ---                                   | Diabetic nephropathy-like protein (Dnr12) mRNA, partial sequence                                                |
| BM235696 | Usp34                                 | ubiquitin specific protease 34                                                                                  |
| AV334508 | Mef2d                                 | myocyte enhancer factor 2D                                                                                      |
| AW208635 | Eif3s6                                | eukaryotic translation initiation factor 3, subunit 6                                                           |
| BI714963 | Ran                                   | RAN, member RAS oncogene family                                                                                 |
| BM200204 | Larp5                                 | La ribonucleoprotein domain family, member 5                                                                    |
| AA762498 | Rps9                                  | ribosomal protein S9                                                                                            |
| BI692575 | 1110001P04Rik                         | RIKEN cDNA 1110001P04 gene                                                                                      |
| BB529352 | ---                                   | ---                                                                                                             |
| BQ175880 | Ccnd2                                 | cyclin D2                                                                                                       |
| BE992059 | Gpi1                                  | glucose phosphate isomerase 1                                                                                   |
| AV277440 | Nfate2ip                              | nuclear factor of activated T-cells, cytoplasmic, calcineurin-dependent 2 interacting protein                   |
| BB000887 | Rps10                                 | ribosomal protein S10                                                                                           |
| AV170241 | ---                                   | Mus musculus, Similar to RIKEN cDNA 3110005M08 gene, clone IMAGE:4207720, mRNA                                  |
| BB484975 | Gm1103 ///<br>LOC544682               | gene model 1103, (NCBI) /// ZBTB2-like                                                                          |
| AW546647 | Phr1                                  | pam, highwire, rpm 1                                                                                            |
| AA673371 | 4933439C20Rik                         | RIKEN cDNA 4933439C20 gene                                                                                      |
| BB532141 | Atxn7l3                               | ataxin 7-like 3                                                                                                 |
| BG063557 | Rg9mtd2                               | RNA (guanine-9-) methyltransferase domain containing 2                                                          |
| BB119177 | A130040M12Rik<br>///<br>E430024C06Rik | RIKEN cDNA A130040M12 gene /// RIKEN cDNA E430024C06 gene                                                       |
| BF019960 | Anapc5                                | anaphase-promoting complex subunit 5                                                                            |
| BF019960 | Anapc5                                | anaphase-promoting complex subunit 5                                                                            |
| AI648759 |                                       | high mobility group box 1 /// similar to High mobility group protein 1 (HMG-1) (High mobility group protein B1) |
| BG075790 | Ppig                                  | peptidyl-prolyl isomerase G (cyclophilin G)                                                                     |
| AV167958 | 2700060E02Rik<br>/// LOC545536        | RIKEN cDNA 2700060E02 gene /// similar to RIKEN cDNA 2700060E02                                                 |
| AI414989 | Rps7                                  | ribosomal protein S7                                                                                            |

|          |                                             |                                                                                                                        |
|----------|---------------------------------------------|------------------------------------------------------------------------------------------------------------------------|
| BE200310 | Seps2                                       | Selenophosphate synthetase 2                                                                                           |
| AV023206 | Cox5b                                       | cytochrome c oxidase, subunit Vb                                                                                       |
| AW763751 | LOC277193 ///<br>LOC432650 ///<br>LOC432898 | similar to BC005512 protein /// hypothetical LOC432650 ///<br>similar to BC005512 protein                              |
| BQ042894 | Ubb                                         | ubiquitin B                                                                                                            |
| AW907444 | Rps18                                       | ribosomal protein S18                                                                                                  |
| BF318654 | Tdg ///<br>LOC434200 ///<br>LOC545124       | thymine DNA glycosylase /// similar to Thymine DNA glycosylase<br>/// similar to Thymine DNA glycosylase               |
| C77643   | Rpl12 ///<br>LOC432518 ///<br>LOC436225     | ribosomal protein L12 /// similar to 60S ribosomal protein L12 ///<br>similar to 60S ribosomal protein L12             |
| AV172216 | Atp6v0c                                     | ATPase, H <sup>+</sup> transporting, V0 subunit C                                                                      |
| C79043   | Rims2                                       | Regulating synaptic membrane exocytosis 2                                                                              |
| BF228007 | Rpl17                                       | ribosomal protein L17                                                                                                  |
| BB148221 | Csprs                                       | component of Sp100-rs                                                                                                  |
| C81225   |                                             | ribosomal protein S6 /// similar to 40S ribosomal protein S6                                                           |
| AI324936 | Rpl13a ///<br>Zfp526                        | ribosomal protein L13a /// zinc finger protein 526                                                                     |
| AI893877 | Rpl29 ///<br>LOC433350 ///<br>LOC433941     | ribosomal protein L29 /// similar to ribosomal protein /// similar to<br>ribosomal protein                             |
| AV004977 | Rps24                                       | ribosomal protein S24                                                                                                  |
| AV053864 | Hbxip                                       | hepatitis B virus x interacting protein                                                                                |
| AA798895 |                                             | CCR4 carbon catabolite repression 4-like ( <i>S. cerevisiae</i> ) /// similar<br>to hypothetical protein PC403257.00.0 |
| AW824211 | 1110032D12Rik                               | RIKEN cDNA 1110032D12 gene                                                                                             |
| BE368859 | Rps14                                       | ribosomal protein S14                                                                                                  |
| BB066603 | Cnot4                                       | CCR4-NOT transcription complex, subunit 4                                                                              |
| AV150377 | Rpl14                                       | ribosomal protein L14                                                                                                  |
| BB422726 | Rpl18                                       | ribosomal protein L18                                                                                                  |
| AW537707 | Actb                                        | actin, beta, cytoplasmic                                                                                               |
| BQ127746 | Rps8                                        | ribosomal protein S8                                                                                                   |
| AV021552 | Ywhab                                       | tyrosine 3-monooxygenase/tryptophan 5-monooxygenase<br>activation protein, beta polypeptide                            |
| BG072739 | Sox11                                       | SRY-box containing gene 11                                                                                             |
| AV100078 | Spin                                        | spindlin                                                                                                               |
| AW558862 |                                             | hexokinase 1 /// ribosomal protein L17 /// similar to Rpl17 protein                                                    |
| AV124739 | Rpl35                                       | ribosomal protein L35                                                                                                  |
| AV024540 | LOC546165                                   | similar to 14-3-3 protein theta-subtype                                                                                |
| BM210336 | Slc25a5                                     | solute carrier family 25 (mitochondrial carrier, adenine nucleotide<br>translocator), member 5                         |
| BB218107 | Laptm5                                      | lysosomal-associated protein transmembrane 5                                                                           |
| AV110835 | Rpl31                                       | ribosomal protein L31                                                                                                  |
| BB504983 | 4933439C20Rik<br>/// Pisd                   | RIKEN cDNA 4933439C20 gene /// phosphatidylserine<br>decarboxylase                                                     |
| AV216608 | Gng5                                        | guanine nucleotide binding protein (G protein), gamma 5 subunit                                                        |
| AV068352 | Tceb2                                       | transcription elongation factor B (SIII), polypeptide 2                                                                |
| BB100384 | Ywhaz                                       | tyrosine 3-monooxygenase/tryptophan 5-monooxygenase<br>activation protein, zeta polypeptide                            |

|          |                                         |                                                                                                                                                                                       |
|----------|-----------------------------------------|---------------------------------------------------------------------------------------------------------------------------------------------------------------------------------------|
| AV124660 | Rpl26                                   | ribosomal protein L26                                                                                                                                                                 |
| AU019414 | Rpl18                                   | ribosomal protein L18                                                                                                                                                                 |
| AV307521 | Rnps1                                   | ribonucleic acid binding protein S1                                                                                                                                                   |
| AV296751 | Psm11                                   | proteasome (prosome, macropain) 26S subunit, non-ATPase, 11                                                                                                                           |
| AV303037 | Hnrpf                                   | Heterogeneous nuclear ribonucleoprotein F                                                                                                                                             |
| AV150884 | Hadhb                                   | hydroxyacyl-Coenzyme A dehydrogenase/3-ketoacyl-Coenzyme A thiolase/enoyl-Coenzyme A hydratase (trifunctional protein), beta subunit                                                  |
| BE824567 | 6530403A03Rik                           | RIKEN cDNA 6530403A03 gene                                                                                                                                                            |
| AV148480 | Tmsb10                                  | thymosin, beta 10                                                                                                                                                                     |
| BG797423 | 1110001C20Rik                           | RIKEN cDNA 1110001C20 gene                                                                                                                                                            |
| AV060902 | Ela3b                                   | elastase 3B, pancreatic                                                                                                                                                               |
| AV216244 | Rps29                                   | ribosomal protein S29                                                                                                                                                                 |
| AV167877 | 2700060E02Rik                           | RIKEN cDNA 2700060E02 gene                                                                                                                                                            |
| BB315985 | Fbxw11                                  | F-box and WD-40 domain protein 11                                                                                                                                                     |
| C77384   | Hspca ///<br>LOC544800 ///<br>LOC545508 | heat shock protein 1, alpha /// similar to heat shock protein 1, alpha /// similar to Heat shock protein HSP 90-alpha (HSP 86) (Tumor specific transplantation 86 kDa antigen) (TSTA) |
| BB724547 | Rps17                                   | ribosomal protein S17                                                                                                                                                                 |
| AU019880 | ---                                     | ---                                                                                                                                                                                   |
| BB756908 | Cnot4                                   | CCR4-NOT transcription complex, subunit 4                                                                                                                                             |
| AA419672 | Rps8                                    | ribosomal protein S8                                                                                                                                                                  |
| AV216768 | Phgdh ///<br>LOC546010                  | 3-phosphoglycerate dehydrogenase /// similar to 3-phosphoglycerate dehydrogenase                                                                                                      |
| BB519474 | Odc1 ///<br>LOC545783 ///<br>LOC546355  | ornithine decarboxylase, structural 1 /// similar to Ornithine decarboxylase (ODC) /// similar to Ornithine decarboxylase (ODC)                                                       |
| BG141806 | ---                                     | Transcribed locus                                                                                                                                                                     |
| BM570679 | Tmem4                                   | transmembrane protein 4                                                                                                                                                               |
| BM115860 | Lpp                                     | LIM domain containing preferred translocation partner in lipoma                                                                                                                       |
| BM115860 |                                         | mortality factor 4 like 1 /// similar to mortality factor 4 like 1 /// similar to histone acetylase complex subunit MRG15-2                                                           |
| BB214894 | Rnps1                                   | ribonucleic acid binding protein S1                                                                                                                                                   |
| BF384094 | Eif5a                                   | eukaryotic translation initiation factor 5A                                                                                                                                           |
| C77655   | ---                                     | PREDICTED: Mus musculus similar to protease (LOC434722), mRNA                                                                                                                         |
| AV376276 | 3110048L19Rik<br>///<br>6330416L07Rik   | RIKEN cDNA 3110048L19 gene /// RIKEN cDNA 6330416L07 gene                                                                                                                             |
| AI854630 | Epha5                                   | Eph receptor A5                                                                                                                                                                       |
| C87154   | Rpl23a                                  | ribosomal protein L23a                                                                                                                                                                |
| C87154   | Rpl23a                                  | ribosomal protein L23a                                                                                                                                                                |
| BB530740 | Tef                                     | thyrotroph embryonic factor                                                                                                                                                           |
| BG966742 | ---                                     | Similar to development- and differentiation-enhancing factor 2; PYK2 C terminus-associated protein                                                                                    |
| BB279158 | 2310028N02Rik                           | RIKEN cDNA 2310028N02 gene                                                                                                                                                            |
| AV003424 | H2afz                                   | H2A histone family, member Z                                                                                                                                                          |
| AV003424 | H2afz ///<br>LOC544879                  | H2A histone family, member Z /// similar to H2A histone family, member Z                                                                                                              |
| BG065705 | ---                                     | ---                                                                                                                                                                                   |
| BB464359 | Mcm7                                    | minichromosome maintenance deficient 7 (S. cerevisiae)                                                                                                                                |

|          |                                        |                                                                                                                                                                                |
|----------|----------------------------------------|--------------------------------------------------------------------------------------------------------------------------------------------------------------------------------|
| AV110879 | Rpl14                                  | ribosomal protein L14                                                                                                                                                          |
| AV148464 | Rpl14                                  | ribosomal protein L14                                                                                                                                                          |
| AV305101 |                                        | phosphoglycerate kinase 1 /// similar to Pgk1 protein                                      |
| AV057789 | 1100001I22Rik<br>/// MGC103270         | RIKEN cDNA 1100001I22 gene /// ribosomal protein L34                                                                                                                           |
| BB043450 | Ptp4a1 ///<br>LOC433406                | protein tyrosine phosphatase 4a1 /// protein tyrosine phosphatase 4a1-like                                                                                                     |
| BI900577 | Rps10 ///<br>LOC545151                 | ribosomal protein S10 /// similar to ribosomal protein S10                                                                                                                     |
| C81193   | Odc1 ///<br>LOC545783 ///<br>LOC546355 | ornithine decarboxylase, structural 1 /// similar to Ornithine decarboxylase (ODC) /// similar to Ornithine decarboxylase (ODC)                                                |
| AI642440 | Rps13                                  | Ribosomal protein S13                                                                                                                                                          |
| AV037157 | Rps29                                  | ribosomal protein S29                                                                                                                                                          |
| AV170171 | Hmgn1                                  | high mobility group nucleosomal binding domain 1                                                                                                                               |
| BB359521 | ---                                    | ---                                                                                                                                                                            |
| AV064451 | Rps17                                  | ribosomal protein S17                                                                                                                                                          |
| AV301634 | Adipor1                                | adiponectin receptor 1                                                                                                                                                         |
| AV329790 | 6330505N24Rik                          | RIKEN cDNA 6330505N24 gene                                                                                                                                                     |
| BI251603 | D11Ert498e                             | DNA segment, Chr 11, ERATO Doi 498, expressed                                                                                                                                  |
| BB006121 | 4933439C20Rik                          | RIKEN cDNA 4933439C20 gene                                                                                                                                                     |
| BB006121 | 4933439C20Rik<br>/// Pisd              | RIKEN cDNA 4933439C20 gene /// phosphatidylserine decarboxylase                                                                                                                |
| BB822587 | Tnrc6a                                 | trinucleotide repeat containing 6a                                                                                                                                             |
| AV111335 | 2610524G07Rik                          | RIKEN cDNA 2610524G07 gene                                                                                                                                                     |
| BB032885 | Eif3s6                                 | eukaryotic translation initiation factor 3, subunit 6                                                                                                                          |
| AV296285 | 1700051C09Rik                          | RIKEN cDNA 1700051C09 gene                                                                                                                                                     |
| AV094989 | Morf4l2                                | mortality factor 4 like 2                                                                                                                                                      |
| AV122231 | Morf4l2 ///<br>LOC433261               | mortality factor 4 like 2 /// similar to MORF-related gene X                                                                                                                   |
| AV084012 | 1110005A23Rik                          | RIKEN cDNA 1110005A23 gene                                                                                                                                                     |
| BB407163 | Dnpep                                  | aspartyl aminopeptidase                                                                                                                                                        |
| AV127023 |                                        | high mobility group box 1 /// similar to High mobility group protein 1 (HMG-1) (High mobility group protein B1)                                                                |
| AV324314 | 6230421P05Rik                          | RIKEN cDNA 6230421P05 gene                                                                                                                                                     |
| AW538657 | Wdr75                                  | WD repeat domain 75                                                                                                                                                            |
| BG067993 | ---                                    | ---                                                                                                                                                                            |
| C77609   | C77609                                 | expressed sequence C77609                                                                                                                                                      |
| BG063240 |                                        | similar to protease /// similar to protease /// similar to protease                                                                                                            |
| BB107628 | Ppp2r5e                                | Protein phosphatase 2, regulatory subunit B (B56), epsilon isoform                                                                                                             |
| BB260383 | Nucks1                                 | nuclear casein kinase and cyclin-dependent kinase substrate 1                                                                                                                  |
| BG066461 | C79246                                 | expressed sequence C79246                                                                                                                                                      |
| BG066044 | C77815                                 | expressed sequence C77815                                                                                                                                                      |
| BB710064 |                                        | gene model 428, (NCBI) /// similar to hypothetical protein 4930503F14 /// similar to hypothetical protein 4930503F14 /// similar to novel protein /// similar to novel protein |
| C79326   | 1110008P14Rik                          | RIKEN cDNA 1110008P14 gene                                                                                                                                                     |
| BG078932 | C76336                                 | expressed sequence C76336                                                                                                                                                      |
| BG963792 | ---                                    | ---                                                                                                                                                                            |
| BG078857 | ---                                    | ---                                                                                                                                                                            |

|           |                       |                                                                                                                                                                                   |
|-----------|-----------------------|-----------------------------------------------------------------------------------------------------------------------------------------------------------------------------------|
| NM_023144 | Nono                  | non-POU-domain-containing, octamer binding protein                                                                                                                                |
| NM_009080 | Rpl26                 | ribosomal protein L26                                                                                                                                                             |
| NM_019643 | MGI:1929091           | teratocarcinoma expressed, serine rich                                                                                                                                            |
| NM_052835 | Rpl10                 | ribosomal protein 10                                                                                                                                                              |
| NM_025596 | 2610524G07Rik         | RIKEN cDNA 2610524G07 gene                                                                                                                                                        |
| NM_011289 | Rpl27                 | ribosomal protein L27                                                                                                                                                             |
| NM_009829 | Ccnd2                 | cyclin D2                                                                                                                                                                         |
| NM_011847 | Dnajb6                | DnaJ (Hsp40) homolog, subfamily B, member 6                                                                                                                                       |
| BF166000  |                       | high mobility group box 1 /// RIKEN cDNA 4932431P20 gene /// high mobility group box 1-like /// similar to High mobility group protein 1 (HMG-1) (High mobility group protein B1) |
| NM_011029 | Lamr1                 | laminin receptor 1 (ribosomal protein SA)                                                                                                                                         |
| NM_008228 | Hdac1                 | histone deacetylase 1                                                                                                                                                             |
| NM_025523 | Ndufc1                | NADH dehydrogenase (ubiquinone) 1, subcomplex unknown, 1                                                                                                                          |
| BE981338  | Gpiap1                | GPI-anchored membrane protein 1                                                                                                                                                   |
| NM_026506 | Snrpg                 | small nuclear ribonucleoprotein polypeptide G                                                                                                                                     |
| NM_031878 | Smarcd2               | SWI/SNF related, matrix associated, actin dependent regulator of chromatin, subfamily d, member 2                                                                                 |
| NM_013608 | Naca ///<br>LOC432684 | nascent polypeptide-associated complex alpha polypeptide /// similar to alpha NAC/1.9.2. protein                                                                                  |
| NM_011184 | Psma3                 | proteasome (prosome, macropain) subunit, alpha type 3                                                                                                                             |
| NM_011561 | Tdg                   | thymine DNA glycosylase                                                                                                                                                           |
| NM_009665 | Amd1                  | S-adenosylmethionine decarboxylase 1                                                                                                                                              |
| BC018354  | ---                   | Mus musculus, Similar to heterochromatin-like protein 1, clone IMAGE:3493144, mRNA                                                                                                |
| NM_019682 | Dncl1                 | dynein, cytoplasmic, light chain 1                                                                                                                                                |
| BE287896  | Ier3ip1               | immediate early response 3 interacting protein 1                                                                                                                                  |
| NM_010490 |                       | CCR4 carbon catabolite repression 4-like ( <i>S. cerevisiae</i> ) /// intracisternal A particles /// pol polyprotein /// similar to hypothetical protein PC403257.00.0            |
| NM_011296 | Rps18                 | ribosomal protein S18                                                                                                                                                             |
| NM_025806 | 1100001H23Rik         | RIKEN cDNA 1100001H23 gene                                                                                                                                                        |
| NM_008705 | Nme2                  | expressed in non-metastatic cells 2, protein                                                                                                                                      |
| NM_009082 |                       | ribosomal protein L29 /// similar to ribosomal protein /// similar to ribosomal protein                                                                                           |
| NM_030702 | Senp3                 | SUMO/sentrin specific protease 3                                                                                                                                                  |
| NM_010054 | Dlx2                  | distal-less homeobox 2                                                                                                                                                            |
| BG066549  | Ube2l3                | ubiquitin-conjugating enzyme E2L 3                                                                                                                                                |
| BC020117  | Nfyc                  | nuclear transcription factor-Y gamma                                                                                                                                              |
| NM_011579 | Tgtp                  | T-cell specific GTPase                                                                                                                                                            |
| BB836888  | Ctcf                  | CCCTC-binding factor                                                                                                                                                              |
| NM_134471 | Kif2c                 | kinesin family member 2C                                                                                                                                                          |
| AK021111  | Stk3                  | serine/threonine kinase 3 (Ste20, yeast homolog)                                                                                                                                  |
| NM_010592 | Jund1                 | Jun proto-oncogene related gene d1                                                                                                                                                |
| NM_010178 | Fusip1                | FUS interacting protein (serine-arginine rich) 1                                                                                                                                  |
| NM_009690 | Cd5l                  | CD5 antigen-like                                                                                                                                                                  |
| NM_024277 | Rps27a                | ribosomal protein S27a                                                                                                                                                            |
| NM_025586 | Rpl15                 | ribosomal protein L15                                                                                                                                                             |
| NM_013762 | Rpl3                  | ribosomal protein L3                                                                                                                                                              |
| BM234652  | Ero1l ///             | ERO1-like ( <i>S. cerevisiae</i> ) /// hypothetical gene supported by                                                                                                             |

|           |                         |                                                                                                     |
|-----------|-------------------------|-----------------------------------------------------------------------------------------------------|
|           | LOC434220               | AK009667; NM_015774                                                                                 |
| NM_011664 | Ubb                     | ubiquitin B                                                                                         |
| BB436326  | Mfap1                   | microfibrillar-associated protein 1                                                                 |
| NM_009220 |                         | spermiogenesis specific transcript on the Y 1 /// similar to Y-linked testis-specific protein       |
| NM_032000 | Trps1                   | trichorhinophalangeal syndrome I (human)                                                            |
| NM_133358 | Zfp617                  | zinc finger protein 617                                                                             |
| NM_020564 | Sult5a1                 | sulfotransferase family 5A, member 1                                                                |
| BC010820  | Atoh1                   | atonal homolog 1 (Drosophila)                                                                       |
| NM_028570 | 1700091H14Rik           | RIKEN cDNA 1700091H14 gene                                                                          |
| NM_011160 | Prkg1                   | protein kinase, cGMP-dependent, type I                                                              |
| NM_007496 | Atbf1                   | AT motif binding factor 1                                                                           |
| NM_011765 | Zfp97 ///<br>BC018101   | zinc finger protein 97 /// cDNA sequence BC018101                                                   |
| NM_130883 | AF119384                | cDNA sequence AF119384                                                                              |
| BG065754  | Ccng1                   | cyclin G1                                                                                           |
| AW259474  | Ighmbp2                 | immunoglobulin mu binding protein 2                                                                 |
| NM_013636 | Ppp1cc ///<br>LOC434233 | protein phosphatase 1, catalytic subunit, gamma isoform /// similar to protein phosphatase 1 gamma2 |
| NM_016738 | Rpl13                   | ribosomal protein L13                                                                               |
| NM_008826 | Pfkf1                   | phosphofructokinase, liver, B-type                                                                  |
| NM_030736 | V1rd14                  | vomeranase 1 receptor, D14                                                                          |
| NM_027639 | 4931432E15Rik           | RIKEN cDNA 4931432E15 gene                                                                          |
| NM_009493 | V2r4 /// V2r5           | vomeranase 2, receptor, 4 /// vomeronase 2, receptor, 5                                             |
| NM_008478 | L1cam                   | L1 cell adhesion molecule                                                                           |
| AB006320  | Pitx2                   | paired-like homeodomain transcription factor 2                                                      |
| AF285576  | Tex13                   | testis expressed gene 13                                                                            |
| NM_016668 | Bhmt                    | betaine-homocysteine methyltransferase                                                              |
| NM_007508 | Atp6v1a1                | ATPase, H <sup>+</sup> transporting, V1 subunit A, isoform 1                                        |
| AW554436  | Acp1                    | acid phosphatase 1, soluble                                                                         |
| NM_009519 | Wnt11                   | wingless-related MMTV integration site 11                                                           |
| NM_024267 | Ipo4                    | importin 4                                                                                          |
| AV107150  | Rpl39                   | ribosomal protein L39                                                                               |
| AV305633  | AW011752                | expressed sequence AW011752                                                                         |
| BB819942  | Apln                    | apelin                                                                                              |
| BC027208  | Rps25                   | ribosomal protein S25                                                                               |
| BC005552  | Asns                    | asparagine synthetase                                                                               |
| BC010987  | Rps28                   | ribosomal protein S28                                                                               |
| BC024454  | Hnrpa3 ///<br>LOC547321 | heterogeneous nuclear ribonucleoprotein A3 /// similar to Hnrpa3 protein                            |
| BC008262  | Snrpe                   | small nuclear ribonucleoprotein E                                                                   |
| AF246235  | Pomt2                   | protein-O-mannosyltransferase 2                                                                     |
| BC019957  | D16Ertd472e             | DNA segment, Chr 16, ERATO Doi 472, expressed                                                       |
| BC012406  | Aph1a                   | anterior pharynx defective 1a homolog (C. elegans)                                                  |
| U58494    | ---                     | ---                                                                                                 |
| BC024416  | ---                     | MRNA similar to RIKEN cDNA 9030624G23 gene (cDNA clone MGC:36379 IMAGE:4988668), complete cds       |
| BC026804  | Osbpl2                  | oxysterol binding protein-like 2                                                                    |
| BC021506  | Hnrpnl1                 | heterogeneous nuclear ribonucleoprotein U-like 1                                                    |
| AF353993  | Tm2d1                   | TM2 domain containing 1                                                                             |

|          |                            |                                                                                       |
|----------|----------------------------|---------------------------------------------------------------------------------------|
| BI687658 | Prkar1a                    | protein kinase, cAMP dependent regulatory, type I, alpha                              |
| BI106821 | Asahl                      | N-acylsphingosine amidohydrolase (acid ceramidase)-like                               |
| BG293527 | 2600005C20Rik              | RIKEN cDNA 2600005C20 gene                                                            |
| BB628935 | Ank3 ///<br>2900054D09Rik  | ankyrin 3, epithelial /// RIKEN cDNA 2900054D09 gene                                  |
| AK010429 | Rnf135                     | ring finger protein 135                                                               |
| AA172344 | Itsn1                      | intersectin 1 (SH3 domain protein 1A)                                                 |
| BI248354 | AA536743                   | expressed sequence AA536743                                                           |
| AK004908 | Cxadr                      | coxsackievirus and adenovirus receptor                                                |
| BE196832 | 2810474O19Rik              | RIKEN cDNA 2810474O19 gene                                                            |
| AV306884 | Plce1                      | phospholipase C, epsilon 1                                                            |
| AJ007909 | MGI:2384747                | erythroid differentiation regulator 1                                                 |
| BF719154 | 1200016E24Rik              | RIKEN cDNA 1200016E24 gene                                                            |
| BB662083 | ---                        | ---                                                                                   |
| BI251153 | Helz                       | helicase with zinc finger domain                                                      |
| M73818   | ---                        | ---                                                                                   |
| AF047725 | Cyp2c38                    | cytochrome P450, family 2, subfamily c, polypeptide 38                                |
| BC001981 | Serf1                      | small EDRK-rich factor 1                                                              |
| X67668   | Hmgb2                      | high mobility group box 2                                                             |
| BC021831 | ---                        | Mus musculus, clone IMAGE:3983821, mRNA, partial cds                                  |
| AK014859 | Actr2                      | ARP2 actin-related protein 2 homolog (yeast)                                          |
| BF237074 | Uba52                      | ubiquitin A-52 residue ribosomal protein fusion product 1                             |
| BM195235 |                            | similar to hypothetical protein LOC67055 /// similar to hypothetical protein LOC67055 |
| AK019495 | Ddx10                      | DEAD (Asp-Glu-Ala-Asp) box polypeptide 10                                             |
| BE692399 | 2610005L07Rik              | RIKEN cDNA 2610005L07 gene                                                            |
| AV111459 | Rpl27                      | ribosomal protein L27                                                                 |
| AU018141 | E430024C06Rik              | RIKEN cDNA E430024C06 gene                                                            |
| AK007980 | Wnk2                       | WNK lysine deficient protein kinase 2                                                 |
| AK008386 | Rps24                      | ribosomal protein S24                                                                 |
| BM207059 | Rps15a                     | ribosomal protein S15a                                                                |
| BI737178 | 2610005L07Rik              | RIKEN cDNA 2610005L07 gene                                                            |
| AK003190 | Ubb                        | ubiquitin B                                                                           |
| BF578245 | Rpl37                      | ribosomal protein L37                                                                 |
| BI654600 | Pitpnc1                    | phosphatidylinositol transfer protein, cytoplasmic 1                                  |
| AV213405 |                            | ribosomal protein S6 /// similar to 40S ribosomal protein S6                          |
| AV110871 |                            | ribosomal protein L29 /// similar to ribosomal protein                                |
| BI694945 | Rpl41 ///<br>2210411K19Rik | ribosomal protein L41 /// RIKEN cDNA 2210411K19 gene                                  |
| BI654095 | Cggbp1                     | CGG triplet repeat binding protein 1                                                  |
| BQ176989 | Eif5                       | eukaryotic translation initiation factor 5                                            |
| AA561726 | Phgdh ///<br>LOC546010     | 3-phosphoglycerate dehydrogenase /// similar to 3-phosphoglycerate dehydrogenase      |
| AV206017 | Rps28                      | Ribosomal protein S28                                                                 |
| AV141160 | Wtap                       | Wilms' tumour 1-associating protein                                                   |
| BG295413 | 1110017O22Rik              | RIKEN cDNA 1110017O22 gene                                                            |
| AV066335 | Rpl35                      | ribosomal protein L35                                                                 |
| AV124394 | Rpl23                      | ribosomal protein L23                                                                 |
| BG976607 | Mtm1                       | X-linked myotubular myopathy gene 1                                                   |

|          |                                                            |                                                                                                                                                                                            |
|----------|------------------------------------------------------------|--------------------------------------------------------------------------------------------------------------------------------------------------------------------------------------------|
| BB540721 | Lrrc35                                                     | leucine rich repeat containing 35                                                                                                                                                          |
| BF659630 | Rpl13a                                                     | ribosomal protein L13a                                                                                                                                                                     |
| AU042749 | Morf411 ///<br>LOC225228 ///<br>LOC433598 ///<br>LOC433955 | mortality factor 4 like 1 /// similar to mortality factor 4 like 1 ///<br>similar to histone acetylase complex subunit MRG15-2 /// similar<br>to histone acetylase complex subunit MRG15-2 |
| BB704811 | Serf2                                                      | small EDRK-rich factor 2                                                                                                                                                                   |
| AI506565 | Rpl13                                                      | ribosomal protein L13                                                                                                                                                                      |
| AV018484 | Btbd1                                                      | BTB (POZ) domain containing 1                                                                                                                                                              |
| AI987693 | Ccrn4l                                                     | CCR4 carbon catabolite repression 4-like ( <i>S. cerevisiae</i> )                                                                                                                          |
| AU016948 | Rps8                                                       | ribosomal protein S8                                                                                                                                                                       |
| AA690930 |                                                            | ribosomal protein L29 /// similar to ribosomal protein /// similar to<br>60S ribosomal protein L29                                                                                         |
| BF228097 | Tomm20                                                     | translocase of outer mitochondrial membrane 20 homolog (yeast)                                                                                                                             |
| BG070759 | Ube2d3                                                     | ubiquitin-conjugating enzyme E2D 3 (UBC4/5 homolog, yeast)                                                                                                                                 |
| BG070759 | Ube2d3                                                     | ubiquitin-conjugating enzyme E2D 3 (UBC4/5 homolog, yeast)                                                                                                                                 |
| AI324936 | Rpl13a                                                     | ribosomal protein L13a                                                                                                                                                                     |
| AI415136 | Rps18                                                      | ribosomal protein S18                                                                                                                                                                      |
| AV117525 | Rps17                                                      | ribosomal protein S17                                                                                                                                                                      |
| AI450929 | Rps6 ///<br>LOC434404 ///<br>LOC545640                     | ribosomal protein S6 /// similar to 40S ribosomal protein S6 ///<br>similar to 40S ribosomal protein S6                                                                                    |
| BI158381 | Slc29a3                                                    | solute carrier family 29 (nucleoside transporters), member 3                                                                                                                               |
| BE197350 | Morf411                                                    | mortality factor 4 like 1                                                                                                                                                                  |
| AV005827 | Rpl21                                                      | ribosomal protein L21                                                                                                                                                                      |
| BB453676 | Hspa8 ///<br>LOC432883 ///<br>LOC545316                    | heat shock protein 8 /// similar to heat shock protein 8 /// similar to<br>heat shock protein                                                                                              |
| AV021552 | Ywhab                                                      | tyrosine 3-monooxygenase/tryptophan 5-monooxygenase<br>activation protein, beta polypeptide                                                                                                |
| AV139821 | Tax1bp3 ///<br>Rpl13                                       | Tax1 (human T-cell leukemia virus type I) binding protein 3 ///<br>ribosomal protein L13                                                                                                   |
| BB794742 | ---                                                        | ---                                                                                                                                                                                        |
| BF464696 | Hmgn1                                                      | high mobility group nucleosomal binding domain 1                                                                                                                                           |
| BI651113 | ---                                                        | ---                                                                                                                                                                                        |
| AV172221 | Rpl35                                                      | ribosomal protein L35                                                                                                                                                                      |
| BB041005 | Snx17                                                      | sorting nexin 17                                                                                                                                                                           |
| AV310588 | Ccnd2                                                      | cyclin D2                                                                                                                                                                                  |
| AA409396 | 1110032D12Rik                                              | RIKEN cDNA 1110032D12 gene                                                                                                                                                                 |
| AV155488 | Cyts                                                       | cytochrome c, somatic                                                                                                                                                                      |
| AV006937 | Dncl1                                                      | dynein, cytoplasmic, light chain 1                                                                                                                                                         |
| BB767552 | Morf411                                                    | mortality factor 4 like 1                                                                                                                                                                  |
| BG065719 | X83313                                                     | EST X83313                                                                                                                                                                                 |
| AV309800 | ---                                                        | ---                                                                                                                                                                                        |
| BI466259 | 1700022C02Rik                                              | RIKEN cDNA 1700022C02 gene                                                                                                                                                                 |
| AV046829 | Rps20                                                      | ribosomal protein S20                                                                                                                                                                      |
| AV002845 | Rps20                                                      | ribosomal protein S20                                                                                                                                                                      |
| BG072319 | ---                                                        | ---                                                                                                                                                                                        |
| BI900577 | Rps10                                                      | ribosomal protein S10                                                                                                                                                                      |
| AV218207 | Cox5b                                                      | cytochrome c oxidase, subunit Vb                                                                                                                                                           |



|           |                          |                                                                                                                                 |
|-----------|--------------------------|---------------------------------------------------------------------------------------------------------------------------------|
| AA867746  | Falz                     | fetal Alzheimer antigen                                                                                                         |
| AV111319  | Rps24                    | ribosomal protein S24                                                                                                           |
| AW909306  | ---                      | ---                                                                                                                             |
| AV217426  | Hnrpf ///<br>LOC544823   | heterogeneous nuclear ribonucleoprotein F /// similar to heterogeneous nuclear ribonucleoprotein F                              |
| AA561825  | A730098D12Rik            | RIKEN cDNA A730098D12 gene                                                                                                      |
| BB068032  | Morf4l2 ///<br>LOC433261 | mortality factor 4 like 2 /// similar to MORF-related gene X                                                                    |
| AV229195  | ---                      | Transcribed locus                                                                                                               |
| BG066238  | C78549                   | expressed sequence C78549                                                                                                       |
| BB430212  | Suhw4                    | suppressor of hairy wing homolog 4 (Drosophila)                                                                                 |
| BG066533  | ---                      | ---                                                                                                                             |
| BG067993  | ---                      | ---                                                                                                                             |
| C78891    | C78891                   | expressed sequence C78891                                                                                                       |
| BG066263  | C78651                   | expressed sequence C78651                                                                                                       |
| BG065684  | C76472                   | expressed sequence C76472                                                                                                       |
| AA543171  | 2810021G02Rik            | RIKEN cDNA 2810021G02 gene                                                                                                      |
| NM_009092 | Rps17                    | ribosomal protein S17                                                                                                           |
| AV109882  | Rpl31                    | ribosomal protein L31                                                                                                           |
| NM_024175 | Rps23                    | ribosomal protein S23                                                                                                           |
| BC014783  | Psm3 ///<br>LOC240289    | proteasome (prosome, macropain) subunit, beta type 3 /// similar to proteasome subunit C10-II                                   |
| BC002110  | Rpl24                    | ribosomal protein L24                                                                                                           |
| NM_010654 | Klrd1                    | killer cell lectin-like receptor, subfamily D, member 1                                                                         |
| M55219    | Csprs                    | component of Sp100-rs                                                                                                           |
| AF277898  | Egfr                     | epidermal growth factor receptor                                                                                                |
| AK004547  | Cdc5l                    | cell division cycle 5-like ( <i>S. pombe</i> )                                                                                  |
| AV066985  | Rpl37a                   | ribosomal protein L37a                                                                                                          |
| BB531820  | Thrap3                   | thyroid hormone receptor associated protein 3                                                                                   |
| AI506565  |                          | ribosomal protein L13 /// similar to 60S ribosomal protein /// similar to 60S ribosomal protein L13                             |
| BB422130  | Ywhaq                    | tyrosine 3-monooxygenase/tryptophan 5-monooxygenase activation protein, theta polypeptide                                       |
| BC025918  | Rpl23                    | ribosomal protein L23                                                                                                           |
| BB787289  | 2410195B05Rik            | RIKEN cDNA 2410195B05 gene                                                                                                      |
| BG069991  | ---                      | ---                                                                                                                             |
| BB344838  | ---                      | 10 days neonate cerebellum cDNA, RIKEN full-length enriched library, clone:B930053I10 product:unknown EST, full insert sequence |
| BG083989  | ---                      | ---                                                                                                                             |
| AK008952  | P2ry5                    | purinergic receptor P2Y, G-protein coupled, 5                                                                                   |
| AW012413  | Pin4                     | protein (peptidyl-prolyl cis/trans isomerase) NIMA-interacting, 4 (parvulin)                                                    |
| AW215497  | 2610305J24Rik            | RIKEN cDNA 2610305J24 gene                                                                                                      |
| C85657    | A130040M12Rik            | RIKEN cDNA A130040M12 gene                                                                                                      |
| AK003403  | 1110004B13Rik            | RIKEN cDNA 1110004B13 gene                                                                                                      |
| AK016563  | D2Ert435e                | DNA segment, Chr 2, ERATO Doi 435, expressed                                                                                    |
| AK018693  | Ubr2                     | ubiquitin protein ligase E3 component n-recogin 2                                                                               |
| BB465134  | E130119J07Rik            | RIKEN cDNA E130119J07 gene                                                                                                      |
| AK006257  | 1700023A16Rik            | RIKEN cDNA 1700023A16 gene                                                                                                      |

|          |               |                                                                                             |
|----------|---------------|---------------------------------------------------------------------------------------------|
| BB767069 | Zbtb4         | zinc finger and BTB domain containing 4                                                     |
| BB462518 | Syt11         | synaptotagmin XI                                                                            |
| AK012880 | 2610005L07Rik | RIKEN cDNA 2610005L07 gene                                                                  |
| AK006975 | Speer4b       | spermatogenesis associated glutamate (E)-rich protein 4b                                    |
| AK006975 | Speer4b       | spermatogenesis associated glutamate (E)-rich protein 4b                                    |
| BB207765 | 6330417A16Rik | RIKEN cDNA 6330417A16 gene                                                                  |
| AK016826 | Slbp          | stem-loop binding protein                                                                   |
| AK021390 | Hells         | helicase, lymphoid specific                                                                 |
| AK019115 | 2410039E07Rik | RIKEN cDNA 2410039E07 gene                                                                  |
| AK017802 | 4833420G17Rik | RIKEN cDNA 4833420G17 gene                                                                  |
| AK008821 | Cldn22        | claudin 22                                                                                  |
| AK007850 | Rps21         | ribosomal protein S21                                                                       |
| BF318506 | 1700023B23Rik | RIKEN cDNA 1700023B23 gene                                                                  |
| AK019934 | 1500041B16Rik | RIKEN cDNA 1500041B16 gene                                                                  |
| AV262227 | 4930444G20Rik | RIKEN cDNA 4930444G20 gene                                                                  |
| BM239430 | 4833416J08Rik | RIKEN cDNA 4833416J08 gene                                                                  |
| AK016695 | 4933406J08Rik | RIKEN cDNA 4933406J08 gene                                                                  |
| AK017111 | 4933438K21Rik | RIKEN cDNA 4933438K21 gene                                                                  |
| AK019407 | Fbxo44        | : F-box protein 44                                                                          |
| BG066234 | C430045I18Rik | RIKEN cDNA C430045I18 gene                                                                  |
| BB016642 | 4930563E22Rik | RIKEN cDNA 4930563E22 gene                                                                  |
| AV278455 | 4933402C05Rik | RIKEN cDNA 4933402C05 gene                                                                  |
| AK008824 | Nudt7         | nudix (nucleoside diphosphate linked moiety X)-type motif 7                                 |
| AK018301 | Slc9a8        | solute carrier family 9 (sodium/hydrogen exchanger), member 8                               |
| BB019121 | Cml3          | camello-like 3                                                                              |
| BE373131 | 9530053H05Rik | RIKEN cDNA 9530053H05 gene                                                                  |
| BB664131 | 6720427H10Rik | RIKEN cDNA 6720427H10 gene                                                                  |
| BG807740 | 1500019C06Rik | RIKEN cDNA 1500019C06 gene                                                                  |
| BG078690 | Pla2g6        | phospholipase A2, group VI                                                                  |
| AK016672 | Speer7-ps1    | spermatogenesis associated glutamate (E)-rich protein 7, pseudogene 1                       |
| BF783360 | Trpm7         | transient receptor potential cation channel, subfamily M, member 7                          |
| BC026878 | 2810047C21Rik | RIKEN cDNA 2810047C21 gene                                                                  |
| AK012902 | 5730446D14Rik | RIKEN cDNA 5730446D14 gene                                                                  |
| BI319712 | Adams9        | a disintegrin-like and metalloprotease (repolysin type) with thrombospondin type 1 motif, 9 |
| AK016652 | 4933404K08Rik | RIKEN cDNA 4933404K08 gene                                                                  |
| BF227338 | ---           | ---                                                                                         |
| AK016081 | 4930549O18Rik | RIKEN cDNA 4930549O18 gene                                                                  |
| AK012982 | 2810404F17Rik | RIKEN cDNA 2810404F17 gene                                                                  |
| AK016444 | 4931408D14Rik | RIKEN cDNA 4931408D14 gene                                                                  |
| AK005891 | 1700012B15Rik | RIKEN cDNA 1700012B15 gene                                                                  |
| AK018513 | 9030417H13Rik | RIKEN cDNA 9030417H13 gene                                                                  |
| AK013928 | 3100003M19Rik | RIKEN cDNA 3100003M19 gene                                                                  |
| AK005492 | Psg21         | pregnancy-specific glycoprotein 21                                                          |
| AK015147 | ---           | ---                                                                                         |
| AK014779 | 4833427F10Rik | RIKEN cDNA 4833427F10 gene                                                                  |
| AK016020 | 4930542D17Rik | RIKEN cDNA 4930542D17 gene                                                                  |
| AK020418 | 9430014N10Rik | RIKEN cDNA 9430014N10 gene                                                                  |

|          |                                       |                                                                                           |
|----------|---------------------------------------|-------------------------------------------------------------------------------------------|
| AK021377 | 9430065F17Rik                         | RIKEN cDNA 9430065F17 gene                                                                |
| AK017761 | 5730510P18Rik                         | RIKEN cDNA 5730510P18 gene                                                                |
| AK016812 | 4933414I06Rik                         | RIKEN cDNA 4933414I06 gene                                                                |
| AK006176 | 1700020M10Rik                         | RIKEN cDNA 1700020M10 gene                                                                |
| AK018881 | 1700066C05Rik                         | RIKEN cDNA 1700066C05 gene                                                                |
| AA544511 | Rshl2                                 | radial spokehead-like 2                                                                   |
| AW912387 | 4930573O21Rik                         | RIKEN cDNA 4930573O21 gene                                                                |
| BE381593 | 4933411E06Rik                         | RIKEN cDNA 4933411E06 gene                                                                |
| AK011583 | Itgav                                 | integrin alpha V                                                                          |
| AK017425 | 5530400K19Rik                         | RIKEN cDNA 5530400K19 gene                                                                |
| AK015390 | 4930445G23Rik                         | RIKEN cDNA 4930445G23 gene                                                                |
| AK014733 | 4833420D23Rik                         | RIKEN cDNA 4833420D23 gene                                                                |
| AK017949 | 5830426K05Rik                         | RIKEN cDNA 5830426K05 gene                                                                |
| AK012300 | Ywhaq                                 | tyrosine 3-monooxygenase/tryptophan 5-monooxygenase activation protein, theta polypeptide |
| AK019501 | 4632418H02Rik                         | RIKEN cDNA 4632418H02 gene                                                                |
| AK016539 | 4932431P20Rik                         | RIKEN cDNA 4932431P20 gene                                                                |
| AK014604 | 4632432E15Rik                         | RIKEN cDNA 4632432E15 gene                                                                |
| AK018498 | 9030409K20Rik                         | RIKEN cDNA 9030409K20 gene                                                                |
| AK019801 | 4933406F09Rik                         | RIKEN cDNA 4933406F09 gene                                                                |
| AK019930 | 5330433J24Rik                         | RIKEN cDNA 5330433J24 gene                                                                |
| AK009671 | 2310038E17Rik                         | RIKEN cDNA 2310038E17 gene                                                                |
| AK015425 | ---                                   | ---                                                                                       |
| AK017428 | 5530400N10Rik                         | RIKEN cDNA 5530400N10 gene                                                                |
| AK016790 | 4933412F11Rik<br>///<br>4930529H12Rik | RIKEN cDNA 4933412F11 gene /// RIKEN cDNA 4930529H12 gene                                 |
| AK011377 | 2610011I18Rik                         | RIKEN cDNA 2610011I18 gene                                                                |
| AK017968 | 5830433M15Rik                         | RIKEN cDNA 5830433M15 gene                                                                |
| AK015786 | 4930513N20Rik                         | RIKEN cDNA 4930513N20 gene                                                                |
| AK018087 | 6230414M07Rik                         | RIKEN cDNA 6230414M07 gene                                                                |
| AK018087 | 6230414M07Rik                         | RIKEN cDNA 6230414M07 gene                                                                |
| AK018017 | 5830456J23Rik                         | RIKEN cDNA 5830456J23 gene                                                                |
| AK014197 | 3110049I03Rik                         | RIKEN cDNA 3110049I03 gene                                                                |
| AK020543 | 9530004M16Rik                         | RIKEN cDNA 9530004M16 gene                                                                |
| AK015935 | 4930529H12Rik                         | RIKEN cDNA 4930529H12 gene                                                                |
| AK015935 | 4930529H12Rik                         | RIKEN cDNA 4930529H12 gene                                                                |
| AK007074 | ---                                   | ---                                                                                       |
| AK007074 | 1700095A21Rik                         | RIKEN cDNA 1700095A21 gene                                                                |
| AK018374 | 8430401P03Rik                         | RIKEN cDNA 8430401P03 gene                                                                |
| AK005121 | 1500002K03Rik                         | RIKEN cDNA 1500002K03 gene                                                                |
| BB234337 | AI467606                              | expressed sequence AI467606                                                               |
| AV316216 | 5830434P21Rik                         | RIKEN cDNA 5830434P21 gene                                                                |
| AV089797 | C030048B08Rik                         | RIKEN cDNA C030048B08 gene                                                                |
| AV152395 | BC024659                              | cDNA sequence BC024659                                                                    |
| BF322785 | Mup1                                  | major urinary protein 1                                                                   |
| BB038251 | MGI:105968                            | taxilin                                                                                   |
| AV341198 | Adar                                  | adenosine deaminase, RNA-specific                                                         |
| BB754142 | ---                                   | ---                                                                                       |

|          |                                |                                                                                                                                     |
|----------|--------------------------------|-------------------------------------------------------------------------------------------------------------------------------------|
| BB148972 | 9930116O05Rik                  | RIKEN cDNA 9930116O05 gene                                                                                                          |
| BM208085 | Plekhg3                        | pleckstrin homology domain containing, family G (with RhoGef domain) member 3                                                       |
| BB121003 | 0610039J04Rik                  | RIKEN cDNA 0610039J04 gene                                                                                                          |
| AV232599 | Sypl                           | synaptophysin-like protein                                                                                                          |
| BB200607 | C730049O14Rik                  | RIKEN cDNA C730049O14 gene                                                                                                          |
| AV227324 | Podn                           | podocan                                                                                                                             |
| BG066901 | ---                            | ---                                                                                                                                 |
| BB041868 | A430108E01Rik                  | RIKEN cDNA A430108E01 gene                                                                                                          |
| AV373814 | Taf4b                          | TAF4B RNA polymerase II, TATA box binding protein (TBP)-associated factor                                                           |
| BI736050 | ---                            | ---                                                                                                                                 |
| BG064099 | Braf                           | Braf transforming gene                                                                                                              |
| BE951647 | C230096C10Rik                  | RIKEN cDNA C230096C10 gene                                                                                                          |
| AV078506 | LOC434456                      | hypothetical gene supported by AK019108; NM_183133                                                                                  |
| BQ175029 | LOC547272                      | hypothetical protein LOC547272                                                                                                      |
| BB756431 | Rpl32                          | ribosomal protein L32                                                                                                               |
| BE949064 | Nrxn2                          | neurexin II                                                                                                                         |
| AV337975 | 2810022L02Rik                  | RIKEN cDNA 2810022L02 gene                                                                                                          |
| BI714160 | Zfp287                         | zinc finger protein 287                                                                                                             |
| BB082386 | Trpm2                          | transient receptor potential cation channel, subfamily M, member 2                                                                  |
| BB306272 | Rora                           | RAR-related orphan receptor alpha                                                                                                   |
| BB306272 | Rora                           | RAR-related orphan receptor alpha                                                                                                   |
| BF730541 | ---                            | Transcribed locus                                                                                                                   |
| BB033554 | Lef1                           | Lymphoid enhancer binding factor 1                                                                                                  |
| BB447764 | Metap2 ///<br>A930035J23Rik    | methionine aminopeptidase 2 /// RIKEN cDNA A930035J23 gene                                                                          |
| BB223643 | ---                            | 9.5 days embryo parthenogenote cDNA, RIKEN full-length enriched library, clone:B130011E14 product:unknown EST, full insert sequence |
| AI585679 | LOC546041                      | similar to p47 protein isoform a                                                                                                    |
| BE980206 | Nav1                           | neuron navigator 1                                                                                                                  |
| AV255458 | Rfx4                           | regulatory factor X, 4 (influences HLA class II expression)                                                                         |
| BB053506 | Rbms3                          | RNA binding motif, single stranded interacting protein                                                                              |
| BM213788 | ---                            | Transcribed locus                                                                                                                   |
| AV316469 | 5830436I19Rik                  | RIKEN cDNA 5830436I19 gene                                                                                                          |
| AV216415 | Rps16                          | ribosomal protein S16                                                                                                               |
| BB120697 | Spr2a                          | Small proline-rich protein 2B                                                                                                       |
| AV276986 | Cblb                           | Casitas B-lineage lymphoma b                                                                                                        |
| BB494182 | BC035291                       | cDNA sequence BC035291                                                                                                              |
| BB135602 | LOC433377                      | similar to Interferon-activatable protein 203 (Ifi-203) (Interferon-inducible protein p203)                                         |
| BE981473 | 4930535B03Rik                  | RIKEN cDNA 4930535B03 gene                                                                                                          |
| BB471300 | 2610005L07Rik<br>/// LOC546041 | RIKEN cDNA 2610005L07 gene /// similar to p47 protein isoform a                                                                     |
| BB315668 | Mrpl9                          | mitochondrial ribosomal protein L9                                                                                                  |
| BB408240 | Diap1                          | Diaphanous homolog 1 (Drosophila)                                                                                                   |
| BB335101 | ---                            | ---                                                                                                                                 |
| AI159652 | 2600011C06Rik                  | RIKEN cDNA 2600011C06 gene                                                                                                          |
| AV273001 | Lbxcor1                        | ladybird homeobox 1 homolog (Drosophila) corepressor 1                                                                              |

|          |                            |                                                                                                             |
|----------|----------------------------|-------------------------------------------------------------------------------------------------------------|
| BG070544 | AI314760                   | expressed sequence AI314760                                                                                 |
| BB324894 | Pols                       | polymerase (DNA directed) sigma                                                                             |
| AW541326 | A430108E01Rik              | RIKEN cDNA A430108E01 gene                                                                                  |
| BM198106 | Rex2                       | reduced expression 2                                                                                        |
| BG073178 | Mid1                       | midline 1                                                                                                   |
| BB120894 | 9230108I15Rik              | RIKEN cDNA 9230108I15 gene                                                                                  |
| BB195788 | ---                        | Transcribed locus                                                                                           |
| AW123234 | LOC433810                  | similar to transmembrane protein SHREW1                                                                     |
| BF730196 | Bat2d                      | BAT2 domain containing 1                                                                                    |
| AW702170 | Pgm211                     | phosphoglucomutase 2-like 1                                                                                 |
| AW555368 | ---                        | T-complex responder, Smok(Tcr) gene, t6 allele strain t-haplotype t6                                        |
| BB482899 | Bnc2                       | basonuclin 2                                                                                                |
| BB408597 | Fbx111                     | F-box and leucine-rich repeat protein 11                                                                    |
| BQ174746 | 2900078E11Rik              | RIKEN cDNA 2900078E11 gene                                                                                  |
| BG061796 | Sfpq                       | splicing factor proline/glutamine rich (polypyrimidine tract binding protein associated)                    |
| AV320128 | Zfp462                     | zinc finger protein 462                                                                                     |
| BF021054 | Mll5                       | myeloid/lymphoid or mixed-lineage leukemia 5                                                                |
| BB747838 | 9530020G05Rik              | RIKEN cDNA 9530020G05 gene                                                                                  |
| BG971631 | Gm962                      | gene model 962, (NCBI)                                                                                      |
| BB471557 | Eif4enif1                  | Eukaryotic translation initiation factor 4E nuclear import factor 1                                         |
| AV114800 | Usp14                      | ubiquitin specific protease 14                                                                              |
| BB113440 | Nfat5                      | nuclear factor of activated T-cells 5                                                                       |
| BB167922 | Arpp21                     | RIKEN cDNA 0710001E13 gene                                                                                  |
| BB494544 | B230343H07Rik              | RIKEN cDNA B230343H07 gene                                                                                  |
| BB393078 | ---                        | Transcribed locus, strongly similar to XP_510099.1 PREDICTED: similar to neurexin 3-alpha [Pan troglodytes] |
| AV257990 | LOC433698 ///<br>LOC545611 | similar to hypothetical protein 4931430D02 /// similar to hypothetical protein 4931430D02                   |
| BM240066 | Synj1                      | Synaptojanin 1                                                                                              |
| BB117670 | ---                        | ---                                                                                                         |
| BQ174502 | AW048948                   | expressed sequence AW048948                                                                                 |
| BB098431 | C330012H03Rik              | RIKEN cDNA C330012H03 gene                                                                                  |
| AV214551 | 2410039E07Rik              | RIKEN cDNA 2410039E07 gene                                                                                  |
| BB099980 | ---                        | ---                                                                                                         |
| BB080140 | ---                        | ---                                                                                                         |
| BB277244 | Grik1                      | glutamate receptor, ionotropic, kainate 1                                                                   |
| BB821700 | C330046E03                 | hypothetical protein C330046E03                                                                             |
| AV273134 | BC032203                   | cDNA sequence BC032203                                                                                      |
| BM243939 | A630001G21Rik              | RIKEN cDNA A630001G21 gene                                                                                  |
| AV216984 | ---                        | Hypothetical gene supported by AK036306; AK088897; BC064022                                                 |
| BB309501 | Gcn111                     | GCN1 general control of amino-acid synthesis 1-like 1 (yeast)                                               |
| BB800596 | A830006F12Rik              | RIKEN cDNA A830006F12 gene                                                                                  |
| BB485539 | 2700085M18Rik              | RIKEN cDNA 2700085M18 gene                                                                                  |
| BB124976 | 9630002D21Rik              | RIKEN cDNA 9630002D21 gene                                                                                  |
| AV377077 | 9130221L21Rik              | RIKEN cDNA 9130221L21 gene                                                                                  |
| BB205199 | ---                        | ---                                                                                                         |
| BB061859 | BC052883                   | cDNA sequence BC052883                                                                                      |

|          |               |                                                                                                                                                 |
|----------|---------------|-------------------------------------------------------------------------------------------------------------------------------------------------|
| BB333095 | B830007D08Rik | RIKEN cDNA B830007D08 gene                                                                                                                      |
| BB099075 | LOC545039     | similar to hypothetical protein LOC73415                                                                                                        |
| BB430553 | A930041I02Rik | RIKEN cDNA A930041I02 gene                                                                                                                      |
| BB629079 | 5930418K15Rik | RIKEN cDNA 5930418K15 gene                                                                                                                      |
| BB356786 | Prdm16        | PR domain containing 16                                                                                                                         |
| BG064530 | Traf4         | Tnf receptor associated factor 4                                                                                                                |
| BB004419 | 4732460I02Rik | RIKEN cDNA 4732460I02 gene                                                                                                                      |
| BM935152 | LOC552912     | hypothetical LOC552912                                                                                                                          |
| BB229155 | Eif2c3        | eukaryotic translation initiation factor 2C, 3                                                                                                  |
| BB205493 | Eif2c3        | eukaryotic translation initiation factor 2C, 3                                                                                                  |
| BG074758 | Numa1         | RIKEN cDNA C030040A22 gene                                                                                                                      |
| BB829165 | ---           | Transcribed locus                                                                                                                               |
| BB480783 | D330050G23Rik | RIKEN cDNA D330050G23 gene                                                                                                                      |
| BB307791 | B230216G23Rik | RIKEN cDNA B230216G23 gene                                                                                                                      |
| BB097040 | ---           | CDNA clone IMAGE:30543871, partial cds                                                                                                          |
| BB474427 | Rfx3          | Regulatory factor X, 3 (influences HLA class II expression)                                                                                     |
| BB449095 | Rbm5          | RNA binding motif protein 5                                                                                                                     |
| BG075856 | 2310047I15Rik | RIKEN cDNA 9530037G02 gene                                                                                                                      |
| BM232203 | ---           | ---                                                                                                                                             |
| AW553065 | Per3          | period homolog 3 (Drosophila)                                                                                                                   |
| BB428868 | Dock4         | dedicator of cytokinesis 4                                                                                                                      |
| BM243297 | 9230115F04Rik | RIKEN cDNA 9230115F04 gene                                                                                                                      |
| BB016866 | ---           | Adult male testis cDNA, RIKEN full-length enriched library, clone:4930564M06 product:inferred: cadherin-11 {Mus musculus}, full insert sequence |
| BB066943 | 2810021G02Rik | RIKEN cDNA 2810021G02 gene                                                                                                                      |
| BB750043 | 9530006C21Rik | RIKEN cDNA 9530006C21 gene                                                                                                                      |
| BB521034 | ---           | ---                                                                                                                                             |
| BB554288 | Cxcl1         | chemokine (C-X-C motif) ligand 1                                                                                                                |
| BB315798 | ---           | ---                                                                                                                                             |
| BB458543 | 3110032G18Rik | RIKEN cDNA 3110032G18 gene                                                                                                                      |
| AV208461 | LOC541463     | testis-specific protein                                                                                                                         |
| BB028104 | 1200003C05Rik | RIKEN cDNA 1200003C05 gene                                                                                                                      |
| BB346825 | Trim65        | tripartite motif-containing 65                                                                                                                  |
| BB349344 | Usp25         | Ubiquitin specific protease 25                                                                                                                  |
| BB069506 | Vps18         | vacuolar protein sorting 18 (yeast)                                                                                                             |
| AA153229 | ---           | ---                                                                                                                                             |
| BB016374 | Blzf1         | basic leucine zipper nuclear factor 1                                                                                                           |
| BB273427 | Cpne5         | copine V                                                                                                                                        |
| AW555202 | ---           | ---                                                                                                                                             |
| AI426427 | Bicc1         | Bicaudal C homolog 1 (Drosophila)                                                                                                               |
| AI048080 | 4930482J15Rik | RIKEN cDNA 4930482J15 gene                                                                                                                      |
| AI503297 | Hars          | Histidyl-tRNA synthetase                                                                                                                        |
| AI326469 | ---           | ---                                                                                                                                             |
| AV337624 | ---           | ---                                                                                                                                             |
| AI593945 | 2610027H17Rik | RIKEN cDNA 2610027H17 gene                                                                                                                      |
| AV347067 | AI853688      | Expressed sequence AI853688                                                                                                                     |
| BG070986 | Oaz2          | Ornithine decarboxylase antizyme 2                                                                                                              |
| BB051562 | ---           | 12 days embryo male wolffian duct includes surrounding region                                                                                   |

|          |                                             |                                                                                                                              |
|----------|---------------------------------------------|------------------------------------------------------------------------------------------------------------------------------|
|          |                                             | cDNA, RIKEN full-length enriched library, clone:6720430M22 product:unknown EST, full insert sequence                         |
| BB455937 | E030004N02Rik                               | RIKEN cDNA E030004N02 gene                                                                                                   |
| BB017018 | ---                                         | ---                                                                                                                          |
| AW125345 | Itsn1                                       | Intersectin 1 (SH3 domain protein 1A)                                                                                        |
| AU017542 | 4933402C05Rik                               | RIKEN cDNA 4933402C05 gene                                                                                                   |
| AI849127 | Dpf3                                        | D4, zinc and double PHD fingers, family 3                                                                                    |
| BG067768 | D230016N13Rik                               | UDP-GalNAc:betaGlcNAc beta 1,3-galactosaminyltransferase, polypeptide 2                                                      |
| BB155332 | LOC433844                                   | similar to Anapc5 protein                                                                                                    |
| BB046659 | 6230415M23Rik                               | RIKEN cDNA 6230415M23 gene                                                                                                   |
| BG069857 | ---                                         | 13 days embryo heart cDNA, RIKEN full-length enriched library, clone:D330042P15 product:unclassifiable, full insert sequence |
| BG074150 | ---                                         | PREDICTED: Mus musculus similar to RIKEN cDNA 6030426L16 (LOC382713), mRNA                                                   |
| BB529784 | AI875199                                    | Expressed sequence AI875199                                                                                                  |
| BB231986 | Kcnj15                                      | potassium inwardly-rectifying channel, subfamily J, member 15                                                                |
| BB451832 | D130012P04Rik                               | RIKEN cDNA D130012P04 gene                                                                                                   |
| BB043897 | ---                                         | ---                                                                                                                          |
| BB389299 | Zfx1a                                       | Zinc finger homeobox 1a                                                                                                      |
| AW544264 | C330017I15Rik                               | RIKEN cDNA C330017I15 gene                                                                                                   |
| BB112393 | 9630050E16Rik                               | RIKEN cDNA 9630050E16 gene                                                                                                   |
| BB055155 | Meis1                                       | myeloid ecotropic viral integration site 1                                                                                   |
| BB472466 | 6720403M19Rik                               | RIKEN cDNA 6720403M19 gene                                                                                                   |
| BB211894 | Dock10                                      | Dedicator of cytokinesis 10                                                                                                  |
| BB260131 | 6430701C03Rik                               | RIKEN cDNA 6430701C03 gene                                                                                                   |
| BB158810 | ---                                         | ---                                                                                                                          |
| BG802688 | Ptpkr                                       | Protein tyrosine phosphatase, receptor type, K                                                                               |
| BG074352 | Spata5                                      | DNA segment, Chr 3, ERATO Doi 740, expressed                                                                                 |
| AA414992 | AA414992                                    | expressed sequence AA414992                                                                                                  |
| BB747705 | 4931433E08Rik                               | RIKEN cDNA 4931433E08 gene                                                                                                   |
| AI839625 | D14Ert171e                                  | DNA segment, Chr 14, ERATO Doi 171, expressed                                                                                |
| AW763628 | Ddx42                                       | DEAD (Asp-Glu-Ala-Asp) box polypeptide 42                                                                                    |
| AV010327 | Smyd1                                       | SET and MYND domain containing 1                                                                                             |
| BB376943 | AW822216                                    | Expressed sequence AW822216                                                                                                  |
| AV064339 | Sdpr                                        | serum deprivation response                                                                                                   |
| AV169685 | Rpl9                                        | Ribosomal protein L9                                                                                                         |
| BG143376 | Prkcz                                       | protein kinase C, zeta                                                                                                       |
| BG071002 | ---                                         | ---                                                                                                                          |
| BG083020 | ---                                         | ---                                                                                                                          |
| BG071029 | LOC544730 ///<br>LOC544731 ///<br>LOC544732 | similar to ALY /// similar to ALY /// similar to ALY                                                                         |
| BII01322 | Lrrc19                                      | leucine rich repeat containing 19                                                                                            |
| BB028141 | Parp11                                      | Poly (ADP-ribose) polymerase family, member 11                                                                               |
| BG063074 | Zfp81                                       | zinc finger protein 81                                                                                                       |
| AI414004 | ---                                         | Transcribed locus                                                                                                            |
| BM117570 | ---                                         | ---                                                                                                                          |
| BB121580 | ---                                         | Transcribed locus                                                                                                            |
| BE982367 | 2410089E03Rik                               | RIKEN cDNA 4732468D17 gene                                                                                                   |

|          |               |                                                                                                                           |
|----------|---------------|---------------------------------------------------------------------------------------------------------------------------|
| BB068784 | C330019G07Rik | RIKEN cDNA C330019G07 gene                                                                                                |
| AI606070 | ---           | Transcribed locus                                                                                                         |
| BG066195 | D2ErtD173e    | DNA segment, Chr 2, ERATO Doi 173, expressed                                                                              |
| BM117404 | ---           | Transcribed locus                                                                                                         |
| AW556834 | ---           | ---                                                                                                                       |
| AW492301 | Lrrtm3        | Leucine rich repeat transmembrane neuronal 3                                                                              |
| AU040151 | Ube2v1        | ubiquitin-conjugating enzyme E2 variant 1                                                                                 |
| AI462171 | AI462171      | expressed sequence AI462171                                                                                               |
| BE690666 | Ube3c         | Ubiquitin protein ligase E3C                                                                                              |
| BB380864 | Tcf12         | RIKEN cDNA E430034C17 gene                                                                                                |
| BB169269 | BC030499      | cDNA sequence BC030499                                                                                                    |
| AV268386 | ---           | Adult male testis cDNA, RIKEN full-length enriched library, clone:4930534N17 product:unclassifiable, full insert sequence |
| BG069109 | ---           | ---                                                                                                                       |
| BB089595 | Ppp1r12a      | Protein phosphatase 1, regulatory (inhibitor) subunit 12A                                                                 |
| BB228490 | AW539457      | expressed sequence AW539457                                                                                               |
| BB534392 | Rai14         | Retinoic acid induced 14                                                                                                  |
| BB028677 | 3-Sep         | septin 3                                                                                                                  |
| BE985246 | Zfp59         | zinc finger protein 59                                                                                                    |
| BG073304 | Pcp4l1        | Purkinje cell protein 4-like 1                                                                                            |
| BG076234 | A330015D16Rik | RIKEN cDNA A330015D16 gene                                                                                                |
| BG067367 | C86090        | expressed sequence C86090                                                                                                 |
| BG068807 | ---           | Transcribed locus                                                                                                         |
| BG065773 | C76872        | expressed sequence C76872                                                                                                 |
| BG065821 | D12ErtD125e   | DNA segment, Chr 12, ERATO Doi 125, expressed                                                                             |
| C77893   | A430105I05Rik | RIKEN cDNA A430105I05 gene                                                                                                |
| BG069080 | ---           | ---                                                                                                                       |
| BG066175 | ---           | ---                                                                                                                       |
| BG068236 | Cbfa2t1h      | CBFA2T1 identified gene homolog (human)                                                                                   |
| BG066727 | ---           | ---                                                                                                                       |
| BG067063 | Zfp276        | zinc finger protein (C2H2 type) 276                                                                                       |
| BG073921 | ---           | ---                                                                                                                       |
| BE993069 | AI875142      | Expressed sequence AI875142                                                                                               |
| BG067686 | 5830435C13Rik | RIKEN cDNA 5830435C13 gene                                                                                                |
| BG066900 | C80893        | expressed sequence C80893                                                                                                 |
| BI076698 | ---           | ---                                                                                                                       |
| BB041366 | Akr1b3        | Aldo-keto reductase family 1, member B3 (aldose reductase)                                                                |
| BG066928 | C81001        | expressed sequence C81001                                                                                                 |
| BG076014 | ---           | ---                                                                                                                       |
| BB029606 | Tes3          | Testis derived transcript 3                                                                                               |
| BF148780 | ---           | ---                                                                                                                       |
| BB450122 | Dtnb          | dystrobrevin, beta                                                                                                        |
| BB250407 | Tmed5         | transmembrane emp24 protein transport domain containing 5                                                                 |
| BM942607 | Ppp4c         | Protein phosphatase 4, catalytic subunit                                                                                  |
| BE650311 | ---           | Transcribed locus                                                                                                         |
| BE987947 | ---           | Clone NIA:K0956B04 unknown mRNA                                                                                           |
| BB503979 | 4930573O21Rik | RIKEN cDNA 4930573O21 gene                                                                                                |
| BG068986 | ---           | ---                                                                                                                       |
| BB012661 | ---           | Adult male testis cDNA, RIKEN full-length enriched library,                                                               |



|          |                            |                                                                       |
|----------|----------------------------|-----------------------------------------------------------------------|
|          |                            | clone:4930452E19 product:unclassifiable, full insert sequence         |
| BF464298 | Elovl6                     | ELOVL family member 6, elongation of long chain fatty acids (yeast)   |
| BB750374 | Stag1                      | Stromal antigen 1                                                     |
| AI481875 | ---                        | ---                                                                   |
| BB709387 | ---                        | Similar to erythrocyte membrane protein 3                             |
| BB533367 | AL023008                   | expressed sequence AL023008                                           |
| BG076325 | ---                        | Transcribed locus                                                     |
| BG069626 | Nrf1                       | Nuclear respiratory factor 1                                          |
| BG065840 | LOC385211 ///<br>LOC433783 | similar to RIKEN cDNA 1700029I01 /// similar to RIKEN cDNA 1700029I01 |
| BG073432 | ---                        | ---                                                                   |
| BG072805 | 4930522L14Rik              | RIKEN cDNA 4930522L14 gene                                            |
| BG071600 | ---                        | Transcribed locus                                                     |
| BB124954 | Lztf1                      | Leucine zipper transcription factor-like 1                            |
| BG075609 | Piwil2                     | Piwi like homolog 2 (Drosophila)                                      |
| BB241135 | ---                        | PREDICTED: Mus musculus similar to Cdv3 protein (LOC433790), mRNA     |
| BB357080 | Rgs20                      | regulator of G-protein signaling 20                                   |
| AW556352 | ErbB4                      | V-erb-a erythroblastic leukemia viral oncogene homolog 4 (avian)      |
| BB410501 | Slc18a1                    | solute carrier family 18 (vesicular monoamine), member 1              |
| BG066278 | C78692                     | expressed sequence C78692                                             |
| BB082509 | 9330175H22Rik              | RIKEN cDNA 9330175H22 gene                                            |
| BG068989 | ---                        | ---                                                                   |
| BB088181 | Gprk5                      | G protein-coupled receptor kinase 5                                   |
| BG075370 | ---                        | ---                                                                   |
| AV236736 | Akr1e1                     | aldo-keto reductase family 1, member E1                               |
| BB496295 | ---                        | ---                                                                   |
| BB538708 | Psm14                      | Proteasome (prosome, macropain) 26S subunit, non-ATPase, 14           |
| BG069648 | ---                        | ---                                                                   |
| BB497767 | Pax8                       | paired box gene 8                                                     |
| BB263909 | Dlgh2                      | Discs, large homolog 2 (Drosophila)                                   |
| BI076711 | ---                        | ---                                                                   |
| AW554535 | Chd7                       | Chromodomain helicase DNA binding protein 7                           |
| BB249985 | A730037C10Rik              | RIKEN cDNA A730037C10 gene                                            |
| BG066346 | ---                        | ---                                                                   |
| BB156930 | A130033P14                 | hypothetical protein A130033P14                                       |
| BB660139 | Zswim6                     | Zinc finger, SWIM domain containing 6                                 |
| BI180797 | Gna13                      | Guanine nucleotide binding protein, alpha 13                          |
| BB197238 | A130094D17Rik              | RIKEN cDNA A130094D17 gene                                            |
| C77540   | ---                        | ---                                                                   |
| AU022245 | AU022245                   | expressed sequence AU022245                                           |
| BG074662 | ---                        | ---                                                                   |
| BG072329 | 1700025D03Rik              | RIKEN cDNA 1700025D03 gene                                            |
| BB276575 | ---                        | ---                                                                   |
| BG066222 | C78505                     | expressed sequence C78505                                             |
| BG074954 | Nr2c2                      | Nuclear receptor subfamily 2, group C, member 2                       |
| AW553679 | Ccp1                       | Cell cycle progression 1                                              |
| C77164   | 1700008I05Rik              | RIKEN cDNA 1700008I05 gene                                            |

|          |               |                                                                       |
|----------|---------------|-----------------------------------------------------------------------|
| BB386653 | ErbB4         | V-erb-a erythroblastic leukemia viral oncogene homolog 4 (avian)      |
| BG068123 | ---           | ---                                                                   |
| BG068681 | ---           | ---                                                                   |
| AU042851 | ---           | ---                                                                   |
| AW543447 | ---           | ---                                                                   |
| C79752   | ---           | ---                                                                   |
| AU022045 | ---           | ---                                                                   |
| AW557641 | ---           | ---                                                                   |
| AU016662 | ---           | Transcribed locus                                                     |
| AI853438 | Recq1         | RecQ protein-like                                                     |
| BM248411 | Zfp289        | RIKEN cDNA 5930420B01 gene                                            |
| BE980854 | H2afy3        | H2A histone family, member Y3                                         |
| BF321332 | ---           | ---                                                                   |
| BG070611 | ---           | ---                                                                   |
| BE948370 | ---           | Transcribed locus                                                     |
| AI506532 | ---           | ---                                                                   |
| AI505360 | AU040576      | Transmembrane protein 16A                                             |
| AW121856 | ---           | ---                                                                   |
| AI843353 | ---           | Transcribed locus                                                     |
| AI448156 | ---           | ---                                                                   |
| BB712583 | ---           | ---                                                                   |
| BI499978 | ---           | Transcribed locus                                                     |
| AI842382 | Helz          | Helicase with zinc finger domain                                      |
| BI793813 | 2900045N06Rik | RIKEN cDNA 2900045N06 gene                                            |
| AV045102 | ---           | ---                                                                   |
| BB470306 | ---           | ---                                                                   |
| AV160090 | Snap25        | Synaptosomal-associated protein 25                                    |
| AV085634 | Tcn2          | Transcobalamin 2                                                      |
| AV143687 | Tcn2          | Transcobalamin 2                                                      |
| AV127319 | Hist2h2be     | histone 2, H2be                                                       |
| AV208528 | ---           | Transcribed locus                                                     |
| BB255841 | ---           | ---                                                                   |
| BB273287 | ---           | ---                                                                   |
| AK018466 | 8430436O14Rik | RIKEN cDNA 8430436O14 gene                                            |
| BM217754 | 2900054D09Rik | RIKEN cDNA 2900054D09 gene                                            |
| AK018294 | 6430701C03Rik | RIKEN cDNA 6430701C03 gene                                            |
| BB859781 | Rpl22         | ribosomal protein L22                                                 |
| AK018550 | 9030612M13Rik | RIKEN cDNA 9030612M13 gene                                            |
| AK007420 | 4933439C20Rik | RIKEN cDNA 4933439C20 gene                                            |
| AK007420 | 4933439C20Rik | RIKEN cDNA 4933439C20 gene                                            |
| AK017753 | 5730507C01Rik | RIKEN cDNA 5730507C01 gene                                            |
| BB626695 | Atbf1         | AT motif binding factor 1                                             |
| AK014551 | 4632404N19Rik | RIKEN cDNA 4632404N19 gene                                            |
| AK016255 | Speer7-ps1    | spermatogenesis associated glutamate (E)-rich protein 7, pseudogene 1 |
| BE945468 | 9530057J20Rik | RIKEN cDNA 9530057J20 gene                                            |
| AI466222 | Zzef1         | zinc finger, ZZ-type with EF hand domain 1                            |
| AK020949 | A930041D05Rik | RIKEN cDNA A930041D05 gene                                            |
| AK005661 | 2610312B22Rik | RIKEN cDNA 2610312B22 gene                                            |

|          |                                          |                                                                                                              |
|----------|------------------------------------------|--------------------------------------------------------------------------------------------------------------|
| AV278800 | 4933403O03Rik                            | RIKEN cDNA 4933403O03 gene                                                                                   |
| AI036213 | 1700026J12Rik                            | RIKEN cDNA 1700026J12 gene                                                                                   |
| AK018624 | 9130015A21Rik                            | RIKEN cDNA 9130015A21 gene                                                                                   |
| AK019946 | 5430417C01Rik                            | RIKEN cDNA 5430417C01 gene                                                                                   |
| AV250295 | 4833422B07Rik                            | RIKEN cDNA 4833422B07 gene                                                                                   |
| AK017499 | 5730405O12Rik                            | RIKEN cDNA 5730405O12 gene                                                                                   |
| AK014604 | 4632432E15Rik                            | RIKEN cDNA 4632432E15 gene                                                                                   |
| AK014195 | 3110048L19Rik                            | RIKEN cDNA 3110048L19 gene                                                                                   |
| AK015517 | 4930467D19Rik                            | RIKEN cDNA 4930467D19 gene                                                                                   |
| AK016790 | ---                                      | ---                                                                                                          |
| AK018405 | Rabepk                                   | Rab9 effector protein with kelch motifs                                                                      |
| AK017129 | 4933439N06Rik                            | RIKEN cDNA 4933439N06 gene                                                                                   |
| AK020405 | 9430006E15Rik                            | RIKEN cDNA 9430006E15 gene                                                                                   |
| AK019583 | 4930425F17Rik                            | RIKEN cDNA 4930425F17 gene                                                                                   |
| BB282890 | BC034054                                 | cDNA sequence BC034054                                                                                       |
| BB314680 | Tatdn2                                   | TatD DNase domain containing 2                                                                               |
| AV024996 | AI790205                                 | expressed sequence AI790205                                                                                  |
| AW107953 | Phr1                                     | pam, highwire, rpm 1                                                                                         |
| BM246326 | AI553587                                 | expressed sequence AI553587                                                                                  |
| BE225694 | Cri2                                     | CREBBP/EP300 inhibitory protein 2                                                                            |
| BG066901 | ---                                      | ---                                                                                                          |
| BI076807 | a                                        | Nonagouti                                                                                                    |
| AV350759 | Kcnj11                                   | potassium inwardly rectifying channel, subfamily J, member 11                                                |
| AW121714 | 1700010H15Rik                            | RIKEN cDNA 1700010H15 gene                                                                                   |
| BB769628 | Csf2rb1                                  | Colony stimulating factor 2 receptor, beta 1, low-affinity (granulocyte-macrophage)                          |
| BQ176181 | ---                                      | Transcribed locus                                                                                            |
| BM228829 | C87414 ///<br>LOC545772 ///<br>LOC545780 | expressed sequence C87414 /// similar to C87414 protein /// similar to C87414 protein                        |
| BB053082 | Ssh1                                     | slingshot homolog 1 (Drosophila)                                                                             |
| BB732439 | Zfp536                                   | zinc finger protein 536                                                                                      |
| BB198406 | BB165335                                 | expressed sequence BB165335                                                                                  |
| BB763701 | ---                                      | ---                                                                                                          |
| AA408787 | Trim28                                   | tripartite motif protein 28                                                                                  |
| BB417442 | Clec1a                                   | C-type lectin domain family 1, member a                                                                      |
| BB475194 | Adamts5                                  | a disintegrin-like and metalloprotease (reprolysin type) with thrombospondin type 1 motif, 5 (aggrecanase-2) |
| BB703378 | ---                                      | ---                                                                                                          |
| BB284583 | Itga4                                    | integrin alpha 4                                                                                             |
| BB458578 | Prp19                                    | PRP19/PSO4 homolog ( <i>S. cerevisiae</i> )                                                                  |
| BB728372 | ---                                      | ---                                                                                                          |
| BM116906 | LOC552902                                | hypothetical LOC552902                                                                                       |
| AV208162 | 4933406F09Rik                            | RIKEN cDNA 4933406F09 gene                                                                                   |
| BB556275 | Brp16                                    | brain protein 16                                                                                             |
| BB308463 | B230303O12Rik                            | RIKEN cDNA B230303O12 gene                                                                                   |
| BE630303 | D230010M03Rik                            | RIKEN cDNA D230010M03 gene                                                                                   |
| AW123678 | ---                                      | ---                                                                                                          |
| BM237837 | Cobl1                                    | Cobl-like 1                                                                                                  |

|          |                                             |                                                                                                                               |
|----------|---------------------------------------------|-------------------------------------------------------------------------------------------------------------------------------|
| BM198753 | Gm397 ///<br>XM_486399 ///<br>LOC545913     | gene model 397, (NCBI) /// Mus musculus sequence XM_486399<br>/// similar to Gm397 protein                                    |
| BG070129 | D2Ertd624e                                  | DNA segment, Chr 2, ERATO Doi 624, expressed                                                                                  |
| BB485668 | Nfx11                                       | nuclear transcription factor, X-box binding-like 1                                                                            |
| BI963564 | ---                                         | ---                                                                                                                           |
| BM899576 | Odz2                                        | Odd Oz/ten-m homolog 2 (Drosophila)                                                                                           |
| BF714580 | Zbtb4                                       | zinc finger and BTB domain containing 4                                                                                       |
| L26640   | LOC433975 ///<br>LOC545729 ///<br>LOC545730 | hypothetical gene supported by AK077204 /// hypothetical protein<br>LOC545729 /// hypothetical protein LOC545730              |
| BB136803 | Trps1                                       | trichorhinophalangeal syndrome I (human)                                                                                      |
| BB205419 | Hipk1                                       | Homeodomain interacting protein kinase 1                                                                                      |
| BB066943 | 2810021G02Rik                               | RIKEN cDNA 2810021G02 gene                                                                                                    |
| AU018617 | D11Ertd717e                                 | DNA segment, Chr 11, ERATO Doi 717, expressed                                                                                 |
| AV236222 | 2900091E11Rik                               | RIKEN cDNA 2900091E11 gene                                                                                                    |
| AI506888 | ---                                         | ---                                                                                                                           |
| AV238225 | Lmna                                        | lamin A                                                                                                                       |
| AI643819 | ---                                         | Transcribed locus                                                                                                             |
| BB767243 | ---                                         | Transcribed locus                                                                                                             |
| BB193921 | ---                                         | ---                                                                                                                           |
| AV378786 | Cln3                                        | ceroid lipofuscinosis, neuronal 3, juvenile (Batten, Spielmeier-<br>Vogt disease)                                             |
| AW122190 | 2900019G14Rik                               | RIKEN cDNA 2900019G14 gene                                                                                                    |
| BB705267 | Og9x                                        | OG9 homeobox gene                                                                                                             |
| BM121947 | Cd80                                        | CD80 antigen                                                                                                                  |
| AI447935 | ---                                         | ---                                                                                                                           |
| BG068747 | 1200016B10Rik                               | RIKEN cDNA 1200016B10 gene                                                                                                    |
| BG068591 | ---                                         | ---                                                                                                                           |
| BB046190 | Odz4                                        | Odd Oz/ten-m homolog 4 (Drosophila)                                                                                           |
| BI076708 | ---                                         | ---                                                                                                                           |
| BB322169 | Ptcd2                                       | Pentatricopeptide repeat domain 2                                                                                             |
| BB524001 | Hapln1                                      | Hyaluronan and proteoglycan link protein 1                                                                                    |
| BB466171 | D230007K08Rik                               | RIKEN cDNA D230007K08 gene                                                                                                    |
| BB548850 | E230012J19Rik                               | RIKEN cDNA E230012J19 gene                                                                                                    |
| BB183984 | ---                                         | 3 days neonate thymus cDNA, RIKEN full-length enriched library,<br>clone:A630051O22 product:unknown EST, full insert sequence |
| BG068932 | ---                                         | ---                                                                                                                           |
| AW553423 | ---                                         | ---                                                                                                                           |
| BB713391 | ---                                         | Mus musculus, Similar to RIKEN cDNA B430319H21 gene, clone<br>IMAGE:3991101, mRNA                                             |
| AI647966 | 5830446M03Rik                               | RIKEN cDNA B130021K23 gene                                                                                                    |
| AI462674 | Cadps                                       | Ca <sup>2+</sup> dependent activator protein for secretion                                                                    |
| BB804671 | Usp36                                       | ubiquitin specific protease 36                                                                                                |
| BB192266 | 2900073H19Rik                               | RIKEN cDNA 2900073H19 gene                                                                                                    |
| C79035   | ---                                         | ---                                                                                                                           |
| AW491514 | 1810056O20Rik                               | RIKEN cDNA 1810056O20 gene                                                                                                    |
| BM247957 | ---                                         | ---                                                                                                                           |
| AI413530 | Clec2e                                      | C-type lectin domain family 2, member e                                                                                       |
| BE945748 | ---                                         | ---                                                                                                                           |

|          |               |                                                                                                                                          |
|----------|---------------|------------------------------------------------------------------------------------------------------------------------------------------|
| BB023775 | App           | Amyloid beta (A4) precursor protein                                                                                                      |
| BB345991 | ---           | 10 days neonate cerebellum cDNA, RIKEN full-length enriched library, clone:B930059J09 product:hypothetical protein, full insert sequence |
| AI585995 | ---           | ---                                                                                                                                      |
| AU022229 | AW121567      | Expressed sequence AW121567                                                                                                              |
| AI118114 | ---           | Transcribed locus                                                                                                                        |
| AI585789 | ---           | Transcribed locus                                                                                                                        |
| AW494074 | ---           | Transcribed locus                                                                                                                        |
| BB550311 | Polr2a        | Polymerase (RNA) II (DNA directed) polypeptide A                                                                                         |
| BG069087 | Gpr149        | G protein-coupled receptor 149                                                                                                           |
| BG064130 | Ltbp1         | Latent transforming growth factor beta binding protein 1                                                                                 |
| BM246833 | Rbm27         | RNA binding motif protein 27                                                                                                             |
| BM939280 | Gm83          | Gene model 83, (NCBI)                                                                                                                    |
| BG066304 | D12ErtD208e   | DNA segment, Chr 12, ERATO Doi 208, expressed                                                                                            |
| BB164127 | Hivep3        | human immunodeficiency virus type I enhancer binding protein 3                                                                           |
| BG066746 | ---           | ---                                                                                                                                      |
| BG070655 | ---           | ---                                                                                                                                      |
| BG066161 | D3ErtD162e    | DNA segment, Chr 3, ERATO Doi 162, expressed                                                                                             |
| AW544672 | ---           | ---                                                                                                                                      |
| BB364131 | Ghr           | Growth hormone receptor                                                                                                                  |
| C77586   | D11ErtD49e    | DNA segment, Chr 11, ERATO Doi 49, expressed                                                                                             |
| BB216476 | Pfas          | Phosphoribosylformylglycinamide synthase (FGAR amidotransferase)                                                                         |
| BB456871 | D130016B08Rik | RIKEN cDNA D130016B08 gene                                                                                                               |
| BG798107 | D030051N19Rik | RIKEN cDNA D030051N19 gene                                                                                                               |
| BB735036 | ---           | Transcribed locus                                                                                                                        |
| BG067289 | ---           | ---                                                                                                                                      |
| BG075241 | Zfp521        | Zinc finger protein 521                                                                                                                  |
| BG066734 | C80165        | expressed sequence C80165                                                                                                                |
| AW537756 | A230048G03Rik | RIKEN cDNA A230048G03 gene                                                                                                               |
| BB518380 | 2410003P15Rik | RIKEN cDNA 2410003P15 gene                                                                                                               |
| AV318787 | Sca2          | Spinocerebellar ataxia 2 homolog (human)                                                                                                 |
| BG074624 | ---           | ---                                                                                                                                      |
| AU040911 | ---           | ---                                                                                                                                      |
| C87580   | C87580        | expressed sequence C87580                                                                                                                |
| AW495413 | ---           | ---                                                                                                                                      |
| AI536269 | Pacs1         | RIKEN cDNA D430030G11 gene                                                                                                               |
| BB055869 | Zfp162        | Zinc finger protein 162                                                                                                                  |
| BE992875 | ---           | ---                                                                                                                                      |
| BB466780 | Trim2         | tripartite motif protein 2                                                                                                               |
| AV221085 | Fbx110        | F-box and leucine-rich repeat protein 10                                                                                                 |
| BF472132 | 1810057P16Rik | RIKEN cDNA 1810057P16 gene                                                                                                               |
| BB007036 | Txndc5        | Thioredoxin domain containing 5                                                                                                          |
| AV261043 | Sod1          | superoxide dismutase 1, soluble                                                                                                          |
| AV271189 | ---           | ---                                                                                                                                      |
| BF465089 | Nlgn2         | neuroligin 2                                                                                                                             |
| BB473929 | ---           | ---                                                                                                                                      |
| BF455409 | ---           | Transcribed locus                                                                                                                        |

|          |               |                            |
|----------|---------------|----------------------------|
| BG070566 | ---           | ---                        |
| BG070910 | ---           | ---                        |
| C76835   | 2610028L16Rik | RIKEN cDNA 2610028L16 gene |
| AK017182 | 5033421C21Rik | RIKEN cDNA 5033421C21 gene |
| AK021064 | Cdh10         | cadherin 10                |
| BB148972 | 9930116O05Rik | RIKEN cDNA 9930116O05 gene |
| BI076807 | a             | Nonagouti                  |
