# Supplementary material for: Exosome-mediated transfer of mRNAs and microRNAs is a novel mechanism of genetic exchange between cells
Source: Springer Nature journal article supplement (doi:10.1038/ncb1596), 2007-05-07
Supplement: 41556_2007_BFncb1596_MOESM18_ESM.pdf [file 41556_2007_BFncb1596_MOESM18_ESM.pdf]

**Supplementary Information, Table S3.****All genes present in exosomes but absent in the MC/9 cells.**

All transcripts (270) present in mast cells derived exosomes but absent in their donor cells MC/9. The transcripts were identified by Affymetrix mouse DNA microarray and analysed by the Affymetrix program GCOS followed by the spotfire software.

| Entrez gene ID | Gene Symbol   | Gene Title                                                                                                               |
|----------------|---------------|--------------------------------------------------------------------------------------------------------------------------|
| NM_029550      | Keg1          | kidney expressed gene 1                                                                                                  |
| BG069413       | Klf4          | Kruppel-like factor 4 (gut)                                                                                              |
| NM_027940      | 1700001F09Rik | RIKEN cDNA 1700001F09 gene                                                                                               |
| NM_021560      | Bhlhb5        | basic helix-loop-helix domain containing, class B5                                                                       |
| NM_008305      | ---           | ---                                                                                                                      |
| NM_011774      | Slc30a4       | solute carrier family 30 (zinc transporter), member 4                                                                    |
| NM_008176      | Cxcl1         | chemokine (C-X-C motif) ligand 1                                                                                         |
| C79214         | D2Ertd239e    | DNA segment, Chr 2, ERATO Doi 239, expressed                                                                             |
| C77692         | D2Ertd63e     | DNA segment, Chr 2, ERATO Doi 63, expressed                                                                              |
| BC003705       | Sftpd         | surfactant associated protein D                                                                                          |
| NM_030676      | Nr5a2         | nuclear receptor subfamily 5, group A, member 2                                                                          |
| NM_031188      | Mup1 /// Mup2 | major urinary protein 1 /// major urinary protein 2                                                                      |
| NM_029667      | 2310069N01Rik | RIKEN cDNA 2310069N01 gene                                                                                               |
| NM_019985      | Clec1b        | C-type lectin domain family 1, member b                                                                                  |
| NM_028605      | 2410116I05Rik | RIKEN cDNA 2410116I05 gene                                                                                               |
| NM_009647      | Ak3l1         | adenylate kinase 3 alpha-like 1                                                                                          |
| NM_008500      | Lhx6          | LIM homeobox protein 6                                                                                                   |
| NM_008836      | Phxr5         | per-hexamer repeat gene 5                                                                                                |
| NM_008239      | Foxq1         | forkhead box Q1                                                                                                          |
| NM_008587      | Mertk         | c-mer proto-oncogene tyrosine kinase                                                                                     |
| NM_009126      | Serpinb3b     | serine (or cysteine) proteinase inhibitor, clade B (ovalbumin), member 3B                                                |
| BC020531       | Spon1         | spondin 1, (f-spondin) extracellular matrix protein                                                                      |
| AF306667       | Tbx20         | T-box 20                                                                                                                 |
| AF307746       | Tnk1          | tyrosine kinase, non-receptor, 1                                                                                         |
| BC016247       | 6430548M08Rik | RIKEN cDNA 6430548M08 gene                                                                                               |
| AF290196       | Zfp352        | zinc finger protein 352                                                                                                  |
| U57821         | Mdf1          | MyoD family inhibitor                                                                                                    |
| U15647         | LOC277923     | reverse transcriptase                                                                                                    |
| M55512         | Wt1           | Wilms tumor homolog                                                                                                      |
| AF292033       | Twsg1         | twisted gastrulation homolog 1 (Drosophila)                                                                              |
| BM116592       | Neurod1       | neurogenic differentiation 1                                                                                             |
| BQ176723       | Nrp2          | neuropilin 2                                                                                                             |
| BG068672       | ---           | Transcribed locus                                                                                                        |
| BB316578       | LOC434002     | hypothetical gene supported by AK018238; AK046289                                                                        |
| AA413531       |               | eukaryotic translation initiation factor 1A /// similar to Eukaryotic translation initiation factor 1A (eIF-1A) (eIF-4C) |
| AI509029       | Six3          | sine oculis-related homeobox 3 homolog (Drosophila)                                                                      |
| AI615965       | Zfp125        | zinc finger protein 125                                                                                                  |
| M18237         | ---           | Immunoglobulin rearranged kappa-chain (OK1) mRNA V region                                                                |
| AF373288       | Adam34        | a disintegrin and metalloprotease domain 34                                                                              |
| AK011748       |               | RIKEN cDNA 1700001E04 gene /// RIKEN cDNA 4930555G01                                                                     |

|           |                           | gene                                                                                                                                                                                                                                          |
|-----------|---------------------------|-----------------------------------------------------------------------------------------------------------------------------------------------------------------------------------------------------------------------------------------------|
| AK014104  | Wasl                      | Wiskott-Aldrich syndrome-like (human)                                                                                                                                                                                                         |
| BB364520  | Tcf4                      | transcription factor 4                                                                                                                                                                                                                        |
| BG072739  | Sox11                     | SRY-box containing gene 11                                                                                                                                                                                                                    |
| AV060902  | Ela3b                     | elastase 3B, pancreatic                                                                                                                                                                                                                       |
| AV216768  | Phgdh ///<br>LOC546010    | 3-phosphoglycerate dehydrogenase /// similar to 3-phosphoglycerate dehydrogenase                                                                                                                                                              |
| C77655    | ---                       | PREDICTED: Mus musculus similar to protease (LOC434722), mRNA                                                                                                                                                                                 |
| C77609    | C77609                    | expressed sequence C77609                                                                                                                                                                                                                     |
| BG063240  |                           | similar to protease /// similar to protease                                                                                                                                                                                                   |
| BG066461  | C79246                    | expressed sequence C79246                                                                                                                                                                                                                     |
| BG066044  | C77815                    | expressed sequence C77815                                                                                                                                                                                                                     |
| BG078932  | C76336                    | expressed sequence C76336                                                                                                                                                                                                                     |
| NM_009690 | Cd5l                      | CD5 antigen-like                                                                                                                                                                                                                              |
| NM_009220 |                           | spermiogenesis specific transcript on the Y 1 /// similar to Y-linked testis-specific protein |
| BC010820  | Atoh1                     | atonal homolog 1 (Drosophila)                                                                                                                                                                                                                 |
| NM_028570 | 1700091H14Rik             | RIKEN cDNA 1700091H14 gene                                                                                                                                                                                                                    |
| NM_007496 | Atbf1                     | AT motif binding factor 1                                                                                                                                                                                                                     |
| AW259474  | Ighmbp2                   | immunoglobulin mu binding protein 2                                                                                                                                                                                                           |
| NM_009493 | V2r4 /// V2r5             | vomer nasal 2, receptor, 4 /// vomer nasal 2, receptor, 5                                                                                                                                                                                     |
| BC024416  | ---                       | MRNA similar to RIKEN cDNA 9030624G23 gene (cDNA clone MGC:36379 IMAGE:4988668), complete cds                                                                                                                                                 |
| BB628935  | Ank3 ///<br>2900054D09Rik | ankyrin 3, epithelial /// RIKEN cDNA 2900054D09 gene                                                                                                                                                                                          |
| AV306884  | Plce1                     | phospholipase C, epsilon 1                                                                                                                                                                                                                    |
| M73818    | ---                       | ---                                                                                                                                                                                                                                           |
| AF047725  | Cyp2c38                   | cytochrome P450, family 2, subfamily c, polypeptide 38                                                                                                                                                                                        |
| BC021831  | ---                       | Mus musculus, clone IMAGE:3983821, mRNA, partial cds                                                                                                                                                                                          |
| BM195235  |                           | similar to hypothetical protein LOC67055 /// similar to hypothetical protein LOC67055                                                                                                                                                         |
| BG066238  | C78549                    | expressed sequence C78549                                                                                                                                                                                                                     |
| BG066533  | ---                       | ---                                                                                                                                                                                                                                           |
| C78891    | C78891                    | expressed sequence C78891                                                                                                                                                                                                                     |
| BG066263  | C78651                    | expressed sequence C78651                                                                                                                                                                                                                     |
| BG065684  | C76472                    | expressed sequence C76472                                                                                                                                                                                                                     |
| NM_010654 | Klrd1                     | killer cell lectin-like receptor, subfamily D, member 1                                                                                                                                                                                       |
| AF277898  | Egfr                      | epidermal growth factor receptor                                                                                                                                                                                                              |
| BG069991  | ---                       | ---                                                                                                                                                                                                                                           |
| BG083989  | ---                       | ---                                                                                                                                                                                                                                           |
| AK006257  | 1700023A16Rik             | RIKEN cDNA 1700023A16 gene                                                                                                                                                                                                                    |
| BB462518  | Syt11                     | synaptotagmin XI                                                                                                                                                                                                                              |
| AK006975  | Speer4b                   | spermatogenesis associated glutamate (E)-rich protein 4b                                                                                                                                                                                      |
| AK006975  | Speer4b                   | spermatogenesis associated glutamate (E)-rich protein 4b                                                                                                                                                                                      |
| AK008821  | Cldn22                    | claudin 22                                                                                                                                                                                                                                    |
| AK016695  | 4933406J08Rik             | RIKEN cDNA 4933406J08 gene                                                                                                                                                                                                                    |
| AK017111  | 4933438K21Rik             | RIKEN cDNA 4933438K21 gene                                                                                                                                                                                                                    |

|          |                                       |                                                                                              |
|----------|---------------------------------------|----------------------------------------------------------------------------------------------|
| AK019407 | Fbxo44                                | : F-box protein 44                                                                           |
| AV278455 | 4933402C05Rik                         | RIKEN cDNA 4933402C05 gene                                                                   |
| BB019121 | Cml3                                  | camello-like 3                                                                               |
| BG807740 | 1500019C06Rik                         | RIKEN cDNA 1500019C06 gene                                                                   |
| AK012902 | 5730446D14Rik                         | RIKEN cDNA 5730446D14 gene                                                                   |
| BI319712 | Adamts9                               | a disintegrin-like and metalloprotease (reprolysin type) with thrombospondin type 1 motif, 9 |
| AK016652 | 4933404K08Rik                         | RIKEN cDNA 4933404K08 gene                                                                   |
| BF227338 | ---                                   | ---                                                                                          |
| AK016081 | 4930549O18Rik                         | RIKEN cDNA 4930549O18 gene                                                                   |
| AK012982 | 2810404F17Rik                         | RIKEN cDNA 2810404F17 gene                                                                   |
| AK005492 | Psg21                                 | pregnancy-specific glycoprotein 21                                                           |
| AK014779 | 4833427F10Rik                         | RIKEN cDNA 4833427F10 gene                                                                   |
| AK020418 | 9430014N10Rik                         | RIKEN cDNA 9430014N10 gene                                                                   |
| AK016812 | 4933414I06Rik                         | RIKEN cDNA 4933414I06 gene                                                                   |
| AK006176 | 1700020M10Rik                         | RIKEN cDNA 1700020M10 gene                                                                   |
| AK018881 | 1700066C05Rik                         | RIKEN cDNA 1700066C05 gene                                                                   |
| BE381593 | 4933411E06Rik                         | RIKEN cDNA 4933411E06 gene                                                                   |
| AK011583 | Itgav                                 | integrin alpha V                                                                             |
| AK017425 | 5530400K19Rik                         | RIKEN cDNA 5530400K19 gene                                                                   |
| AK015390 | 4930445G23Rik                         | RIKEN cDNA 4930445G23 gene                                                                   |
| AK018498 | 9030409K20Rik                         | RIKEN cDNA 9030409K20 gene                                                                   |
| AK019801 | 4933406F09Rik                         | RIKEN cDNA 4933406F09 gene                                                                   |
| AK019930 | 5330433J24Rik                         | RIKEN cDNA 5330433J24 gene                                                                   |
| AK016790 | 4933412F11Rik<br>///<br>4930529H12Rik | RIKEN cDNA 4933412F11 gene /// RIKEN cDNA 4930529H12 gene                                    |
| AK011377 | 2610011I18Rik                         | RIKEN cDNA 2610011I18 gene                                                                   |
| AK018087 | 6230414M07Rik                         | RIKEN cDNA 6230414M07 gene                                                                   |
| AK018087 | 6230414M07Rik                         | RIKEN cDNA 6230414M07 gene                                                                   |
| AK014197 | 3110049I03Rik                         | RIKEN cDNA 3110049I03 gene                                                                   |
| AK020543 | 9530004M16Rik                         | RIKEN cDNA 9530004M16 gene                                                                   |
| AK015935 | 4930529H12Rik                         | RIKEN cDNA 4930529H12 gene                                                                   |
| AK015935 | 4930529H12Rik                         | RIKEN cDNA 4930529H12 gene                                                                   |
| AK007074 | ---                                   | ---                                                                                          |
| AK007074 | 1700095A21Rik                         | RIKEN cDNA 1700095A21 gene                                                                   |
| AK005121 | 1500002K03Rik                         | RIKEN cDNA 1500002K03 gene                                                                   |
| BF322785 | Mup1                                  | major urinary protein 1                                                                      |
| BI714160 | Zfp287                                | zinc finger protein 287                                                                      |
| BB306272 | Rora                                  | RAR-related orphan receptor alpha                                                            |
| BB306272 | Rora                                  | RAR-related orphan receptor alpha                                                            |
| BB033554 | Lef1                                  | Lymphoid enhancer binding factor 1                                                           |
| BB053506 | Rbms3                                 | RNA binding motif, single stranded interacting protein                                       |
| BM213788 | ---                                   | Transcribed locus                                                                            |
| BB120697 | Spr2a                                 | Small proline-rich protein 2B                                                                |
| BB135602 | LOC433377                             | similar to Interferon-activatable protein 203 (Ifi-203) (Interferon-inducible protein p203)  |
| BM198106 | Rex2                                  | reduced expression 2                                                                         |
| AW123234 | LOC433810                             | similar to transmembrane protein SHREW1                                                      |

|          |               |                                                                                                                                                                    |
|----------|---------------|--------------------------------------------------------------------------------------------------------------------------------------------------------------------|
| AW555368 | ---           | T-complex responder, Smok(Tcr) gene, t6 allele strain t-haplotype t6                                                                                               |
| BB482899 | Bnc2          | basonuclin 2                                                                                                                                                       |
| BQ174746 | 2900078E11Rik | RIKEN cDNA 2900078E11 gene                                                                                                                                         |
| BB393078 | ---           | Transcribed locus, strongly similar to XP_510099.1 PREDICTED: similar to neurexin 3-alpha [Pan troglodytes]                                                        |
| BB117670 | ---           | ---                                                                                                                                                                |
| BB800596 | A830006F12Rik | RIKEN cDNA A830006F12 gene                                                                                                                                         |
| BB124976 | 9630002D21Rik | RIKEN cDNA 9630002D21 gene                                                                                                                                         |
| BB061859 | BC052883      | cDNA sequence BC052883                                                                                                                                             |
| BB356786 | Prdm16        | PR domain containing 16                                                                                                                                            |
| BB097040 | ---           | CDNA clone IMAGE:30543871, partial cds                                                                                                                             |
| BB750043 | 9530006C21Rik | RIKEN cDNA 9530006C21 gene                                                                                                                                         |
| AV208461 | LOC541463     | testis-specific protein                                                                                                                                            |
| BB349344 | Usp25         | Ubiquitin specific protease 25                                                                                                                                     |
| AI048080 | 4930482J15Rik | RIKEN cDNA 4930482J15 gene                                                                                                                                         |
| AI326469 | ---           | ---                                                                                                                                                                |
| AI593945 | 2610027H17Rik | RIKEN cDNA 2610027H17 gene                                                                                                                                         |
| AV347067 | AI853688      | Expressed sequence AI853688                                                                                                                                        |
| BG070986 | Oaz2          | Ornithine decarboxylase antizyme 2                                                                                                                                 |
| BB051562 | ---           | 12 days embryo male wolffian duct includes surrounding region cDNA, RIKEN full-length enriched library, clone:6720430M22 product:unknown EST, full insert sequence |
| AI849127 | Dpf3          | D4, zinc and double PHD fingers, family 3                                                                                                                          |
| BB155332 | LOC433844     | similar to Anapc5 protein                                                                                                                                          |
| BB112393 | 9630050E16Rik | RIKEN cDNA 9630050E16 gene                                                                                                                                         |
| BB472466 | 6720403M19Rik | RIKEN cDNA 6720403M19 gene                                                                                                                                         |
| BB260131 | 6430701C03Rik | RIKEN cDNA 6430701C03 gene                                                                                                                                         |
| BG802688 | Ptpk          | Protein tyrosine phosphatase, receptor type, K                                                                                                                     |
| AI839625 | D14Ertd171e   | DNA segment, Chr 14, ERATO Doi 171, expressed                                                                                                                      |
| BB376943 | AW822216      | Expressed sequence AW822216                                                                                                                                        |
| BG083020 | ---           | ---                                                                                                                                                                |
| BG071029 |               | similar to ALY /// similar to ALY /// similar to ALY                                                                                                               |
| BII01322 | Lrrc19        | leucine rich repeat containing 19                                                                                                                                  |
| BM117570 | ---           | ---                                                                                                                                                                |
| BG066195 | D2Ertd173e    | DNA segment, Chr 2, ERATO Doi 173, expressed                                                                                                                       |
| AW556834 | ---           | ---                                                                                                                                                                |
| BB169269 | BC030499      | cDNA sequence BC030499                                                                                                                                             |
| AV268386 | ---           | Adult male testis cDNA, RIKEN full-length enriched library, clone:4930534N17 product:unclassifiable, full insert sequence                                          |
| BB228490 | AW539457      | expressed sequence AW539457                                                                                                                                        |
| BB028677 | 3-Sep         | septin 3                                                                                                                                                           |
| BG073304 | Pcp4l1        | Purkinje cell protein 4-like 1                                                                                                                                     |
| BG076234 | A330015D16Rik | RIKEN cDNA A330015D16 gene                                                                                                                                         |
| BG067367 | C86090        | expressed sequence C86090                                                                                                                                          |
| BG068807 | ---           | Transcribed locus                                                                                                                                                  |
| BG065821 | D12Ertd125e   | DNA segment, Chr 12, ERATO Doi 125, expressed                                                                                                                      |
| BG069080 | ---           | ---                                                                                                                                                                |
| BG066175 | ---           | ---                                                                                                                                                                |
| BG066727 | ---           | ---                                                                                                                                                                |

|          |                            |                                                                                                                           |
|----------|----------------------------|---------------------------------------------------------------------------------------------------------------------------|
| BE993069 | AI875142                   | Expressed sequence AI875142                                                                                               |
| BG067686 | 5830435C13Rik              | RIKEN cDNA 5830435C13 gene                                                                                                |
| BG066900 | C80893                     | expressed sequence C80893                                                                                                 |
| BB041366 | Akr1b3                     | Aldo-keto reductase family 1, member B3 (aldose reductase)                                                                |
| BG066928 | C81001                     | expressed sequence C81001                                                                                                 |
| BB250407 | Tmed5                      | transmembrane emp24 protein transport domain containing 5                                                                 |
| BM942607 | Ppp4c                      | Protein phosphatase 4, catalytic subunit                                                                                  |
| BE987947 | ---                        | Clone NIA:K0956B04 unknown mRNA                                                                                           |
| BB503979 | 4930573O21Rik              | RIKEN cDNA 4930573O21 gene                                                                                                |
| BG068986 | ---                        | ---                                                                                                                       |
| BB012661 | ---                        | Adult male testis cDNA, RIKEN full-length enriched library, clone:4930452E19 product:unclassifiable, full insert sequence |
| BG076325 | ---                        | Transcribed locus                                                                                                         |
| BG065840 | LOC385211 ///<br>LOC433783 | similar to RIKEN cDNA 1700029I01 /// similar to RIKEN cDNA 1700029I01                                                     |
| BG071600 | ---                        | Transcribed locus                                                                                                         |
| BB124954 | Lztf1                      | Leucine zipper transcription factor-like 1                                                                                |
| BG075609 | Piwil2                     | Piwi like homolog 2 (Drosophila)                                                                                          |
| BB241135 | ---                        | PREDICTED: Mus musculus similar to Cdv3 protein (LOC433790), mRNA                                                         |
| BB357080 | Rgs20                      | regulator of G-protein signaling 20                                                                                       |
| AW556352 | ErbB4                      | V-erb-a erythroblastic leukemia viral oncogene homolog 4 (avian)                                                          |
| BB082509 | 9330175H22Rik              | RIKEN cDNA 9330175H22 gene                                                                                                |
| BG068989 | ---                        | ---                                                                                                                       |
| BB496295 | ---                        | ---                                                                                                                       |
| BB497767 | Pax8                       | paired box gene 8                                                                                                         |
| BB249985 | A730037C10Rik              | RIKEN cDNA A730037C10 gene                                                                                                |
| BG066346 | ---                        | ---                                                                                                                       |
| BB156930 | A130033P14                 | hypothetical protein A130033P14                                                                                           |
| BB660139 | Zswim6                     | Zinc finger, SWIM domain containing 6                                                                                     |
| AU022245 | AU022245                   | expressed sequence AU022245                                                                                               |
| C77164   | 1700008I05Rik              | RIKEN cDNA 1700008I05 gene                                                                                                |
| BG068123 | ---                        | ---                                                                                                                       |
| BG068681 | ---                        | ---                                                                                                                       |
| AU042851 | ---                        | ---                                                                                                                       |
| C79752   | ---                        | ---                                                                                                                       |
| AU022045 | ---                        | ---                                                                                                                       |
| BE980854 | H2afy3                     | H2A histone family, member Y3                                                                                             |
| BF321332 | ---                        | ---                                                                                                                       |
| BE948370 | ---                        | Transcribed locus                                                                                                         |
| AI506532 | ---                        | ---                                                                                                                       |
| AW121856 | ---                        | ---                                                                                                                       |
| AI843353 | ---                        | Transcribed locus                                                                                                         |
| AI448156 | ---                        | ---                                                                                                                       |
| BI499978 | ---                        | Transcribed locus                                                                                                         |
| AV160090 | Snap25                     | Synaptosomal-associated protein 25                                                                                        |
| AV208528 | ---                        | Transcribed locus                                                                                                         |
| BB255841 | ---                        | ---                                                                                                                       |
| BB273287 | ---                        | ---                                                                                                                       |

|          |                                             |                                                                                                               |
|----------|---------------------------------------------|---------------------------------------------------------------------------------------------------------------|
| AK018466 | 8430436O14Rik                               | RIKEN cDNA 8430436O14 gene                                                                                    |
| BM217754 | 2900054D09Rik                               | RIKEN cDNA 2900054D09 gene                                                                                    |
| AK007420 | 4933439C20Rik                               | RIKEN cDNA 4933439C20 gene                                                                                    |
| BB626695 | Atbf1                                       | AT motif binding factor 1                                                                                     |
| BE945468 | 9530057J20Rik                               | RIKEN cDNA 9530057J20 gene                                                                                    |
| AV278800 | 4933403O03Rik                               | RIKEN cDNA 4933403O03 gene                                                                                    |
| AK019946 | 5430417C01Rik                               | RIKEN cDNA 5430417C01 gene                                                                                    |
| AK017499 | 5730405O12Rik                               | RIKEN cDNA 5730405O12 gene                                                                                    |
| AK014604 | 4632432E15Rik                               | RIKEN cDNA 4632432E15 gene                                                                                    |
| AK016790 | ---                                         | ---                                                                                                           |
| AK017129 | 4933439N06Rik                               | RIKEN cDNA 4933439N06 gene                                                                                    |
| BE225694 | Cri2                                        | CREBBP/EP300 inhibitory protein 2                                                                             |
| BI076807 | a                                           | Nonagouti                                                                                                     |
| BQ176181 | ---                                         | Transcribed locus                                                                                             |
| BM228829 | C87414 ///<br>LOC545772 ///<br>LOC545780    | expressed sequence C87414 /// similar to C87414 protein /// similar to C87414 protein                         |
| BB198406 | BB165335                                    | expressed sequence BB165335                                                                                   |
| BB417442 | Clec1a                                      | C-type lectin domain family 1, member a                                                                       |
| AV208162 | 4933406F09Rik                               | RIKEN cDNA 4933406F09 gene                                                                                    |
| BB308463 | B230303O12Rik                               | RIKEN cDNA B230303O12 gene                                                                                    |
| BM198753 | Gm397 ///<br>XM_486399 ///<br>LOC545913     | gene model 397, (NCBI) /// Mus musculus sequence XM_486399 /// similar to Gm397 protein                       |
| BB485668 | Nfx1l                                       | nuclear transcription factor, X-box binding-like 1                                                            |
| BM899576 | Odz2                                        | Odd Oz/ten-m homolog 2 (Drosophila)                                                                           |
| L26640   | LOC433975 ///<br>LOC545729 ///<br>LOC545730 | hypothetical gene supported by AK077204 /// hypothetical protein LOC545729 /// hypothetical protein LOC545730 |
| AI506888 | ---                                         | ---                                                                                                           |
| BB705267 | Og9x                                        | OG9 homeobox gene                                                                                             |
| BM121947 | Cd80                                        | CD80 antigen                                                                                                  |
| AW553423 | ---                                         | ---                                                                                                           |
| BB713391 | ---                                         | Mus musculus, Similar to RIKEN cDNA B430319H21 gene, clone IMAGE:3991101, mRNA                                |
| AI647966 | 5830446M03Rik                               | RIKEN cDNA B130021K23 gene                                                                                    |
| AI462674 | Cadps                                       | Ca <sup>2+</sup> -dependent activator protein for secretion                                                   |
| C79035   | ---                                         | ---                                                                                                           |
| AI413530 | Clec2e                                      | C-type lectin domain family 2, member e                                                                       |
| BE945748 | ---                                         | ---                                                                                                           |
| BB023775 | App                                         | Amyloid beta (A4) precursor protein                                                                           |
| AI585995 | ---                                         | ---                                                                                                           |
| AI118114 | ---                                         | Transcribed locus                                                                                             |
| AW494074 | ---                                         | Transcribed locus                                                                                             |
| BG069087 | Gpr149                                      | G protein-coupled receptor 149                                                                                |
| BG064130 | Ltbp1                                       | Latent transforming growth factor beta binding protein 1                                                      |
| BG066304 | D12Ertd208e                                 | DNA segment, Chr 12, ERATO Doi 208, expressed                                                                 |
| BG070655 | ---                                         | ---                                                                                                           |
| C77586   | D11Ertd49e                                  | DNA segment, Chr 11, ERATO Doi 49, expressed                                                                  |
| BG075241 | Zfp521                                      | Zinc finger protein 521                                                                                       |

|          |               |                            |
|----------|---------------|----------------------------|
| AW537756 | A230048G03Rik | RIKEN cDNA A230048G03 gene |
| BG074624 | ---           | ---                        |
| AU040911 | ---           | ---                        |
| BE992875 | ---           | ---                        |
| BB466780 | Trim2         | tripartite motif protein 2 |
| BF472132 | 1810057P16Rik | RIKEN cDNA 1810057P16 gene |
| BB473929 | ---           | ---                        |
| AK017182 | 5033421C21Rik | RIKEN cDNA 5033421C21 gene |
| AK021064 | Cdh10         | cadherin 10                |
| BI076807 | a             | Nonagouti                  |
