# Supplementary material for: Exosome-mediated transfer of mRNAs and microRNAs is a novel mechanism of genetic exchange between cells
Source: Springer Nature journal article supplement (doi:10.1038/ncb1596), 2007-05-07
Supplement: 41556_2007_BFncb1596_MOESM19_ESM.pdf [file 41556_2007_BFncb1596_MOESM19_ESM.pdf]

### Supplementary Information, Table S4.

#### Proteomic results from transfer of MC/9 exosomes to HMC-1 cells (identified spots from Fig. S3).

Human mast cells HMC-1 were incubated with and without the mouse MC/9 exosomes for 24 hours. Proteins between the two gels were matched and 96 newly produced proteins were identified by MALDI-tof. A number of spots were identified both as human and mouse proteins with same or different scores. Each identified protein was compared with exosomal mRNA and proteins identified by microarray (n=4) respectively LC-MS/MS (n=3). In the four microarray experiments, presence of mRNA in exosomes is labelled with P, absence with A, and mismatch with M. Presence of exosomal proteins identified in the three LC-MS/MS experiments is marked as 1, 2, and 3. ND means not detected.

| Spot no | Human protein                                         |       | Mouse protein                                                                       |       | Presence in exosomes |         |
|---------|-------------------------------------------------------|-------|-------------------------------------------------------------------------------------|-------|----------------------|---------|
|         | Accession                                             | Score | Accession                                                                           | Score | mRNA                 | Protein |
| 233     | (Q9BQE3) Alpha-tubulin 6                              | 124   | (P68373) Alpha-tubulin 6                                                            | 124   | MAPA                 | 1       |
| 282     | (P13796) Plastin-2                                    | 141   | (Q61233) Plastin-2                                                                  | 141   | AAAA                 | 1       |
| 251     | P14317) Hematopoietic lineage cell-specific protein   | 78    | (P49710) Hematopoietic lineage cell-specific protein                                | 78    | AAAA                 | ND      |
| 126     | (P14625) Endoplasmic                                  | 150   | (P08113) Endoplasmic                                                                | 132   | AAAA                 | 1       |
| 325     | (P61978) Heterogeneous nuclear ribonucleoprotein K    | 60    | (P61979) Heterogeneous nuclear ribonucleoprotein K                                  | 60    | PPAP                 | 1       |
| 425     | (P60709) Actin, cytoplasmic 1                         | 143   | (P60710) Actin, cytoplasmic 1                                                       | 143   | APPP                 | 3       |
| 187     | (P11142) Heat shock cognate 71 kDa protein            | 189   | (P63017) Heat shock cognate 71 kDa protein                                          | 189   | PAPA                 | 3       |
| 607     | (P63104) 14-3-3 protein zeta/delta                    | 113   | (P63101) 14-3-3 protein zeta/delta                                                  | 113   | PPPA                 | 2       |
| 220     | (P06576) ATP synthase subunit beta                    | 184   | (P56480) ATP synthase subunit beta                                                  | 163   | AAPP                 | ND      |
| 451     | (P63261) Actin, cytoplasmic 2                         | 142   | (P63260) Actin, cytoplasmic 2                                                       | 142   | APAP                 | 1       |
| 224     | (P60709) Actin, cytoplasmic 1                         | 158   | (P60710) Actin, cytoplasmic 1                                                       | 158   | APAP                 | 3       |
| 232     | (P07437) Tubulin beta-2 chain                         | 210   | (P99024) Tubulin beta-5 chain                                                       | 210   | APPP                 | 3       |
| 281     | (P60709) Actin, cytoplasmic 1                         | 53    | (P60710) Actin, cytoplasmic 1                                                       | 53    | APAP                 | 3       |
| 581     | (P48995) Short transient receptor potential channel 1 | 59    | (Q61056) Short transient receptor potential channel 1                               | 59    | AAAA                 | ND      |
| 349     | Not detected                                          |       | (P48771) Cytochrome c oxidase polypeptide VIIa-liver/heart, mitochondrial precursor | 60    | PPPP                 | ND      |
| 282     | Not detected                                          |       | (O89033) Cell division control protein 6 homolog                                    | 54    | MAPP                 | ND      |
| 187     | Not detected                                          |       | (P15620) Zinc finger protein 271                                                    | 60    | APAP                 | ND      |
