# Supplementary material for: Exosome-mediated transfer of mRNAs and microRNAs is a novel mechanism of genetic exchange between cells
Source: Springer Nature journal article supplement (doi:10.1038/ncb1596), 2007-05-07
Supplement: 41556_2007_BFncb1596_MOESM20_ESM.pdf [file 41556_2007_BFncb1596_MOESM20_ESM.pdf]

**Supplementary Information, Table S5.**

**All identified microRNA, in four experiments, from the mast cells derived (MC/9) exosomes.**

In each experiment double samples of exosomal microRNA were labelled with Hy3 and those from their donor cells were labelled with Hy5. Each signal were normalised against the background (background subtraction) and with global Lowess regression algorithm, scatterplot smoothing to minimize the differences between the colours intensity dependent manner. NA means that the signal detected was equal or below the background in two or more of the replicated measurements. Spots with NA signal in both the experiments (one and two) were removed. Median data for Hy3 and Hy5 is the normalised and averaged values from the replicated measurements (referred to <http://www.exiqon.com> or [www.exiqon.com/uploads/microRNA\\_profiling\\_servicesV1.0\(3\).pdf](http://www.exiqon.com/uploads/microRNA_profiling_servicesV1.0(3).pdf)) on the same slide and two experiments. CV-values are calculated from 4 replicate spots and paired in two data sets (intra-array CV).

| GeneId | Annotation         | Experiment 1             |            |            |      | Experiment 2             |            |            |      | Experiment 3             |            |            |      |
|--------|--------------------|--------------------------|------------|------------|------|--------------------------|------------|------------|------|--------------------------|------------|------------|------|
|        |                    | LogMedian Ratios Hy3/Hy5 | Median Hy3 | Median Hy5 | CV   | LogMedian Ratios Hy3/Hy5 | Median Hy3 | Median Hy5 | CV   | LogMedian Ratios Hy3/Hy5 | Median Hy3 | Median Hy5 | CV   |
| 11115  | No_known_mu_target | 7.6                      | 14964.5    | 80.6       | 15.4 | 6.5                      | 17847.3    | 191.4      | 13.9 | 6.5                      | 23606.6    | 244.8      | 8.3  |
| 11248  | mmu-miR-451        | 6.9                      | 8665.3     | 71.4       | 23.7 | 5.1                      | 10177.4    | 298.8      | 12.9 | 5.4                      | 12844.3    | 331.1      | 12.8 |
| 10924  | mmu-miR-10a        | -0.2                     | 353.3      | 380.7      | 7.8  | 3.2                      | 4985.6     | 535.7      | 11.4 | 2.9                      | 5704.8     | 855.0      | 13.7 |
| 8538   | mmu-miR-450        | 2.7                      | 892.5      | 138.2      | 5.3  | 2.9                      | 2380.2     | 329.5      | 17.4 | 2.9                      | 3206.9     | 396.4      | 18.2 |
| 11131  | No_known_mu_target | 2.8                      | 750.2      | 118.2      | 7.0  | 2.8                      | 1962.4     | 303.4      | 18.8 | 2.9                      | 2842.2     | 389.9      | 6.7  |
| 10958  | mmu-miR-150        | 2.0                      | 877.2      | 205.3      | 18.5 | 2.8                      | 2722.3     | 397.5      | 6.0  | 2.8                      | 3384.6     | 503.2      | 9.6  |
| 13180  | No_known_mu_target | 1.3                      | 1649.6     | 667.0      | 27.9 | 2.7                      | 3586.0     | 558.2      | 7.7  | 2.5                      | 3672.2     | 623.3      | 8.2  |
| 10907  | labelling_control  | 1.8                      | 1163.2     | 355.3      | 22.4 | 2.0                      | 8648.1     | 2017.6     | 12.8 | 2.2                      | 7696.9     | 1625.8     | 7.6  |
| 14264  | spike_control-08   | 2.3                      | 2690.9     | 528.4      | 10.5 | 1.8                      | 6362.3     | 1933.5     | 12.4 | 2.1                      | 6750.5     | 1548.4     | 8.3  |
| 10905  | spike_control-     | 1.5                      | 994.1      | 384.7      | 28.  | 1.8                      | 6903.7     | 1951.8     | 10.  | 2.1                      | 6474.0     | 1478.8     | 7.4  |

|       |                  |      |         |        |      |     |         |         |      |      |         |         |      |
|-------|------------------|------|---------|--------|------|-----|---------|---------|------|------|---------|---------|------|
|       | 18               |      |         |        | 6    |     |         |         | 5    |      |         |         |      |
| 11035 | mmu-miR-296      | 1.0  | 4197.2  | 2047.3 | 18.4 | 1.8 | 4341.3  | 1271.0  | 7.0  | 1.9  | 5441.3  | 1450.2  | 8.9  |
| 11229 | mmu-miR-341      | 0.2  | 5198.3  | 4460.3 | 22.8 | 1.3 | 4347.5  | 1772.4  | 43.4 | 1.1  | 5288.3  | 2300.2  | 8.9  |
| 10965 | mmu-miR-15a      | -0.2 | 628.4   | 871.1  | 30.3 | 0.6 | 2386.9  | 1381.1  | 36.0 | 1.1  | 2584.4  | 1250.1  | 13.7 |
| 10966 | mmu-miR-15b      | -0.2 | 1438.9  | 1636.0 | 16.9 | 0.6 | 4795.9  | 3144.2  | 7.3  | 0.7  | 6469.4  | 3922.6  | 7.7  |
| 11028 | mmu-miR-24       | -0.5 | 3113.4  | 4450.1 | 17.3 | 0.6 | 4265.6  | 2789.0  | 25.2 | 0.4  | 5445.0  | 4223.1  | 9.3  |
| 10904 | spike_control-17 | 2.7  | 8169.8  | 1233.8 | 12.1 | 0.6 | 20677.9 | 13301.6 | 16.7 | 1.2  | 22025.4 | 9551.8  | 9.0  |
| 10999 | mmu-miR-20a      | -0.6 | 347.2   | 558.2  | 27.2 | 0.5 | 1818.8  | 1345.4  | 6.6  | 0.1  | 1899.8  | 1680.4  | 17.5 |
| 10899 | spike_control-12 | 1.8  | 18701.0 | 5564.0 | 15.4 | 0.5 | 70227.5 | 49706.8 | 3.1  | 0.7  | 69723.9 | 43826.6 | 5.4  |
| 14257 | spike_control-01 | 0.8  | 15030.2 | 8429.0 | 18.7 | 0.5 | 69119.6 | 49758.0 | 3.8  | 0.7  | 74283.9 | 46586.5 | 6.2  |
| 10915 | mmu-let-7i       | -1.3 | 1375.8  | 3361.0 | 11.4 | 0.4 | 4708.7  | 3486.1  | 32.7 | -0.2 | 5616.8  | 6635.5  | 8.6  |
| 11023 | mmu-miR-222      | 0.1  | 873.5   | 818.1  | 15.8 | 0.4 | 1707.8  | 1317.7  | 11.8 | 0.4  | 1936.8  | 1316.4  | 10.2 |
| 11008 | mmu-miR-20a      | -1.1 | 425.1   | 882.9  | 10.6 | 0.3 | 1832.9  | 1458.0  | 16.4 | 0.0  | 1780.8  | 1928.9  | 15.7 |
| 11056 | mmu-miR-324-3p   | -0.1 | 3387.4  | 3663.3 | 16.4 | 0.3 | 1937.0  | 1642.3  | 11.3 | 0.3  | 2682.5  | 2200.4  | 19.2 |
| 11026 | mmu-miR-23a      | -0.1 | 3075.4  | 3377.6 | 17.4 | 0.3 | 5154.6  | 3657.2  | 22.3 | 0.1  | 6123.3  | 5595.6  | 3.7  |
| 5740  | mmu-miR-21       | -0.9 | 3291.4  | 6251.2 | 15.4 | 0.3 | 4108.8  | 3396.4  | 20.0 | 0.0  | 6002.0  | 5933.8  | 3.0  |
| 10978 | mmu-miR-184      | -0.1 | 5987.1  | 6654.6 | 16.1 | 0.2 | 1896.9  | 2168.6  | 52.0 | 0.5  | 2404.3  | 1718.7  | 23.7 |
| 10936 | mmu-miR-130b     | 0.1  | 5417.1  | 4635.8 | 27.5 | 0.2 | 2395.9  | 2012.5  | 12.4 | 0.3  | 2879.4  | 2231.5  | 24.2 |
| 11132 | mmu-miR-500      | -0.4 | 4737.3  | 6431.3 | 15.  | 0.1 | 1575.2  | 1469.8  | 6.4  | -0.1 | 2424.3  | 2584.0  | 9.6  |

|       |                    |      |         |         |      |      |         |         |      |      |         |         |      |
|-------|--------------------|------|---------|---------|------|------|---------|---------|------|------|---------|---------|------|
|       |                    |      |         |         | 7    |      |         |         |      |      |         |         |      |
| 11039 | mmu-miR-29a        | -0.7 | 1876.7  | 3132.8  | 11.9 | 0.1  | 4419.9  | 4226.0  | 33.4 | -0.6 | 3269.6  | 4829.1  | 23.7 |
| 11227 | mmu-miR-329        | -0.8 | 719.5   | 1275.1  | 20.3 | 0.1  | 2042.9  | 1750.2  | 18.7 | 0.2  | 2252.4  | 2019.5  | 17.4 |
| 11145 | No_known_mu_target | 0.3  | 6645.8  | 5444.7  | 19.2 | 0.1  | 3860.8  | 3745.3  | 29.6 | 0.1  | 5441.2  | 4019.8  | 38.3 |
| 11030 | mmu-miR-26a        | 0.1  | 2135.2  | 1987.3  | 12.6 | 0.0  | 2284.2  | 2293.8  | 26.7 | 0.5  | 5128.5  | 3633.4  | 20.9 |
| 11050 | mmu-miR-30c        | -1.2 | 375.1   | 722.6   | 15.5 | 0.0  | 1535.3  | 1417.3  | 7.9  | 0.0  | 1928.2  | 1912.6  | 11.4 |
| 11130 | No_known_mu_target | 0.6  | 19576.8 | 12511.4 | 16.4 | 0.0  | 34792.2 | 34478.3 | 8.6  | 0.4  | 47896.5 | 36336.7 | 1.1  |
| 11059 | mmu-miR-326        | 0.4  | 1117.1  | 868.9   | 16.0 | 0.0  | 1725.4  | 1770.4  | 9.1  | 0.0  | 1621.7  | 1551.8  | 15.1 |
| 11245 | mmu-miR-433-5p     | 0.6  | 5169.6  | 3497.0  | 26.7 | 0.0  | 1813.1  | 1722.5  | 31.3 | -0.5 | 1612.3  | 2473.3  | 19.8 |
| 10983 | mmu-miR-18         | -1.4 | 336.1   | 750.0   | 20.7 | 0.0  | 1461.4  | 1506.1  | 18.8 | -0.1 | 1629.7  | 1661.9  | 13.4 |
| 10912 | mmu-let-7b         | -0.2 | 1676.9  | 1953.3  | 10.1 | -0.1 | 1493.4  | 1562.0  | 10.3 | -0.4 | 1192.4  | 1519.6  | 16.0 |
| 10967 | mmu-miR-16         | -0.7 | 1835.4  | 2883.6  | 13.0 | -0.1 | 3484.1  | 3183.3  | 31.9 | -0.4 | 3387.4  | 4406.6  | 21.2 |
| 11208 | mmu-miR-207        | -0.5 | 2007.5  | 2808.7  | 21.7 | -0.2 | 1464.8  | 1590.7  | 21.1 | -0.4 | 1342.6  | 1718.2  | 47.8 |
| 13141 | No_known_mu_target | -1.5 | 256.2   | 713.4   | 32.4 | -0.2 | 1369.4  | 1535.0  | 15.2 | -0.3 | 1311.2  | 1646.4  | 6.5  |
| 10934 | mmu-miR-129-5p     | 0.7  | 7995.3  | 4756.6  | 23.3 | -0.2 | 6570.1  | 7222.0  | 9.3  | -0.1 | 8559.7  | 8958.6  | 42.0 |
| 13132 | No_known_mu_target | 0.2  | 4491.1  | 3793.0  | 17.5 | -0.2 | 1742.5  | 2008.8  | 24.9 | -0.1 | 2074.1  | 2303.5  | 6.6  |
| 10306 | mmu-miR-146b       | -0.3 | 480.0   | 549.8   | 31.7 | -0.2 | 1430.7  | 1648.1  | 22.5 | -0.4 | 1611.1  | 2173.3  | 16.1 |
| 13173 | mmu-miR-17-5p      | -0.9 | 787.1   | 1327.8  | 39.6 | -0.2 | 1749.8  | 2013.2  | 15.2 | 0.0  | 2468.1  | 2494.4  | 39.6 |
| 11216 | mmu-miR-292-       | 1.0  | 32880.7 | 15873.7 | 17.  | -0.2 | 39332.7 | 44156.2 | 5.6  | 0.3  | 52620.2 | 42466.7 | 3.6  |

|       |                         |      |         |         |      |      |         |         |      |      |         |         |      |
|-------|-------------------------|------|---------|---------|------|------|---------|---------|------|------|---------|---------|------|
|       | 5p                      |      |         |         | 7    |      |         |         |      |      |         |         |      |
| 10948 | mmu-miR-142-5p          | -2.6 | 1288.0  | 7614.8  | 11.5 | -0.2 | 1811.2  | 2224.1  | 5.4  | -0.1 | 2815.6  | 3150.7  | 22.6 |
| 11086 | No_known_mu_target      | 1.0  | 24964.7 | 12130.4 | 20.9 | -0.3 | 33856.9 | 40508.1 | 8.5  | 0.3  | 46818.7 | 38720.9 | 2.3  |
| 13137 | No_known_mu_target      | 0.5  | 1867.4  | 1323.9  | 28.6 | -0.3 | 1482.8  | 1626.3  | 43.5 | 0.0  | 1513.1  | 1544.1  | 16.0 |
| 10977 | mmu-miR-183             | -0.3 | 1100.9  | 1383.6  | 18.0 | -0.3 | 2138.2  | 2776.2  | 14.0 | -0.2 | 2915.5  | 3397.6  | 10.1 |
| 10985 | mmu-miR-191             | -0.6 | 441.6   | 650.1   | 18.0 | -0.3 | 1426.6  | 1765.4  | 15.5 | -0.3 | 1610.3  | 1907.8  | 23.1 |
| 13147 | mmu-miR-96              | -1.3 | 606.5   | 1403.1  | 19.1 | -0.3 | 1206.8  | 1516.1  | 30.9 | -0.4 | 1934.3  | 2620.3  | 47.5 |
| 11193 | No_known_mu_target      | 0.0  | 4523.7  | 4482.7  | 12.3 | -0.4 | 1610.1  | 2067.2  | 29.4 | -0.9 | 1955.3  | 3133.1  | 22.0 |
| 10922 | mmu-miR-106b            | -0.8 | 1162.2  | 1950.4  | 25.0 | -0.4 | 1899.6  | 2620.4  | 14.3 | -0.6 | 1778.3  | 2772.7  | 13.9 |
| 10921 | No_known_mu_target      | -0.7 | 701.3   | 999.6   | 18.6 | -0.4 | 1276.6  | 1652.0  | 32.6 | 0.1  | 2002.9  | 1861.1  | 14.1 |
| 11214 | mmu-miR-291a-5p-291b-5p | -0.1 | 4962.1  | 5030.2  | 14.4 | -0.4 | 1378.9  | 1780.7  | 11.6 | -0.9 | 1901.2  | 3421.3  | 23.9 |
| 10913 | mmu-let-7c              | 0.0  | 1291.4  | 1245.4  | 15.7 | -0.4 | 1201.9  | 1582.3  | 13.1 | -0.3 | 1150.5  | 1422.8  | 16.5 |
| 10923 | mmu-miR-107             | -0.5 | 1692.0  | 2266.9  | 11.5 | -0.4 | 1915.3  | 2475.3  | 7.6  | -0.4 | 2168.0  | 2788.7  | 12.8 |
| 11177 | No_known_mu_target      | 0.1  | 5750.4  | 5260.9  | 18.2 | -0.4 | 1539.7  | 2002.4  | 25.6 | -0.7 | 1453.2  | 2210.5  | 12.5 |
| 14265 | control-09              | 0.1  | 5575.2  | 5093.6  | 19.0 | -0.5 | 2977.2  | 4275.6  | 6.0  | -0.4 | 5871.6  | 7874.9  | 2.8  |
| 11212 | mmu-miR-290             | 0.2  | 21169.8 | 18448.0 | 20.2 | -0.5 | 26494.8 | 37197.5 | 12.9 | 0.1  | 37436.5 | 36230.3 | 3.0  |
| 11235 | mmu-miR-351             | 0.0  | 3218.3  | 3438.0  | 5.9  | -0.5 | 1851.3  | 2673.5  | 15.0 | -0.2 | 2790.3  | 3221.2  | 10.7 |
| 11124 | No_known_mu_target      | -0.1 | 7029.5  | 7324.7  | 17.6 | -0.5 | 5195.4  | 7667.9  | 13.0 | -0.8 | 6695.7  | 11701.9 | 19.5 |

|       |                    |      |         |        |      |      |        |        |      |      |        |        |      |
|-------|--------------------|------|---------|--------|------|------|--------|--------|------|------|--------|--------|------|
| 14269 | No_known_mu_target | -0.7 | 2168.3  | 3430.4 | 8.6  | -0.6 | 1031.1 | 1516.8 | 24.2 | -1.2 | 794.4  | 1800.7 | 32.6 |
| 11201 | mmu-miR-140*       | 0.1  | 612.0   | 518.9  | 26.5 | -0.6 | 1187.0 | 1740.2 | 30.3 | -1.0 | 892.8  | 1721.6 | 22.6 |
| 11204 | mmu-miR-17-3p      | -0.3 | 5965.2  | 7278.7 | 22.8 | -0.6 | 1659.3 | 2498.8 | 33.1 | 0.0  | 2425.9 | 2475.5 | 32.3 |
| 13129 | No_known_mu_target | -0.3 | 352.7   | 425.7  | 14.6 | -0.6 | 2599.0 | 4010.7 | 4.6  | 0.1  | 2743.2 | 2488.6 | 7.1  |
| 10975 | mmu-miR-182        | -1.0 | 953.6   | 1804.2 | 13.9 | -0.6 | 2840.6 | 3992.7 | 8.7  | -0.3 | 4860.9 | 5928.2 | 18.3 |
| 11142 | No_known_mu_target | 0.1  | 4979.1  | 4797.0 | 15.5 | -0.6 | 2368.2 | 3810.8 | 11.7 | -0.7 | 3235.2 | 4709.0 | 22.5 |
| 11175 | No_known_mu_target | -0.1 | 3228.2  | 3154.0 | 17.6 | -0.7 | 1300.2 | 2097.1 | 13.2 | -0.5 | 1674.7 | 2363.8 | 17.2 |
| 6500  | mmu-let-7f         | -1.8 | 1933.6  | 6562.8 | 32.2 | -0.7 | 2823.3 | 4625.0 | 9.2  | -1.0 | 3565.0 | 7265.9 | 13.2 |
| 14316 | No_known_mu_target | -0.5 | 4492.9  | 6448.9 | 16.8 | -0.7 | 1707.3 | 2787.2 | 27.3 | -1.1 | 1411.4 | 3030.6 | 35.0 |
| 11176 | No_known_mu_target | 0.0  | 2651.0  | 2624.3 | 10.1 | -0.7 | 954.5  | 1525.8 | 26.5 | -0.4 | 1250.7 | 1610.2 | 15.2 |
| 10586 | No_known_mu_target | 0.0  | 2805.1  | 2926.2 | 15.1 | -0.7 | 1643.4 | 2680.4 | 8.6  | -0.9 | 1526.1 | 2724.6 | 24.1 |
| 13175 | mmu-miR-27b        | 0.1  | 1753.9  | 1583.3 | 7.8  | -0.7 | 972.8  | 1616.3 | 8.5  | -0.4 | 1484.0 | 1810.7 | 12.7 |
| 11258 | No_known_mu_target | -0.3 | 2198.0  | 2452.9 | 10.2 | -0.8 | 963.8  | 1632.5 | 28.7 | -1.0 | 908.0  | 1734.1 | 32.6 |
| 10898 | control-11         | 0.4  | 11637.6 | 8019.7 | 35.7 | -0.8 | 903.3  | 1549.5 | 9.8  | -1.0 | 1264.0 | 2574.5 | 26.9 |
| 11254 | mmu-miR-468        | -0.8 | 280.7   | 507.2  | 18.2 | -0.8 | 1178.9 | 2085.3 | 16.7 | -0.8 | 1271.7 | 2242.5 | 30.9 |
| 13169 | mmu-let-7d*        | -1.3 | 322.5   | 801.4  | 30.4 | -0.8 | 902.5  | 1525.2 | 28.2 | -0.9 | 962.4  | 1784.6 | 29.0 |
| 11221 | mmu-miR-300        | -0.5 | 5010.6  | 7208.5 | 15.5 | -0.8 | 933.2  | 1580.1 | 6.7  | -1.3 | 1487.8 | 4171.9 | 12.1 |
| 11027 | mmu-miR-23b        | -0.4 | 2413.3  | 3249.2 | 9.1  | -0.9 | 2481.4 | 4494.6 | 13.7 | -0.6 | 3285.9 | 5402.1 | 10.2 |

|       |                    |      |         |        |      |      |         |         |      |      |         |         |      |
|-------|--------------------|------|---------|--------|------|------|---------|---------|------|------|---------|---------|------|
| 11071 | No_known_mu_target | -0.4 | 3496.4  | 4062.0 | 12.0 | -0.9 | 1485.4  | 2452.8  | 16.6 | -0.7 | 1570.0  | 2473.2  | 4.7  |
| 10993 | No_known_mu_target | -0.1 | 5903.4  | 6530.8 | 29.6 | -0.9 | 3581.7  | 7171.2  | 33.6 | -0.9 | 4937.6  | 8519.3  | 18.3 |
| 11256 | mmu-miR-470        | 0.0  | 4698.6  | 4590.8 | 9.1  | -0.9 | 1354.3  | 2322.9  | 23.0 | -0.9 | 2261.7  | 4105.5  | 13.4 |
| 11082 | mmu-miR-370        | -0.2 | 4015.5  | 4717.8 | 14.9 | -0.9 | 1664.2  | 3032.0  | 9.4  | -1.2 | 1895.3  | 4338.6  | 15.0 |
| 11151 | No_known_mu_target | 0.0  | 3407.3  | 3372.0 | 21.3 | -0.9 | 893.0   | 1649.2  | 17.9 | -0.6 | 1054.8  | 1661.2  | 12.7 |
| 11259 | No_known_mu_target | -0.1 | 3829.1  | 4175.7 | 18.9 | -0.9 | 1153.6  | 2170.5  | 19.7 | -0.8 | 1275.3  | 2387.9  | 14.1 |
| 14291 | mmu-miR-542-5p     | 0.0  | 5089.0  | 5150.2 | 14.4 | -1.0 | 1756.0  | 3489.5  | 11.4 | -1.2 | 3123.8  | 7239.9  | 2.7  |
| 11270 | No_known_mu_target | -0.1 | 2316.4  | 2568.3 | 12.0 | -1.1 | 1785.3  | 3787.4  | 11.9 | -1.0 | 2522.8  | 4920.0  | 12.7 |
| 3320  | mmu-let-7a         | -0.9 | 1730.9  | 3428.1 | 11.6 | -1.1 | 3054.4  | 6796.7  | 7.4  | -0.2 | 3369.3  | 3583.3  | 24.7 |
| 14287 | mmu-miR-494        | -0.5 | 5989.8  | 8465.0 | 17.4 | -1.2 | 5250.7  | 11746.8 | 17.3 | -0.7 | 5998.3  | 9733.8  | 10.6 |
| 14306 | mmu-miR-381        | -0.1 | 3420.8  | 3779.5 | 15.1 | -1.2 | 959.7   | 2169.6  | 23.7 | -1.2 | 1235.7  | 2553.6  | 29.2 |
| 14293 | mmu-miR-546        | -0.1 | 5434.4  | 5746.3 | 17.6 | -1.2 | 1403.7  | 3170.9  | 16.5 | -1.3 | 2896.1  | 7413.9  | 10.4 |
| 10914 | mmu-let-7d         | -0.6 | 5319.4  | 8211.8 | 20.4 | -1.2 | 2681.4  | 7145.1  | 28.0 | -1.0 | 3751.9  | 7343.4  | 4.6  |
| 13131 | No_known_mu_target | 0.4  | 6573.7  | 5117.7 | 26.1 | -1.3 | 4681.3  | 11031.8 | 11.3 | -1.1 | 5889.2  | 13289.6 | 13.1 |
| 14284 | mmu-miR-422b       | -0.2 | 4573.8  | 5346.1 | 11.9 | -1.3 | 1233.6  | 3519.1  | 20.9 | -1.4 | 2040.6  | 5115.8  | 5.7  |
| 11054 | mmu-miR-320        | 0.9  | 10984.2 | 6048.8 | 26.9 | -1.4 | 15200.5 | 40293.3 | 4.8  | -1.1 | 16735.4 | 35467.5 | 3.3  |
| 11116 | mmu-miR-452        | -0.6 | 5332.3  | 7922.0 | 22.3 | -1.6 | 1891.9  | 6130.0  | 17.4 | -1.1 | 2763.9  | 6105.8  | 17.9 |
| 11264 | No_known_mu_target | 0.2  | 9475.4  | 8099.2 | 15.9 | -1.7 | 10324.7 | 33114.8 | 5.0  | -1.1 | 14621.2 | 30573.6 | 4.8  |

|       |                    |      |         |         |      |      |         |         |      |      |         |         |      |
|-------|--------------------|------|---------|---------|------|------|---------|---------|------|------|---------|---------|------|
| 11014 | mmu-miR-214        | -0.2 | 6318.1  | 7503.6  | 17.8 | -1.7 | 2449.0  | 8060.8  | 5.7  | -1.3 | 3341.8  | 8936.3  | 13.3 |
| 13139 | mmu-let-7e         | -1.5 | 2384.9  | 5670.4  | 41.1 | -1.8 | 1866.1  | 6214.6  | 9.6  | -0.9 | 2848.5  | 5515.8  | 30.0 |
| 11220 | mmu-miR-298        | -0.2 | 16076.3 | 19474.8 | 19.8 | -1.8 | 11092.1 | 38931.5 | 1.4  | -1.4 | 13205.8 | 34561.5 | 3.7  |
| 11003 | No_known_mu_target | 0.0  | 7845.3  | 7923.7  | 13.0 | -1.9 | 4221.7  | 15489.8 | 14.2 | -1.8 | 5696.2  | 19488.4 | 9.4  |
| 5560  | mmu-miR-185        | 0.2  | 6268.0  | 5583.7  | 29.1 | -2.0 | 4048.8  | 16165.0 | 11.1 | -2.0 | 5246.6  | 20921.6 | 5.3  |
| 11126 | No_known_mu_target | -0.6 | 7342.2  | 11003.1 | 11.2 | -2.1 | 7249.2  | 31643.3 | 5.0  | -1.5 | 8465.4  | 23625.9 | 3.3  |
| 14288 | mmu-miR-503        | -0.2 | 5050.2  | 5812.8  | 16.7 | -2.2 | 2955.5  | 13506.4 | 17.0 | -1.6 | 3652.6  | 10777.7 | 13.3 |
| 14267 | No_known_mu_target | -2.6 | 11891.2 | 73197.0 | 17.0 | -2.4 | 6708.3  | 36823.1 | 7.0  | -2.4 | 4988.8  | 27282.1 | 2.8  |
| 11279 | U6-snRNA-2         | -1.0 | 10483.0 | 19886.8 | 7.5  | -2.5 | 6607.3  | 36565.6 | 3.2  | -1.8 | 8278.5  | 29849.5 | 5.0  |
| 10947 | mmu-miR-142-3p     | -3.5 | 2695.9  | 29634.4 | 17.7 | -2.6 | 5866.1  | 35893.0 | 4.9  | -2.0 | 8055.2  | 32223.6 | 4.8  |
| 11135 | No_known_mu_target | -0.1 | 5918.4  | 6329.4  | 18.2 | -2.6 | 3800.5  | 23153.5 | 16.6 | -1.9 | 5075.9  | 18726.3 | 6.8  |
| 11146 | No_known_mu_target | -0.8 | 5701.7  | 9843.4  | 9.5  | -2.7 | 4662.2  | 30840.1 | 6.9  | -2.2 | 5261.7  | 25225.9 | 2.3  |
| 11278 | U6-snRNA-1         | -1.3 | 1118.6  | 2632.3  | 18.6 | -2.8 | 1972.8  | 13547.7 | 21.1 | -2.0 | 1663.1  | 6671.8  | 34.9 |
