# Supplementary material for: Exosome-mediated transfer of mRNAs and microRNAs is a novel mechanism of genetic exchange between cells
Source: Springer Nature journal article supplement (doi:10.1038/ncb1596), 2007-05-07
Supplement: 41556_2007_BFncb1596_MOESM21_ESM.pdf [file 41556_2007_BFncb1596_MOESM21_ESM.pdf]

**Supplementary Information, Table S6.****The relative amount of protein and RNA in MC/9 and HMC-1 exosomes.**

Proteins and RNA from MC/9 and HMC-1 cells was extracted and the amount determined by the BCA method and spectrophotometry respectively. The amount of proteins and RNA was correlated to the cell number and volume of their producing cells.

|                                                                   | MC/9 exosomes |      |   | HMC-1 exosomes |      |   |
|-------------------------------------------------------------------|---------------|------|---|----------------|------|---|
|                                                                   | Mean          | SE   | n | Mean           | SE   | n |
| protein amount per cell number ( $\mu\text{g}/10^6\text{cells}$ ) | 2.5           | 0.6  | 6 | 9.4            | 2.3  | 3 |
| protein amount per cell suspension ( $\mu\text{g}/\text{ml}$ )    | 3.5           | 1.2  | 6 | 8.6            | 2.8  | 4 |
| RNA amount per cell number ( $\text{ng}/10^6\text{cells}$ )       | 19.3          | 6.5  | 4 | 46.5           | 23.4 | 6 |
| RNA amount per cell suspension ( $\text{ng}/\text{ml}$ )          | 30.1          | 11.5 | 4 | 64.7           | 33.9 | 6 |
| RNA amount per protein amount ( $\text{ng}/\mu\text{g}$ )         | 7.9           |      |   | 4.9            |      |   |
